# Supplementary material for: Plasma Vitamin E and the Risk of First Stroke in Hypertensive Patients: A Nested Case-Control Study
Source: Front Nutr. 2021 Nov 3;8:734580. doi: 10.3389/fnut.2021.734580 (PMC8595403; doi:10.3389/fnut.2021.734580)
Supplement: Supplementary file 2 [file Data_Sheet_1.XLSX]

## Sheet: cspptncc
ID	center	age	sex	c677t	smk.grp	alh.grp	bmi	wh.ratio	sbp	dbp	tg	tcho	hdl	fa	b12	hcy	glu	egfr	VitE	VitA	VitD3	Mg	Cu	Zn	Se	stroke_time_sbp	stroke_time_dbp	drug.glu	drug.hyt	usage.ccb	usage.du	usage.glu.lowering	usage.anti.plt	usage.lipid.lowering	hist.dm	group	stroke	pair
YY000019	ANQ	49.6427	M	CC	current	no	23.1247	0.896552	162	84	1.36	5.05	1.18	8.349	471.059	9.54	4.77	103.383	10.082	76.6	31.99	21.2518	73.7625	117.332	8.685	136.994	77.8919	FALSE	FALSE	1	0	0	0	0	FALSE	b	1	1
YY000079	ANQ	50.7515	M	TT	current	no	21.1553	0.858696	162.667	90	1.17	7.41	1.37	12.062	442.244	11.13	5	87.9235	14.07	92.2	18.782	21.7172	85.89	134.655	9.155	152.56	87.2308	FALSE	FALSE	1	0	0	0	0	FALSE	b	0	1
YY000129	ANQ	61.4867	M	CT	past	no	24.4956	0.878788	146.667	70.6667	1.45	4.29	0.87	7.991	338.811	13.46	5.78	80.2068	7.9	72	20.935	18.3077	80.76	120.123	8.4475	173.667	79.6667	FALSE	TRUE	1	0	0	0	0	FALSE	a	1	2
YY000221	ANQ	61.2567	M	CT	past	current	23.2166	0.945652	162.667	90	1.27	4.43	1.18	17.208	278.544	10.92	4.99	95.8839	14.388	74.3	24.169	17.4978	84.6425	129.435	11.7725	149.391	82.8332	FALSE	TRUE	1	0	0	0	0	FALSE	a	0	2
YY000152	ANQ	62.6229	M	CT	past	current	19.4362	0.823529	140	92	0.71	4.93	1.95	9.747	314.89	15.88	5.38	90.912	10.366	64.3	21.045	19.6305	109.19	115.87	8.8525	136.901	90.4734	FALSE	FALSE	1	0	0	0	0	FALSE	a	0	3
YY000180	ANQ	62.7023	M	CT	past	current	22.2137	0.913043	173.333	94.6667	1.9	4.68	1.29	8.691	362.015	10.62	4.64	92.2615	10.902	100.5	26.175	19.2745	114.09	133.375	9.205	140.593	81.3887	FALSE	TRUE	1	0	0	0	0	FALSE	a	1	3
YY000104	ANQ	65.3689	F	CC	no	no	20.0288	0.808989	149.333	75.3333	1.34	4.48	1.06	12.827	295.191	14.13	4.65	74.6623	10.149	62	13.785	19.8766	84.9225	104.96	5.7425	142.957	76.7938	FALSE	FALSE	1	0	0	0	0	FALSE	b	0	4
YY000203	ANQ	65.2758	F	CC	current	no	19.2706	0.797753	145.333	78.6667	0.8	4.81	1.93	17.617	535.238	10.51	4.6	91.4811	10.115	54.1	18.348	17.4825	76.2375	99.9	8.4275	139.563	76.6487	FALSE	FALSE	0	0	0	0	0	FALSE	b	1	4
YY000312	ANQ	63.3867	M	CC	no	no	29.7608	0.925926	159.333	93.3333	1.11	4.31	1.34	9.879	339.619	13.94	5.61	75.8274	8.335	61.6	23.514	20.003	81.695	114.565	6.9775	134.223	81.5766	FALSE	FALSE	1	0	0	0	0	FALSE	b	1	5
YY000432	ANQ	63.2936	M	TT	current	current	20.3402	0.890244	174.667	96	0.96	7.08	2.34	5.624	153.478	33.02	4.66	97.2043	13.406	96.1	23.964	18.171	105.035	134.787	8.4225	143.397	81.5342	FALSE	FALSE	1	0	0	0	0	FALSE	b	0	5
YY000311	ANQ	73.8316	M	CT	current	no	17.4044	0.825	176.667	84	1.07	5.19	1.39	6.854	353.743	18.07	6.02	64.4063	10.168	59.1	15.7	17.6647	108.485	134.822	5.87	134.185	74.455	FALSE	FALSE	1	0	0	0	0	FALSE	a	0	6
YY000314	ANQ	73.8809	M	CC	current	current	17.5056	0.904762	159.333	94.6667	1	4.63	1.02	5.259	274.145	16.51	4.38	90.0159	9.258	56.8	13.34	20.412	81.56	70.7275	5.945	144.333	85.6667	FALSE	FALSE	1	1	0	0	0	FALSE	a	1	6
YY000316	ANQ	64.1889	M	CT	current	no	23.7332	0.954545	142.667	94	1.01	5.74	1.33	10.317	384.244	14.12	5.43	90.1982	14.86	58.6	17.926	20.2174	103.615	122.082	8.44	129.333	90	FALSE	TRUE	1	0	0	0	0	FALSE	b	1	7
YY000359	ANQ	63.1403	M	CT	past	no	22.5586	0.941176	155.333	78.6667	1.31	4.31	1.14	9.732	583.586	14.55	4.86	96.5985	7.94	51.3	19.491	18.9585	83.2175	75.3175	5.63	127.028	74.4033	FALSE	FALSE	1	0	0	0	0	FALSE	b	0	7
YY000409	ANQ	67.2635	M	CT	no	past	24.2938	0.915464	177.333	100	1.59	4.71	1	7.819	289.655	15.29	6.97	63.6247	8.844	69.6	22.748	19.3535	90.7325	116.75	12.895	139.245	86.4073	FALSE	FALSE	1	1	0	0	0	FALSE	b	0	8
YY000473	ANQ	66.8118	M	CT	no	no	25.5307	0.901478	166.667	83.3333	0.99	4.99	1.17	13.005	727.745	13	4.83	93.4081	10.422	55.5	24.274	27.2226	124.095	138.185	14.5075	138.162	78.663	FALSE	TRUE	1	0	0	0	0	FALSE	b	1	8
YY000469	ANQ	65.3169	M	CT	past	current	22.2684	0.901554	157.333	95.3333	1.37	5.39	1.28	9.5175	646.41	20.16	4.6	42.7657	15.887	148	25.765	22.8751	113.81	179.5	14.5225	139.009	82.0649	FALSE	TRUE	1	0	0	0	0	FALSE	a	0	9
YY000498	ANQ	65.0048	M	CC	current	no	18.4592	0.864198	175.333	100	0.66	4.98	1.71	7.61	683.232	10.74	3.36	98.7748	8.657	31.1	8.576	21.0986	111.927	123.218	8.7525	145.676	89.8789	FALSE	TRUE	1	0	0	0	0	FALSE	a	1	9
YY000564	ANQ	61.1143	F	CT	no	no	19.3685	0.844444	153.333	98	1.3	4.37	1.08	9.098	399.285	10.37	4.82	99.8442	6.868	52.7	17.404	21.0917	109.062	122.108	9.6575	143.958	84.4821	FALSE	FALSE	1	0	0	0	0	FALSE	b	1	10
YY001419	ANQ	61.1526	F	CC	current	past	19.428	0.771739	170	88.6667	1.21	4.44	1.55	20.138	404.738	10.72	4.82	83.5274	8.99	82.6	29.13	19.2608	90.565	142.347	6.2575	141.104	81.9835	FALSE	FALSE	0	0	0	0	0	FALSE	b	0	10
YY000588	ANQ	66.5352	F	CC	no	no	25.721	0.819048	177.333	97.3333	2.38	5.21	1.31	10.385	409.111	9.84	4.19	95.6189	11.544	69.5	28.372	17.4113	89.535	118.33	8.445	157.597	87.7415	FALSE	FALSE	1	1	0	0	0	FALSE	a	1	11
YY001027	ANQ	66.3518	F	CT	no	no	19.9381	0.783133	160	93.3333	0.93	6.12	1.65	8.543	595.806	11.67	5.2	91.9074	19.911	79.9	23.16	23.085	107.98	137.157	11.28	138.514	75.4142	FALSE	FALSE	0	0	0	0	0	FALSE	a	0	11
YY000592	ANQ	56.0137	F	CT	no	no	21.4844	0.83871	171.333	91.3333	1.47	5.77	1.25	7.083	515.667	15.46	6.22	88.9684	8.831	62.2	19.186	17.5001	107.005	130.183	8.51	150.767	84.4651	FALSE	FALSE	1	0	0	0	0	TRUE	b	1	12
YY001449	ANQ	56.0383	F	CT	no	current	21.7718	0.903226	176.667	100	3.45	5.86	1.09	12.835	550.265	8.84	4.6	102.936	15.501	78.8	23.727	18.4642	81.0325	126.382	8.135	140.606	87.8375	FALSE	TRUE	1	1	0	0	0	FALSE	b	0	12
YY000604	ANQ	55.937	M	CC	current	no	21.7047	0.850575	176.667	80	1.79	5.75	1.59	10.783	255.5	17.77	9.44	88.6799	13.775	54	17.173	17.0599	81.0175	103.045	7.37	152.99	74.4152	FALSE	FALSE	1	0	0	0	0	FALSE	b	1	13
YY001010	ANQ	55.9589	M	TT	current	past	19.5476	0.793103	166.667	96.6667	1.02	4.85	1.29	9.595	360.175	15.97	4.97	67.8563	9.839	66.3	21.106	21.3127	92.9	173.213	9.67	156.364	93.8265	FALSE	FALSE	1	0	0	0	0	FALSE	b	0	13
YY000590	ANQ	61.4648	M	CC	no	no	19.415	0.824176	172.667	98.6667	1.24	4.49	1.23	9.078	425.257	15.73	4.19	91.4211	7.853	81.9	19.303	13.8328	80.7175	116.02	6.4575	138.26	84.9911	FALSE	FALSE	1	1	0	0	0	FALSE	a	0	14
YY000664	ANQ	61.462	M	TT	no	no	23.8751	0.886598	150	100	1.34	6.64	1.38	5.53	262.408	17.31	4.55	84.0979	9.462	75.3	25.405	19.5257	88.815	148.968	8.4125	142.328	88.0812	FALSE	TRUE	1	0	0	0	0	FALSE	a	1	14
YY000714	ANQ	69.8864	F	CT	current	no	16.6659	0.845238	142	61.3333	0.84	4.57	1.47	11.085	337.685	10.02	8.47	79.4044	10.373	53.2	17.555	17.8878	101.325	136.53	6.4175	138.546	74.5764	FALSE	FALSE	0	0	1	0	0	FALSE	b	1	15
YY001414	ANQ	69.9274	F	CT	no	no	24.2382	0.912088	160	91.3333	1.44	5.28	1.29	9.089	297.653	12.96	4.95	58.6874	8.347	93.2	25.332	22.6828	100.845	153.11	9.3625	121.82	80.5335	FALSE	FALSE	1	0	0	0	0	FALSE	b	0	15
YY000538	ANQ	65.9192	F	CT	no	no	21.5169	0.894118	160	100	1.6	4.83	1.91	8.931	419.621	12.04	4.82	93.3633	8.719	139.4	20.44	16.7639	81.185	120.623	7.4775	143.978	83.3363	FALSE	FALSE	1	0	0	0	0	FALSE	a	0	16
YY000888	ANQ	65.9822	F	CC	no	no	24.8358	0.875	163.333	70.6667	1.22	5.67	1.51	9.493	516.075	10.06	5.33	97.188	11.033	44.5	18.033	15.0258	143.268	103.845	7.8775	155.594	80.9835	FALSE	FALSE	1	0	0	0	0	FALSE	a	1	16
YY000614	ANQ	68.5667	F	TT	no	no	20.2694	0.847826	161.333	78.6667	3.44	9.36	1.42	8.084	326.824	10.35	5.19	91.5356	16.285	78.7	26.657	19.0696	95.84	200.123	8.1975	140.663	77.8614	FALSE	FALSE	1	0	0	0	0	FALSE	a	0	17
YY001001	ANQ	68.4682	F	CT	no	no	29.9643	0.971154	160	100	1.04	4.77	1.4	11.349	320.683	17.02	7.35	72.8122	8.369	47.5	9.575	20.3718	95.745	107.05	10.11	148.265	79.163	FALSE	FALSE	0	0	0	0	0	FALSE	a	1	17
YY001058	ANQ	54.6229	F	CC	no	no	26.5754	0.804124	180	100	1.97	6.42	1.38	8.744	422.752	10.91	5.01	81.3273	10.169	63.1	19.749	22.4692	151.583	186.96	11.6175	140.667	85.6667	FALSE	TRUE	0	0	0	0	0	FALSE	b	1	18
YY001062	ANQ	54.6995	F	CT	no	current	26.8889	0.814433	174	84	1.43	6.82	1.31	15.524	333.979	9.92	6.1	99.1893	21.566	105.4	22.699	18.8087	92.8	138.757	11.195	142.863	68.216	FALSE	FALSE	1	0	0	0	0	FALSE	b	0	18
YY000845	ANQ	59.7372	F	CC	no	no	22.6326	0.918367	144	68.6667	0.79	4.83	1.35	7.367	528.723	12.24	4.25	92.8926	11.543	44.4	20.584	17.6705	91.68	115.562	6.755	131.978	70.3859	FALSE	TRUE	1	0	0	0	0	FALSE	a	0	19
YY001097	ANQ	59.9288	F	CC	no	no	23.8092	0.825581	145.333	80	1.08	4.73	1.3	12.437	465.811	10.97	4.87	70.5874	6.195	48.6	10.967	33.3279	157.63	172.12	16.79	132.43	76.0529	FALSE	FALSE	1	0	0	0	0	FALSE	a	1	19
YY001252	ANQ	57.5387	F	CC	no	no	22.3734	0.802083	150.667	76	1.12	4.93	1.51	6.625	386.469	10.5	5.51	97.2306	11.863	104.5	18.292	16.3295	116.612	129.585	8.115	130.641	74.8028	FALSE	FALSE	1	0	0	0	0	FALSE	a	1	20
YY001257	ANQ	57.4867	F	CC	no	no	26.9451	0.871287	160	84	1.04	4.3	1.19	7.857	590.478	12.63	5.61	103.44	11.007	66.7	20.971	20.0071	125.81	137.34	23.7225	134.575	78.2815	FALSE	TRUE	0	0	0	0	0	FALSE	a	0	20
YY001002	ANQ	61.796	M	TT	past	no	23.4052	0.894737	160.667	91.3333	1.37	4.99	1.24	3.908	527.079	20.04	5.38	81.6982	10.58	47	26.214	16.5608	91.99	126.68	7.66	144.032	90.1029	FALSE	FALSE	1	0	0	0	0	FALSE	a	0	21
YY001296	ANQ	61.7248	M	CT	no	no	14.8809	0.7875	179.333	108	1.73	5.83	1.58	4.877	373.825	12.46	5.86	90.4305	10.876	67.5	22.786	18.5359	86.68	151.583	7.3225	163	106.333	FALSE	TRUE	1	0	0	1	0	FALSE	a	1	21
YY000790	ANQ	68.7556	F	CC	no	no	18.4548	0.788889	173.333	78.6667	1.06	3.66	1.13	9.705	558.077	11.27	4.6	70.6681	4.137	56.6	16.654	26.0418	117.088	166.475	10.9975	137.615	68.2914	FALSE	FALSE	1	0	0	0	0	FALSE	a	0	22
YY001321	ANQ	68.5832	F	TT	no	no	20.8331	0.88764	160	88.6667	1.05	4.58	1.34	11.6	325.539	12.64	4.32	81.007	19.167	63.9	26.55	24.5039	113.865	161.995	10.7	146.112	87.8811	FALSE	TRUE	1	0	0	0	0	FALSE	a	1	22
YY001357	ANQ	51.0856	F	CC	no	no	25.711	0.895833	141.333	90.6667	1.73	5.17	1.29	6.297	373.422	10.88	4.79	102.196	11.196	64.8	24.22	24.2847	115.103	154.775	10.855	141.704	86.6903	FALSE	FALSE	0	0	0	0	0	FALSE	a	1	23
YY001511	ANQ	51.0582	F	CT	no	no	22.0035	0.778947	162.667	87.3333	2	7.54	1.08	9.358	213.308	10.55	5.91	94.3486	18.839	56.2	22.3	19.7995	102.545	190.565	8.515	134.62	76.8981	FALSE	FALSE	1	0	0	0	0	FALSE	a	0	23
YY001390	ANQ	71.2088	M	CC	past	current	21.1203	0.836957	176.667	96	1.31	4.65	1.02	9.196	217.135	11.23	5.05	90.729	9.618	50.7	23.984	18.4308	84.5775	115.385	5.5825	161.977	96.8945	FALSE	FALSE	0	0	0	0	0	FALSE	b	1	24
YY001629	ANQ	70.9213	M	CC	current	current	17.6005	0.823529	139.333	82.6667	0.71	3.23	1.16	9.136	455.783	11.97	4.52	93.0571	4.968	28.8	12.309	18.0435	98.3775	112.325	7.1725	124.212	73.443	FALSE	TRUE	1	0	0	0	0	FALSE	b	0	24
YY000606	ANQ	62.7023	F	CT	no	no	24.3952	0.824176	148.667	80	1.18	4.14	1.53	8.228	362.124	9.75	5.17	84.1185	7.009	40.5	20.288	16.5923	97.42	95.7125	10.46	139.024	81.0609	FALSE	FALSE	0	0	0	0	0	FALSE	b	0	25
YY001397	ANQ	62.6995	F	CT	no	no	19.7784	0.744444	176.667	90	0.96	7.22	1.21	11.182	212.101	10.55	7.04	90.2827	11.54	66.2	25.044	20.1505	104.38	140.357	8.4975	162.141	90.0647	FALSE	TRUE	1	0	0	0	0	FALSE	b	1	25
YY001186	ANQ	57.7851	F	CC	no	no	24.9896	0.852632	158.667	84.6667	1.83	6.67	1.59	11.543	303.231	9.3	5.44	103.783	12.052	94.3	24.476	23.6093	104.263	193.593	11.4775	136.998	81.3404	FALSE	TRUE	0	0	0	0	0	FALSE	b	0	26
YY001427	ANQ	57.9247	F	CT	no	no	21.5731	0.782609	170.667	100	2.47	7	1.65	9.944	323.741	11.34	5.39	91.7773	19.409	76	18.649	19.9394	97.4525	296.88	8.325	150.169	92.2026	FALSE	FALSE	0	0	0	0	0	FALSE	b	1	26
YY001353	ANQ	68.7502	F	CT	no	no	22.6734	0.855556	175.333	88.6667	1.04	4.65	1.34	9.318	470.036	9.1	6.73	94.8151	11.092	38.8	14.189	20.1389	104.453	133.993	9.485	151.905	82.1248	FALSE	FALSE	0	0	0	0	0	FALSE	a	0	27
YY001453	ANQ	68.6735	F	CT	no	no	18.4444	0.813953	161.333	79.3333	1.5	3.98	1.5	7.227	380.011	13.59	3.87	64.4923	12.375	44.9	26.668	23.4305	91.355	122.703	6.895	160.218	91.042	FALSE	FALSE	0	0	0	0	0	FALSE	a	1	27
YY001454	ANQ	71.3073	M	CT	no	no	23.6244	0.904255	146	78.6667	0.88	4.34	1.19	12.641	280.722	11.86	6.8	90.5582	8.515	59.9	9.159	15.6036	62.2525	119.052	6.6175	142.799	79.1549	FALSE	TRUE	1	0	1	0	0	FALSE	b	1	28
YY001668	ANQ	71.3812	M	CC	current	current	17.4251	0.853659	170	78	0.91	3.42	1.12	17.24	430.297	11.26	4.68	95.4635	7.206	45.2	28.123	19.8146	90.245	149.5	8.1025	153.663	77.5835	FALSE	FALSE	1	0	0	0	0	FALSE	b	0	28
YY001341	ANQ	68.115	F	TT	no	no	26.0368	0.954545	148	68.6667	1.07	5.46	1.37	7.992	321.283	11.16	5.19	89.7236	9.252	43	14.728	22.3366	112.72	129.067	8.7325	135.233	70.2961	FALSE	FALSE	1	0	0	0	0	FALSE	a	0	29
YY001497	ANQ	68.2491	F	TT	no	no	21.312	0.8	168.667	98.6667	0.97	4.66	1.12	9.887	307.787	12.05	5.14	98.6275	9.838	58.4	21.02	17.2248	116.017	110.972	8.665	161.591	80.3654	FALSE	TRUE	1	0	0	0	0	FALSE	a	1	29
YY001572	ANQ	64.4682	M	CC	current	current	18.026	0.825	162.667	92	1.03	5.33	1.51	10.065	213.089	10.72	4.71	97.1276	12.256	51.9	32.864	19.2643	93.795	102.287	9.34	124	99.3333	FALSE	FALSE	0	0	0	0	0	FALSE	a	1	30
YY001648	ANQ	64.4079	M	CT	no	past	27.1514	0.909091	177.333	94.6667	1.01	4.15	1.02	5.626	205.279	18.98	5.19	78.8998	8.732	54.4	32.34	22.4909	118.85	132.735	8.795	144.745	81.4129	FALSE	FALSE	1	1	0	0	0	FALSE	a	0	30
YY001743	ANQ	49.9247	M	CC	current	current	22.1828	0.777778	126	84	1.03	4.63	1.43	11.501	358.922	15.42	4.79	102.542	12.202	60.7	30.304	18.104	91.965	118.335	10.6325	123.952	76.582	FALSE	TRUE	0	0	0	0	0	FALSE	b	0	31
YY001962	ANQ	50.3655	M	CT	current	no	21.9098	0.824176	148	100	1.84	4.68	1.33	9.54	322.32	19.7	4.24	80.8538	7.742	68	27.598	21.176	127.713	132.857	8.9675	146.69	95.5586	FALSE	TRUE	0	0	0	0	0	FALSE	b	1	31
YY001883	ANQ	58.3272	F	CC	no	no	22.2905	0.824176	158	62.6667	1.95	3.13	1.24	8.041	340.757	10.07	5	99.004	5.623	30.9	23.615	13.8374	67.2275	87.4275	4.8325	137.584	82.5782	FALSE	FALSE	0	0	0	0	0	FALSE	b	0	32
YY002047	ANQ	58.4641	F	TT	no	no	29.0732	0.881818	166.667	99.3333	2.12	4.47	1.06	4.754	191.971	17.8	4.88	80.7849	5.881	67.7	12.51	20.4488	102.058	106.237	9.83	161.671	93.0285	FALSE	FALSE	1	0	0	0	0	FALSE	b	1	32
YY001821	ANQ	66.5791	F	TT	no	no	28.8754	0.815534	169.333	84.6667	1.32	5.97	1.45	8.004	467.534	12.99	5.09	94.9854	13.899	71.9	22.355	18.3535	112.918	120.948	7.675	147.881	78.0657	FALSE	FALSE	1	0	0	0	0	FALSE	b	0	33
YY002052	ANQ	66.6366	F	TT	no	no	24.6669	0.958763	167.333	94.6667	2.48	3.54	0.81	13.607	244.417	13.31	5.1	81.238	7.226	56	10.191	28.6197	136.235	126.405	13.035	151.065	84.2948	FALSE	TRUE	1	0	0	0	0	FALSE	b	1	33
YY002042	ANQ	45.295	F	CT	no	no	26.6728	0.855769	147.333	84.6667	1.15	3.53	1.07	6.001	352.286	8.16	4.3	107.982	6.374	56.7	11.452	19.0403	105.252	90.475	8.535	124.341	79.2598	FALSE	TRUE	0	0	0	0	0	FALSE	a	0	34
YY002056	ANQ	45.0103	F	CC	no	current	26.1523	0.852941	150	90	1.42	5.03	1.38	10.006	362.785	10.11	4.39	115.447	8.086	58.5	8.498	22.7066	105.95	96.465	9.065	132.463	81.642	FALSE	FALSE	0	0	0	0	0	FALSE	a	1	34
YY002203	ANQ	66.5927	F	CC	no	no	23.4583	0.879121	159.333	88	1.01	5.87	1.35	8.018	345.033	12.11	4.68	87.6791	6.573	51.2	11.902	24.1132	109.498	134.822	12.665	144.039	75.8327	FALSE	TRUE	1	1	0	0	0	FALSE	a	1	35
YY002290	ANQ	66.768	F	CC	no	no	19.4651	0.761364	148	79.3333	1.08	3.5	1.27	11.194	320.644	16.45	4.39	76.9945	7.024	51.3	12.727	28.1903	147.055	144.537	9.9125	131.834	77.6356	FALSE	FALSE	0	0	0	0	0	FALSE	a	0	35
YY002230	ANQ	61.3114	M	CT	no	no	21.9586	0.880435	125.333	80.6667	1.98	5.3	1.37	16.72	401.62	14.53	5.27	86.6338	8.8	88.5	23.325	21.7722	114.377	115.085	11.9625	123.249	84.3941	FALSE	TRUE	1	0	0	0	0	FALSE	a	0	36
YY002264	ANQ	61.3634	M	CT	current	past	21.3967	0.858824	162	92	1.88	5.91	1.46	4.661	311.533	24.79	4.63	91.4861	7.467	62.9	16.674	17.2983	108.175	78.1	4.8175	146.787	88.2814	FALSE	FALSE	1	0	0	0	0	FALSE	a	1	36
YY002231	ANQ	67.9206	M	CT	no	no	25.374	0.969072	178.667	102	2.28	6.23	1.26	5.701	736.56	15.07	5.02	77.7194	9.153	63.4	12.602	27.1824	125.838	131.97	14.21	147.669	94.0627	FALSE	TRUE	1	1	0	0	0	FALSE	a	0	37
YY002332	ANQ	68.1013	M	CT	current	no	18.4911	0.925926	154	72	1.38	4.76	1.38	8.822	105.597	16.87	4.67	88.8279	7.717	47.6	11.943	21.1206	119.022	87.4125	8.08	126.61	73.3955	FALSE	TRUE	1	0	0	0	0	FALSE	a	1	37
YY002337	ANQ	70.538	M	TT	no	no	21.0575	0.765957	168.667	100	1.54	5.01	1.62	5.491	148.65	25.97	5.02	65.6733	8.392	35.6	15.171	24.5709	127.578	98.2125	10.6725	144.182	83.4984	FALSE	FALSE	1	0	0	0	0	FALSE	a	1	38
YY002339	ANQ	70.3107	M	CC	past	current	22.6632	0.873684	155.333	88.6667	1.56	4.56	1.2	11.863	39.58	14.63	4.44	72.3226	9.478	77.2	14.811	26.8814	128.39	126.692	9.9875	142.31	80.5145	FALSE	TRUE	1	0	0	0	0	FALSE	a	0	38
YY002374	ANQ	62.5216	M	CC	current	no	24.6396	0.947917	166	90	1.21	2.99	0.65	6.913	189.362	16.75	4.59	58.9942	6.277	56	9.817	29.739	123.412	120.255	10.9925	165.313	92.666	FALSE	TRUE	0	0	0	0	0	FALSE	b	1	39
YY002550	ANQ	62.757	M	TT	current	current	20.3605	0.906977	154	68.6667	0.72	3.57	1.42	10.477	359.51	22.27	4.88	85.6343	6.173	41.7	13.412	18.8382	104.388	88.725	10.22	140.979	73.5395	FALSE	FALSE	1	0	0	0	0	FALSE	b	0	39
YY002439	ANQ	47.2635	F	CT	no	no	28.1097	0.881188	179.333	96.6667	1.21	3.81	0.88	6.873	495.963	12.24	4.61	108.926	5.58	41.2	11.149	22.2061	116.015	111.815	9.3125	143.834	82.2608	FALSE	FALSE	1	0	0	0	0	FALSE	b	1	40
YY002603	ANQ	46.1875	F	CC	no	no	23.9913	0.887755	122	80	1.17	4.08	1.27	12.555	148.747	8.41	5.2	113.607	9.029	48.4	11.373	18.3784	69.12	74.5725	6.5525	129.158	83.0505	FALSE	TRUE	0	0	0	0	0	FALSE	b	0	40
YY002453	ANQ	63.1704	M	CC	current	past	23.6686	0.846939	162	86.6667	1.07	4.51	0.93	6.148	284.524	12.6	4.22	96.2295	8.723	55.4	10.289	20.4254	95.8525	90.8175	6.5675	160.263	94.6621	FALSE	FALSE	1	0	0	0	0	FALSE	b	1	41
YY002510	ANQ	62.8583	M	CT	current	current	20.047	0.886364	178	86	1.47	5.53	1.77	8.293	545.283	9.94	5.66	93.7932	13.078	64.7	17.148	17.8866	81.32	102.19	8.6875	136.434	78.185	FALSE	TRUE	0	0	0	0	0	FALSE	b	0	41
YY002515	ANQ	56.0876	F	CT	no	no	27.6888	0.865385	171.333	85.3333	1.22	5.08	1.17	4.621	425.519	14.47	5.78	98.0094	7.136	72.9	12.99	23.8868	119.058	119.31	8.2775	136.794	80.3757	FALSE	TRUE	0	0	0	0	0	FALSE	a	1	42
YY002565	ANQ	56.1561	F	CT	no	no	25.9066	0.920792	159.333	80	2.87	4.64	0.99	10.838	340.585	30.25	4.94	63.23	5.695	39.2	10.253	20.6545	96.0425	84.3625	7.14	133.264	79.1357	FALSE	FALSE	1	0	0	0	0	FALSE	a	0	42
YY002541	ANQ	69.7659	M	CC	past	no	18.1343	0.829268	150	60.6667	0.79	3.19	1.07	8.883	541.734	10.34	4.89	85.0796	4.881	26.8	12.907	18.8535	106.953	103.062	9.7275	145.822	64.7059	FALSE	TRUE	1	0	0	0	0	FALSE	b	1	43
YY002627	ANQ	69.9986	M	CC	current	current	18.5675	0.925926	169.333	72	0.87	4	1.69	4.857	353.85	19.33	3.98	70.8013	7.846	68.9	17.572	20.4	72.365	81.5825	8.3975	124.822	63.8651	FALSE	FALSE	0	0	0	0	0	FALSE	b	0	43
YY002268	ANQ	56.5969	F	CC	no	no	18.024	0.858974	158	86.6667	2.36	3.96	1.34	6.917	558.238	8.24	4.16	109.067	10.785	73.4	13.651	23.7822	115.675	137.485	16.115	141.028	79.0984	FALSE	FALSE	0	0	0	0	0	FALSE	a	0	44
YY002561	ANQ	56.7392	F	CT	no	no	21.3333	0.875	153.333	76	1.15	4.37	1.33	8.526	531.608	12.44	5.16	96.354	8.781	73.8	9.915	18.1515	79.8025	99.065	5.9425	148.91	81.8333	FALSE	FALSE	1	0	0	0	0	FALSE	a	1	44
YY002191	ANQ	63.4196	F	CC	no	current	22.2366	0.901099	167.333	85.3333	1.22	5.29	1.26	14.844	483.991	11.24	4.8	89.4842	8.461	50	11.911	21.8537	157.78	105.267	12.5675	152.01	88.4055	FALSE	FALSE	1	0	0	0	0	FALSE	b	0	45
YY002643	ANQ	63.4415	F	TT	no	current	26.8006	0.881188	152.667	96	1.2	5.9	1.31	5.589	284.971	17.92	5.02	88.9605	9.055	62.1	14.224	21.3755	135.208	75.3575	8.3775	143.232	89.194	FALSE	FALSE	1	0	0	0	0	FALSE	b	1	45
YY002579	ANQ	58.6694	F	TT	no	no	22.5161	0.840426	144	86	1.45	3.99	0.94	11.945	363.8	15.75	4.79	98.0114	12.751	81.5	13.017	19.3289	91.415	95.79	7.3525	141.326	80.5322	FALSE	FALSE	1	0	0	0	0	FALSE	a	0	46
YY002668	ANQ	58.5927	F	CC	no	no	25.2713	0.836957	171.333	84.6667	2.05	4.12	1.07	11.313	359.828	12.96	5.08	87.3711	8.17	56.4	12.104	19.3087	127.802	109.755	8.975	131.344	86.7066	FALSE	FALSE	0	0	0	0	0	FALSE	a	1	46
YY002861	ANQ	58.0424	F	CT	no	no	22.5586	1.01163	162	80	2.44	4.68	1.03	17.143	137.623	11.59	4.17	101.562	12.882	75.6	17.764	17.8682	104.86	99.9725	7.6	131.653	77.4092	FALSE	TRUE	1	0	0	0	0	FALSE	b	0	47
YY002896	ANQ	58.1875	F	CC	no	no	22.1907	0.916667	170.667	81.3333	7.55	5.16	0.76	15.685	272.446	10.51	5.14	104.643	8.448	58.2	5.671	20.0596	92.305	108.888	6.2175	144.846	80.5796	FALSE	FALSE	1	0	1	0	0	FALSE	b	1	47
YY003050	ANQ	71.6934	F	CT	no	no	23.0609	0.876404	157.333	80.6667	1.36	6.05	1.44	22.49	667.586	14.53	5.08	86.2402	22.635	77.1	15.955	18.0533	65.6375	75.61	4.0725	144.333	70.6667	FALSE	FALSE	0	0	0	0	0	FALSE	b	1	48
YY003118	ANQ	71.5099	F	CT	no	no	17.5668	0.759494	134	74	1.59	4.48	1.28	12.885	395.332	11.66	4.87	78.2228	8.896	79.5	8.287	19.6457	80.0575	108.802	7.95	132.709	72.5622	TRUE	TRUE	1	0	1	0	0	TRUE	b	0	48
YY003259	ANQ	70.8611	F	CC	no	no	20.8889	0.975904	122	100.667	1.17	4.62	1.55	10.776	390.675	16.93	4.76	80.1568	11.491	62.7	11.369	19.9792	147.215	94.8725	9.4125	136.666	86.6158	FALSE	FALSE	1	0	0	0	0	FALSE	b	1	49
YY003414	ANQ	70.7953	F	CT	no	no	28.1583	0.87963	149.333	83.3333	1.9	5.79	1.05	10.492	324.297	12.66	6.06	91.2499	8.444	80.5	19.841	18.029	78.4425	98.9325	4.6475	153.787	80.9994	FALSE	FALSE	1	0	0	0	0	TRUE	b	0	49
YY003307	ANQ	60.6434	M	CC	no	no	18.1726	0.829268	164	96.6667	1.08	5.82	1.36	7.526	312.08	17.4	4.38	90.5743	11.955	99.6	13.724	18.8595	139.882	100.487	6.345	152.836	87.7853	FALSE	FALSE	1	1	0	0	0	FALSE	a	1	50
YY003543	ANQ	60.8296	M	CT	no	no	21.2585	0.847826	158	99.3333	1.58	6.41	1.51	13.812	375.843	13.81	5.26	95.9514	11.976	103.2	34.224	17.0124	74.9325	85.59	8.485	127.833	84.4974	FALSE	FALSE	1	0	0	0	0	FALSE	a	0	50
YY003395	ANQ	63.9316	F	CT	no	no	19.9509	0.875	168	80	0.85	5.23	1.53	13.773	359.199	12.52	5.41	87.325	11.563	51.9	23.742	17.5059	102.918	76.82	6.7425	156.223	77.1007	FALSE	FALSE	1	1	0	0	0	FALSE	a	1	51
YY003502	ANQ	64.0274	F	CC	no	no	28.3718	0.863636	157.333	83.3333	1.46	5.54	1.4	13.53	447.837	13.69	4.66	89.2734	6.822	81.8	23.106	17.1195	94.855	102.02	10.49	133.453	80.1525	FALSE	FALSE	1	0	0	0	0	FALSE	a	0	51
YY003153	ANQ	63.8877	F	CC	no	no	23.2422	1.02105	158	87.3333	2.4	4.72	1.08	6.378	579.711	9.57	5.55	89.0204	9.09	67.6	13.235	18.9183	82.8025	99.035	6.005	124.857	75.7735	FALSE	FALSE	0	0	0	0	0	FALSE	a	0	52
YY003522	ANQ	63.8604	F	CC	no	no	19.6577	0.8125	128	79.3333	1.64	5.13	1.49	8.206	445.755	15.19	4.81	89.0375	7.576	55.4	31.388	20.0569	109.912	94.6125	7.9675	133.311	81.733	FALSE	TRUE	1	0	0	0	0	FALSE	a	1	52
YY003281	ANQ	67.9945	M	CC	current	current	23.4662	0.965517	126	86	1.1	5.38	1.37	8.963	413.064	17.92	4.94	95.474	12.378	131.1	23.344	19.2556	77.215	84.5775	8.275	121.667	75.6667	FALSE	TRUE	0	0	0	0	0	FALSE	a	0	53
YY003558	ANQ	67.6249	M	CC	current	no	20.1761	0.833333	158.667	89.3333	0.69	3.28	1.45	10.93	503.907	10.96	6.22	96.2784	5.947	67	34.473	16.7462	74.64	78.1375	6.5525	140.317	82.0976	FALSE	FALSE	0	0	0	1	0	FALSE	a	1	53
YY003611	ANQ	60.219	F	CT	no	no	17.5752	0.8	152	83.3333	1.27	4.78	1.78	17.438	434.217	14.47	4.84	87.1716	6.552	64.6	20.748	20.6916	119.983	104.23	8.74	143.676	78.3941	FALSE	FALSE	1	0	0	0	0	FALSE	a	1	54
YY003700	ANQ	60.1177	F	CC	no	no	20.3973	0.824176	150.667	89.3333	1.57	4.42	1.57	12.221	448.95	9.16	4.44	74.9673	7.089	38.3	19.328	19.4899	94.635	109.507	8.45	131.918	80.7242	FALSE	FALSE	1	0	0	0	0	FALSE	a	0	54
YY003482	ANQ	71.0171	F	CC	no	no	15.9021	0.851852	168.667	80.6667	1.9	6.42	1.44	5.521	239.36	15.02	5.52	96.0329	8.121	57.8	24.372	20.2508	109.578	102.145	10.1375	160.674	87.8539	FALSE	TRUE	0	0	0	0	0	FALSE	b	0	55
YY003709	ANQ	71.1458	F	CT	no	no	19.6676	0.855422	172	98.6667	0.88	4.98	1.83	13.299	499.699	10.62	5.08	79.1313	6.037	50.7	15.616	17.4321	129.75	88.545	9.1575	140.923	89.664	FALSE	FALSE	1	0	0	0	0	FALSE	b	1	55
YY003669	ANQ	67.2526	M	CC	current	current	25.7741	0.989691	154.667	81.3333	2.93	4.94	1.09	8.656	279.86	11.96	4.61	95.7895	7.232	68.5	28.558	19.8806	65.725	120.472	5.5125	134.186	76.484	FALSE	FALSE	1	1	0	0	0	FALSE	a	0	56
YY003747	ANQ	67.4579	M	CT	current	past	17.6866	0.807692	142	76	0.96	5.35	1.67	13.972	303.37	14.77	5.32	56.4434	9.674	83.5	20.04	16.7714	98.9025	119.582	9.3825	139.777	80.6871	FALSE	TRUE	0	0	0	0	0	FALSE	a	1	56
YY003312	ANQ	49.8727	F	CT	no	no	22.6595	0.88	176.667	104.667	0.77	2.72	1.12	17.855	434.201	15.6	5.07	86.5479	6.662	62.9	14.619	17.4618	87.3075	96.8825	6.325	130.626	82.9461	FALSE	TRUE	1	0	0	0	0	FALSE	a	0	57
YY003787	ANQ	50.0397	F	CC	no	no	21.7399	0.835165	158	82.6667	0.97	3.93	1.19	17.78	477.976	7.58	4.67	106.488	6.905	30.4	27.766	17.5174	77.1525	112.972	6.3625	151.163	92.4359	FALSE	FALSE	1	0	0	0	0	FALSE	a	1	57
YY003841	ANQ	55.6879	F	CC	no	no	28.1221	0.90099	149.333	90.6667	2.36	5.28	1.47	12.548	488.992	11.44	4.13	108.201	8.013	52.5	23.025	20.2504	124.265	126.668	9.185	119.667	79	FALSE	FALSE	0	0	0	0	0	FALSE	a	1	58
YY004152	ANQ	55.7919	F	TT	no	no	22.4744	0.875	148.667	85.3333	1.36	6.46	1.38	15.524	581.209	7.33	4.87	101.578	8.516	63	16.462	16.4514	105.647	87.4075	9.8825	128.524	81.261	FALSE	FALSE	0	0	0	0	0	FALSE	a	0	58
YY003847	ANQ	68.8241	F	CT	no	no	25.1305	0.936842	150.667	96.6667	1.2	4.3	1.63	8.259	567.733	14.67	5.16	75.3716	8.811	60.1	21.522	19.9749	101.31	97.6975	8.3625	124.847	76.3924	FALSE	FALSE	0	0	0	0	0	FALSE	b	1	59
YY004520	ANQ	68.9473	F	CT	no	no	21.8929	0.836735	154.667	92	2.21	4.56	0.99	18.759	338.946	12.88	4.84	89.2981	7.763	42	30.112	25.4503	141.23	129.222	10.7975	138.089	80.7008	FALSE	FALSE	0	0	0	0	0	FALSE	b	0	59
YY004005	ANQ	70.5572	F	TT	current	current	19.736	0.917647	144.667	84	0.82	3.34	1.38	5.572	212.411	13.37	5.25	93.3755	5.368	44.8	18.791	21.4714	126.51	113.415	8.605	150.138	89.4513	FALSE	FALSE	1	0	0	0	0	FALSE	a	0	60
YY004090	ANQ	70.4887	F	CC	no	no	25.4877	0.915789	170.667	92	1.82	5.62	1.26	12.526	350.134	17.41	5.87	93.0596	7.651	68.1	25.842	18.6331	84.7025	94.6825	6.4275	186.758	91.839	FALSE	FALSE	1	0	0	0	0	FALSE	a	1	60
YY004343	ANQ	70.8474	M	CT	current	no	21.1235	0.939759	135.333	71.3333	0.75	4.26	1.4	9.523	622.87	15.41	6.43	80.7863	9.411	88.2	32.152	20.128	120.97	99.8675	15.175	125	70	FALSE	TRUE	0	0	0	0	0	FALSE	a	0	61
YY004554	ANQ	70.9158	M	CC	no	no	21.0641	0.846154	158	107.333	1.24	3.74	1.25	9.606	327.724	13.23	4.98	88.8816	8.695	42.7	18.365	23.5323	136.66	111.118	13.005	140	86	FALSE	FALSE	1	0	0	0	0	FALSE	a	1	61
YY004439	ANQ	67.1923	M	TT	no	no	26.1752	0.9	179.333	90.6667	1.05	5.31	1.37	10.553	337.158	19.13	4.84	88.733	6.91	69.9	22.543	19.8992	125.037	118.525	10.165	134.648	80.4545	FALSE	TRUE	1	0	0	0	0	FALSE	b	0	62
YY004557	ANQ	67.1814	M	CC	current	no	24.5378	0.904255	142.667	89.3333	0.96	4.64	1.19	22.35	150.683	16.71	4.84	74.4193	7.312	44	41.56	19.0266	80.83	97.1725	10.88	169.333	103.333	FALSE	TRUE	0	0	0	0	0	FALSE	b	1	62
YY003878	ANQ	64.2738	M	CT	past	no	22.2564	0.898876	157.333	79.3333	1.1	5	1.54	9.684	614.927	12.24	5.34	90.8593	4.743	54.4	12.783	18.8474	116.29	102.922	10.48	130.851	76.3238	FALSE	TRUE	1	0	0	0	0	FALSE	a	0	63
YY004563	ANQ	64.3258	M	CT	current	current	21.2526	0.9375	173.333	92	1.23	6.52	2.29	12.458	585.167	16.66	5.71	91.5109	9.633	66.9	20.171	16.1296	180.183	88.915	10.3325	155.687	85.9727	FALSE	FALSE	1	0	0	0	0	FALSE	a	1	63
YY004731	ANQ	72.8953	M	CT	no	no	16.5331	0.853933	154	78	1.07	4.5	1.23	12.911	305.283	16.5	4.45	86.6833	8.127	79.1	15.07	18.5771	121.22	121.287	7.5175	147.128	73.8205	FALSE	TRUE	1	1	0	0	0	FALSE	b	0	64
YY004739	ANQ	72.7995	M	CC	current	current	23.4809	0.882353	154	89.3333	1.03	4.96	1.52	11.099	463.672	11.78	4.42	91.5491	9.034	68.8	14.871	18.894	108.778	80.535	9.325	141.438	86.1551	FALSE	TRUE	1	0	0	0	0	FALSE	b	1	64
YY004775	ANQ	61.755	F	TT	no	current	19.1346	0.964706	147.333	90.6667	1.07	4.51	1.47	14.849	347.738	10.98	4.96	92.6561	7.185	62.5	11.359	22.0629	111.18	109.537	11.805	128.326	86.756	FALSE	FALSE	0	0	0	0	0	FALSE	a	0	65
YY004852	ANQ	61.6619	F	CC	no	no	19.4028	0.811111	185.333	87.3333	0.77	4.64	1.57	12.426	526.377	8.79	5.25	94.9857	12.359	69.5	16.771	33.0831	154.137	156.73	11.9225	126.77	73.8449	FALSE	FALSE	1	0	0	0	0	FALSE	a	1	65
YY004987	ANQ	65.9411	F	CT	no	no	27.2305	1	181.333	88.6667	3.32	5.44	0.93	11.859	298.363	12.11	4.73	103.767	6.956	41.1	19.76	16.34	72.0575	108.72	5.9975	154.108	91.3192	FALSE	FALSE	1	1	0	0	0	FALSE	b	1	66
YY004997	ANQ	65.796	F	CC	no	no	18.081	0.77381	168	100.667	1	4.64	1.6	9.04	273.907	11.97	4.54	93.1712	8.574	57.5	16.529	25.825	121.3	116.407	9.5	135.247	84.1856	FALSE	FALSE	1	0	0	0	0	FALSE	b	0	66
YY004875	ANQ	61.4757	M	CC	current	current	19.2001	0.813953	164.667	91.3333	1.05	5.36	2.07	7.968	629.907	15.56	4.73	84.4483	11.559	103.9	17.837	15.1756	82.83	92.815	8.09	131.457	81.08	FALSE	FALSE	1	0	0	0	0	FALSE	a	0	67
YY005002	ANQ	61.588	M	CC	no	no	23.2464	0.89011	150	78.6667	1.12	5.51	1.46	7.979	442.516	14.85	5.18	86.717	8.365	85.3	22.09	18.287	94.4375	97.5075	7.7	143.849	71.9829	FALSE	TRUE	1	0	0	0	0	FALSE	a	1	67
YY004995	ANQ	70.0178	M	CC	no	past	17.7157	0.788235	189.333	104	0.91	5.04	2.01	13.68	155.979	13.12	3.97	82.6914	4.351	29.2	21.322	14.6044	65.325	73.94	5.52	129.493	83.3162	FALSE	TRUE	1	0	0	0	0	FALSE	a	0	68
YY005078	ANQ	69.9849	M	CT	current	current	20.0221	0.932584	213.333	110.667	0.79	4.23	1.88	11.13	645.654	12.69	4.54	87.3793	12.786	60.6	27.373	23.8665	118.877	119.293	11.6825	162.043	100.916	FALSE	FALSE	1	1	0	0	0	FALSE	a	1	68
YY004908	ANQ	68.7283	M	CT	current	no	26.5347	0.969072	155.333	96	1.29	5.42	1.24	6.532	281.778	15.32	4.78	88.6762	1.512	66.1	21.369	21.1147	99.415	129.558	9.06	142.801	86.5128	FALSE	FALSE	1	1	0	0	0	FALSE	b	0	69
YY005097	ANQ	68.8433	M	CT	no	current	20.4998	0.860465	174	79.3333	1.44	3.88	1.38	8.658	554.108	16.81	4.49	90.4409	12.336	107	20.196	15.4018	78.455	91.1725	7.305	132.667	79.3333	FALSE	FALSE	0	0	0	0	0	FALSE	b	1	69
YY004756	ANQ	70.8419	M	CT	current	past	18.5771	0.891566	182.667	114.667	1.77	5.48	0.91	11.333	388.94	19.47	4.71	85.9901	7.672	63.6	28.87	14.6295	84.725	84.43	6.285	135.031	86.2885	FALSE	FALSE	1	0	0	0	0	FALSE	a	0	70
YY005099	ANQ	70.8693	M	CC	current	current	19.7036	0.808989	182.667	81.3333	1.1	5.52	1.42	10.319	406.662	14.76	5.26	92.5672	9.402	47.1	39.17	15.4753	54.935	77.4375	5.215	141.408	68.41	FALSE	FALSE	1	1	0	0	0	FALSE	a	1	70
YY005335	ANQ	56.6434	M	TT	no	current	19.5418	0.880952	159.333	99.3333	2.28	5.26	1.06	9.989	612.726	13.21	7.36	98.6457	11.544	70	22.986	18.8922	67.54	107.517	9.33	164.578	95.4251	FALSE	TRUE	1	0	0	0	0	FALSE	a	1	71
YY005967	ANQ	56.6817	M	CT	current	current	22.2063	0.793478	176	106.667	0.9	5.96	1.93	14.669	372.422	12.98	4.79	98.6754	12.637	150.7	42.143	18.0592	69.8575	93.9275	7.7075	137.607	90.7709	FALSE	FALSE	1	1	0	0	0	FALSE	a	0	71
YY005557	ANQ	53.0623	F	CC	no	no	26.7738	0.969072	180.667	88.6667	2.7	3.68	0.9	14.264	530.568	6.42	4.35	102.369	11.155	38	13.549	18.5111	97.8225	98.475	9.855	159	94.3333	FALSE	FALSE	0	0	0	0	0	FALSE	b	1	72
YY007414	ANQ	53.0623	F	CC	no	no	22.0456	0.855556	150	88.6667	1.64	4.19	1.22	10.8	466.636	14.48	4.3	102.919	7.679	58.4	33.139	31.0613	187.058	172.817	13.2225	152	88.3333	FALSE	FALSE	0	0	0	0	0	FALSE	b	0	72
YY005581	ANQ	58.8747	M	CT	no	no	21.3081	0.776596	178.667	87.3333	1.03	4.42	1.43	9.365	424.11	20.15	3.95	49.8552	7.989	73.7	28.261	18.4075	77.6175	79.9725	7.53	148.156	78.4405	FALSE	TRUE	1	1	0	0	0	FALSE	a	1	73
YY006060	ANQ	58.9377	M	CC	current	current	23.9168	0.866667	157.333	98.6667	1.17	5.04	1.59	14.526	370.999	14.83	5.27	102.47	11.869	99.5	26.806	15.1966	66.2225	86.6875	7.215	135.478	86.6526	FALSE	FALSE	1	0	0	0	0	FALSE	a	0	73
YY005615	ANQ	68.063	M	CT	no	no	24.4181	0.922222	189.333	97.3333	5.3	9.52	1.3	13.672	398.905	14.36	4.92	99.9858	12.633	128.7	14.689	19.8764	81.5675	103.647	10.7875	144.725	81.4656	FALSE	TRUE	1	1	0	0	0	FALSE	b	1	74
YY006519	ANQ	68.0657	M	CC	no	no	22.7036	0.911111	179.333	89.3333	1.16	4.1	1.11	10.378	496	13.35	5.01	88.0049	5.438	53.4	31.063	18.6744	66.9875	93.855	8.7725	147.136	81.1043	FALSE	TRUE	1	1	0	0	0	FALSE	b	0	74
YY005878	ANQ	69.9603	F	CT	no	no	21.2865	0.9125	159.333	85.3333	1.56	4.7	1.06	11.377	458.474	15.72	5.61	92.1241	10.685	68.5	23.415	18.0472	91.3275	84.9675	7.2475	131.626	69.5734	FALSE	FALSE	1	0	0	0	0	FALSE	b	0	75
YY006020	ANQ	69.974	F	CT	no	no	20.4246	0.888889	152	80.6667	1.29	6.32	1.14	10.017	649.836	16.62	4.98	70.869	17.529	88.2	20.459	19.5419	93.7925	83.375	9.81	130.744	78.0591	FALSE	TRUE	1	0	0	0	0	FALSE	b	1	75
YY006035	ANQ	71.1075	M	CC	current	current	17.1029	0.963855	162	72	0.84	5.1	1.74	22.063	332.051	15.21	4.12	69.8014	11.135	86.1	23.972	18.4734	106.605	81.565	8.21	163.198	67.2521	FALSE	FALSE	1	1	0	1	0	FALSE	b	1	76
YY006770	ANQ	71.1567	M	CC	no	current	19.7979	0.88764	157.333	86.6667	0.88	4.49	1.28	11.483	555.358	13.42	4.65	68.4572	8.109	54.7	21.787	19.1175	108.552	93.4975	9.7175	150.211	78.0049	FALSE	TRUE	1	0	0	0	0	FALSE	b	0	76
YY006059	ANQ	50.3272	F	CC	no	past	26.421	0.95	149.333	98.6667	2.56	6.84	1.34	12.89	379.756	14.51	3.45	89.1734	12.989	87.5	18.423	20.7662	84.98	88.2525	13.0225	162.02	98.293	FALSE	TRUE	1	0	0	0	0	FALSE	b	1	77
YY006559	ANQ	50.3518	F	TT	no	no	29.0245	0.936842	156.667	100	1.09	4.28	1.73	5.113	457.776	19.31	5.71	104.771	7.685	61.7	19.258	18.2358	112.385	121.683	8.41	115.895	77.6311	FALSE	FALSE	1	0	0	0	0	FALSE	b	0	77
YY005662	ANQ	70.4449	M	CC	no	no	21.3177	0.896552	138.667	82	1.1	5.48	1.64	11.392	602.954	13.7	4.66	88.9256	10.147	90.6	28.759	18.1014	88.545	104.677	9.6775	120.877	76.2315	FALSE	TRUE	1	0	0	0	0	FALSE	a	0	78
YY006084	ANQ	70.4367	M	TT	past	no	16.9922	0.860465	194	99.3333	0.95	3.73	0.98	16.773	406.845	13.95	3.29	101.063	4.941	29.8	27.496	17.685	111.662	76.7125	7.285	175	110	FALSE	FALSE	0	0	0	0	0	FALSE	a	1	78
YY006101	ANQ	71.9617	M	CT	past	past	23.5304	0.911111	171.333	78	0.9	5.12	1.57	12.774	563.178	17.34	4.63	87.5915	11.264	66.6	27.06	18.5514	93.675	94.7425	9.3	180	90	FALSE	TRUE	1	0	0	0	0	FALSE	b	1	79
YY006732	ANQ	71.9699	M	CC	current	current	19.9175	0.880952	180.667	80.6667	0.75	4.59	2.13	7.719	392.481	11.39	4.8	86.1693	11.196	54.8	28.515	14.4356	64.49	82.26	5.635	137.217	70.8647	FALSE	TRUE	1	0	0	0	0	FALSE	b	0	79
YY005270	ANQ	61.2621	F	CT	no	no	23.2908	0.977273	187.333	87.3333	1.01	4.3	1.2	8.994	355.933	11.73	4.05	112.076	12.297	74.4	22.395	17.9562	96.6325	83.285	9.3475	171.748	69.758	FALSE	FALSE	1	1	0	0	0	FALSE	b	0	80
YY006145	ANQ	61.2375	F	CT	no	no	23.1046	0.864583	165.333	100.667	1.48	4.91	1.63	10.339	448.681	14.54	4.9	94.2162	8.838	64.6	28.322	17.4295	86.9425	96.055	8.2525	147.069	93.7345	FALSE	TRUE	1	0	0	0	0	FALSE	b	1	80
YY005940	ANQ	60.846	M	CT	past	no	18.8851	0.827586	157.333	76	1.03	7.02	1.93	15.797	603.463	15.03	4.64	85.3073	15.165	148.6	28.561	17.8384	98.92	105.43	9.555	130.974	74.6539	FALSE	FALSE	1	0	0	0	0	FALSE	a	0	81
YY006217	ANQ	60.8323	M	CC	current	current	18.6566	0.851852	178	100	1.32	4.79	1.3	10.574	499.674	9.61	7.19	97.6475	11.592	78.2	32.219	18.3848	93.5375	90.3975	7.775	150.207	80.8497	FALSE	FALSE	1	0	0	0	0	FALSE	a	1	81
YY006286	ANQ	68.334	M	CC	current	past	20.2645	0.804878	170	81.3333	0.92	4.18	1.69	8.728	887.044	10.99	5.31	100.962	12.178	33.8	32.2	21.5152	101.96	106.135	7.69	160.5	88.3333	FALSE	FALSE	1	1	0	0	0	FALSE	a	1	82
YY007167	ANQ	68.2793	M	CT	current	current	23.833	0.901099	148.667	94.6667	0.58	5.04	1.9	6.279	541.54	15.28	4.67	89.837	17.669	116.6	43.21	15.0862	62.8875	85.915	6.0975	148.838	86.9605	FALSE	FALSE	1	0	0	0	0	FALSE	a	0	82
YY006391	ANQ	67.8056	M	CC	current	no	20.1676	0.848837	161.333	98.6667	0.79	3.93	1.32	16.63	451.982	14.57	4.69	100.311	8.172	35.6	22.378	18.6855	80.3475	93.6	7.79	132	84	FALSE	FALSE	0	0	0	0	0	FALSE	b	1	83
YY006587	ANQ	67.833	M	TT	no	current	21.5577	0.896552	173.333	77.3333	1.11	4.16	1.45	15.559	312.531	15.67	5.27	94.6217	6.87	51.2	25.33	20.3471	118.05	84.815	6.9	144.613	76.8584	FALSE	TRUE	1	1	0	0	0	FALSE	b	0	83
YY005920	ANQ	72.9117	M	CT	current	current	21.9761	0.885057	150	88	0.9	4.66	1.56	14.484	300.524	13.41	4.64	86.5308	11.391	116.8	28.477	16.7557	75.82	88.75	6.465	136.203	80.8304	FALSE	TRUE	1	0	0	0	0	FALSE	b	0	84
YY006403	ANQ	72.627	M	CC	past	past	23.3155	0.977273	176.667	98.6667	1.77	5.32	0.82	11.576	636.234	11.27	3.8	72.9755	18.992	94.7	24.286	17.8542	102.665	94.615	6.8725	165.099	93.4809	FALSE	TRUE	1	0	1	0	0	FALSE	b	1	84
YY006484	ANQ	59.154	F	CT	no	no	25.4176	0.925532	196	94	1.25	6	1.46	14.059	520.791	10.21	11.16	154.487	11.524	72.8	22.575	15.9739	90.3825	104.195	11.7825	145.716	81.1966	FALSE	TRUE	1	0	0	0	0	FALSE	a	1	86
YY006582	ANQ	59.1622	F	CT	no	no	20.9711	0.847059	158.667	88.6667	1.24	4.34	1.18	10.602	342.231	11.37	5.43	94.8794	6.322	64.9	18.101	16.4705	87.1975	95.71	6.4825	137.892	79.6646	FALSE	TRUE	1	0	0	0	0	FALSE	a	0	86
YY006488	ANQ	54.9268	F	CT	no	no	26.1801	0.955056	208.667	108.667	1.18	4.23	1.2	13.617	440.786	9.1	5.22	97.5886	6.475	39.5	11.911	18.0711	108.505	100.81	6.61	137.358	89.2079	FALSE	FALSE	1	0	0	0	0	FALSE	b	1	87
YY007047	ANQ	54.9678	F	CT	no	no	28.6726	0.941748	183.333	118.667	2.02	4.27	1.02	9.966	603.061	13.11	4.63	88.976	7.958	76.3	28.66	19.7891	160.907	118.24	9.4725	157.06	96.3352	FALSE	FALSE	1	0	0	0	0	FALSE	b	0	87
YY006400	ANQ	64.0548	M	TT	current	current	24.8552	0.879121	192.667	105.333	0.78	2.34	1.52	20.511	338.334	6.9	2.53	122.237	15.122	129.8	28.282	17.6871	85.9175	90.0875	8.815	144.198	85.6642	FALSE	TRUE	1	1	0	0	0	FALSE	b	0	88
YY006506	ANQ	64.0602	M	CC	past	current	26.3032	0.967742	164	92.6667	1.85	3.88	0.89	9.618	318.338	33.75	6.94	96.9216	7.188	32.4	23.662	18.3737	103.55	88.7425	5.315	145	85.6667	FALSE	FALSE	0	0	0	0	0	FALSE	b	1	88
YY006244	ANQ	65.5359	F	CC	no	no	19.4374	0.840909	168.667	89.3333	1.18	5.57	1.97	21.244	866.939	8.89	17.45	96.7907	18.902	83	15.306	14.9276	92.1825	84.485	8.735	133.622	73.9098	FALSE	FALSE	1	0	1	0	0	FALSE	a	0	89
YY006661	ANQ	65.5469	F	CT	no	no	22.2963	0.836957	172.667	76.6667	0.93	5.66	1.96	9.622	485.184	10.99	4.29	73.7101	7.13	58.7	26.501	21.0313	132.34	97.44	8.9225	151.001	75.8513	FALSE	FALSE	1	1	0	0	0	FALSE	a	1	89
YY005669	ANQ	55.8412	F	CC	no	no	20.6131	0.804598	170.667	90.6667	1.86	5.7	1.3	12.081	481.462	11.74	4.48	84.4422	13.766	86.9	32.261	19.4324	98.085	92.7075	8.4925	136.479	80.9101	FALSE	FALSE	1	0	0	0	0	FALSE	a	0	90
YY006668	ANQ	55.8576	F	CT	no	no	21.0082	0.880952	180	92	0.84	3.85	1.17	15.538	521.526	10.55	5.23	98.7159	7.366	45.8	18.477	18.4642	100.108	112.29	8.1775	173	91	FALSE	TRUE	0	0	0	0	0	FALSE	a	1	90
YY006228	ANQ	70.2423	F	CT	no	no	18.3256	0.790123	188.667	82.6667	1.23	4.15	1.43	11.551	610.505	13	5.49	78.9225	9.502	41.1	23.849	17.8878	96.44	83.47	6.41	137.227	71.6182	FALSE	FALSE	1	1	0	0	0	FALSE	b	0	91
YY006670	ANQ	70.2122	F	CC	no	no	25.7778	0.945652	160.667	85.3333	1.51	3.94	1.3	6.873	391.283	15.73	6.67	71.5693	8.183	44.1	16.118	21.9295	124.625	93.455	9.5425	160	96	FALSE	TRUE	1	0	0	0	0	FALSE	b	1	91
YY006895	ANQ	60.5941	F	TT	no	no	29.9831	1.08247	156.667	83.3333	1.49	5.09	1.3	11.202	522.893	10.6	5.02	104.691	11.919	52.5	21.509	16.1584	106.18	97.425	9.4725	136	78	FALSE	TRUE	0	0	0	0	0	FALSE	a	1	92
YY007482	ANQ	60.6516	F	CT	no	no	21.8131	0.791209	149.333	67.3333	1	3.41	0.92	8.464	522.458	13.2	4.76	105.119	6.947	55.4	29.692	17.8598	94.83	90.055	8.7275	145.034	68.4621	FALSE	FALSE	1	0	0	0	0	FALSE	a	0	92
YY005373	ANQ	71.7837	M	CT	current	current	25.1233	0.989899	148.667	103.333	1.03	4.18	1.26	8.782	370.849	17.52	4.84	83.3816	21.258	93.2	31.42	20.5773	88.575	83.195	12.1975	129.485	71.9811	FALSE	TRUE	1	0	0	0	0	FALSE	b	0	93
YY006968	ANQ	71.7782	M	CC	current	current	19.35	0.885057	176.667	70.6667	0.68	3.36	1.62	13.329	542.676	10.47	4.11	69.7417	12.041	75.3	21.067	16.6618	105.13	80.555	8.37	144.873	67.1941	FALSE	TRUE	1	0	0	0	0	FALSE	b	1	93
YY006731	ANQ	72.3012	M	CT	current	current	20.5191	0.875	190	114.667	1.12	5.1	1.73	9.938	515.689	10.87	4.81	86.7605	12.386	59.7	27.071	17.7516	98.1725	82.855	9.7525	135.382	82.2533	FALSE	FALSE	1	1	0	0	0	FALSE	b	0	94
YY007124	ANQ	72.4216	M	CT	current	current	23.9158	0.913978	158.667	100	1.68	8.63	1.14	10.136	683.765	14.88	4.72	82.1497	12.776	66.7	17.494	18.8012	100.442	99.2425	10.2375	142.035	80.9157	FALSE	TRUE	1	1	0	0	0	FALSE	b	1	94
YY007145	ANQ	67.8631	M	CT	past	current	26.0375	0.905263	161.333	103.333	1.22	6.38	2.74	15.754	549.234	21.29	5.99	47.535	12.466	66.1	39.256	17.8136	98.1325	114.64	8.8775	159.833	101.797	FALSE	FALSE	1	0	0	0	0	FALSE	b	1	95
YY007224	ANQ	67.9097	M	CC	current	no	22.8164	0.926316	166.667	102.667	1.03	6.15	1.45	9.221	437.992	14.59	4.28	91.8772	13.138	53.3	18.5	17.1734	95.905	99.04	8.2775	129.667	77.9259	FALSE	TRUE	1	1	0	0	0	FALSE	b	0	95
YY006786	ANQ	72.9555	F	CT	no	no	22.4444	0.933333	159.333	97.3333	1.3	5.45	1.52	16.816	398.701	11.16	5.64	89.4427	12.524	51.9	27.659	15.8723	110.743	78.8825	7.53	163.184	85.6864	FALSE	FALSE	1	1	0	0	0	FALSE	a	0	96
YY007154	ANQ	72.8597	F	CC	no	no	21.9479	1.0375	180.667	92.6667	2.14	5.42	1.6	10.717	524.109	10.34	4.79	86.5939	8.688	78.9	22.45	16.2459	118.638	203.732	8.035	160.667	79.6667	FALSE	TRUE	0	0	0	0	0	FALSE	a	1	96
YY006184	ANQ	71.6797	F	CC	no	no	21.9289	0.965116	156.667	84.6667	1.31	4.54	0.94	9.547	335.31	12.77	4.42	87.7932	9.383	64.2	26.925	17.7291	76.1	83.2675	6.9525	147.563	81.1212	FALSE	FALSE	1	0	0	0	0	FALSE	a	0	97
YY007244	ANQ	71.7974	F	CC	no	no	29.3971	0.941748	210	78	1.88	6.5	1.54	9.01	502.2	16.8	6.17	88.9639	13.865	80.1	20.02	18.1061	99.6075	90.8725	8.5325	161.248	72.404	FALSE	FALSE	1	0	0	0	0	FALSE	a	1	97
YY005672	ANQ	47.9151	F	CT	no	no	26.491	0.914894	158.667	94.6667	3.85	7.13	1.22	9.324	551.633	10.59	4.49	116.835	13.262	71.1	26.909	17.2138	104.3	102.463	7.85	131.713	85.8151	FALSE	FALSE	0	0	0	0	0	FALSE	b	0	98
YY007444	ANQ	47.9644	F	CC	no	no	29.2421	0.864078	195.333	105.333	1.47	4.36	1.1	15.143	513.627	10.04	4.06	102.809	7.79	74.2	23.271	18.9053	79.3025	87.0875	8.495	154.896	97.1209	FALSE	TRUE	1	0	0	0	0	FALSE	b	1	98
YY005548	ANQ	66.0342	M	CT	no	no	21.1827	0.931818	173.333	102.667	0.68	3.22	1.2	13.708	379.254	13.67	4.52	94.1438	8.71	70.8	21.652	18.2626	91.5625	75.6625	6.7325	123.848	79.9166	FALSE	TRUE	1	0	0	0	0	FALSE	b	0	99
YY007449	ANQ	66.078	M	TT	no	no	27.8867	0.990196	156	86	1.98	4.62	0.65	4.894	505.233	19.14	5.28	93.0129	9.878	56.1	21.087	19.8155	88.875	108.08	7.5725	126.688	66.2457	FALSE	TRUE	1	0	0	0	0	FALSE	b	1	99
YY006841	ANQ	73.1225	M	TT	no	past	27.3743	0.988889	160.667	88	1.22	5.11	1.32	7.665	414.506	29.98	4.09	91.4562	13.06	49.7	18.472	16.2028	100.677	122.392	8.11	122.676	81.7137	FALSE	FALSE	1	0	0	0	0	FALSE	b	0	100
YY007466	ANQ	73.128	M	CC	current	current	19.2708	0.843373	208.667	108.667	1.25	4.65	1.22	17.354	549.394	12.95	5.05	76.8279	9.176	87.6	26.513	15.9757	82.6125	86.135	6.2525	160.71	84.683	FALSE	TRUE	1	1	0	0	0	FALSE	b	1	100
YY007475	ANQ	69.2485	F	CT	no	no	21.4919	0.770115	162	94.6667	1.17	4.01	1.14	8.602	397.429	11.97	5.4	91.8575	7.591	44.5	15.907	18.6166	88.61	69.3025	6.74	142.931	83.4186	FALSE	TRUE	1	1	0	0	0	FALSE	b	1	101
YY007621	ANQ	69.2293	F	CC	no	no	23.4339	0.901099	176.667	90.6667	1.12	5.49	1.29	10.585	428.35	11.88	4.85	93.0005	12.086	52.6	30.273	16.5242	102.635	96.225	9.975	151.376	75.2801	FALSE	TRUE	1	1	0	0	0	FALSE	b	0	101
YY007341	ANQ	57.0678	F	CC	no	no	20.9321	0.843373	161.333	105.333	0.83	4.32	1.7	6.214	598.828	18.93	5.5	79.0141	11.421	53	22.083	19.9096	80.8875	80.7125	7.8825	145.181	97.1739	FALSE	TRUE	1	1	0	0	0	FALSE	b	0	102
YY007527	ANQ	57.0541	F	CT	no	no	18.5178	0.91954	197.333	109.333	1.46	4.02	1.4	10.121	682.458	12.16	4.21	103.341	8.342	50.1	35.787	17.5125	113.343	73.7875	6.405	169.2	90.6129	FALSE	FALSE	1	1	0	1	1	FALSE	b	1	102
YY007733	ANQ	62.5407	F	TT	no	no	20.2515	0.921348	206.667	98	1.14	4.94	1.26	10.382	309.064	10.26	4.53	99.5662	9.321	52.4	21.421	17.6806	127.558	107.767	8.04	139.667	74.3333	FALSE	FALSE	1	0	0	0	0	FALSE	a	1	103
YY008255	ANQ	62.5489	F	CT	no	no	23.4952	0.789474	219.333	111.333	1.38	5.39	1.24	13.489	441.774	14.96	5.76	70.6012	12.107	100.5	22.216	16.8098	77.905	119.86	5.875	182.016	97.7816	FALSE	TRUE	1	1	0	0	0	FALSE	a	0	103
YY007767	ANQ	74.9897	M	CT	past	past	25.3046	0.968421	186	99.3333	1.3	4.63	1.41	4.451	462.964	23.06	4.8	62.4343	9.064	58.2	17.994	17.0396	96.1075	107.71	7.575	134.335	73.741	FALSE	TRUE	1	0	0	0	0	FALSE	b	1	104
YY008338	ANQ	74.5873	M	CT	current	past	22.0304	0.822222	207.333	102.667	0.96	4.59	1.13	6.183	464.887	19.04	4.88	94.4996	6.752	45.7	33.62	23.6113	111.55	181.553	14.1	137.761	80.0719	FALSE	FALSE	1	0	0	0	0	FALSE	b	0	104
YY007923	ANQ	71.4387	F	CT	no	no	20.7756	0.880435	199.333	96.6667	1.48	5	1.18	7.224	387.336	17.38	4.91	88.2346	10.203	52.9	31.571	19.8588	65.0375	172.465	7.5325	148.944	74.861	FALSE	FALSE	1	1	0	0	0	FALSE	b	1	105
YY008706	ANQ	71.3895	F	CC	no	no	29.9054	0.897196	165.333	95.3333	2.87	3.72	1.03	13.523	349.663	8.75	4.81	100.526	15.613	97.2	26.362	18.5377	97.9975	166.835	8.2675	152.1	86.0661	FALSE	FALSE	1	0	0	0	0	FALSE	b	0	105
YY008032	ANQ	60.8214	M	CT	past	current	24.5243	0.904255	196	106	0.95	5.5	1.42	6.792	589.652	21.29	4.54	93.6397	9.763	75.4	18.591	14.962	106.575	120.28	10.2575	142.519	86.9065	FALSE	FALSE	1	1	0	0	0	FALSE	a	1	106
YY008457	ANQ	60.8296	M	CT	past	no	25.9107	0.895833	160.667	89.3333	1.47	3.86	0.96	7	559.789	13.01	5.19	93.2831	9.651	68.3	22.135	17.0725	79.77	143.84	7.3175	145.517	79.5282	FALSE	FALSE	1	0	0	0	0	FALSE	a	0	106
YY008142	ANQ	69.64	M	CC	no	no	24.864	0.865169	162	66.6667	0.69	4.39	1.48	5.887	432.584	11.6	5.62	103.228	7.818	31.3	25.454	15.4016	58.1725	106.907	6.03	160.333	74.6667	FALSE	TRUE	1	0	0	0	0	FALSE	b	1	107
YY008400	ANQ	69.5962	M	CT	no	no	21.5382	0.818182	147.333	99.3333	1.28	4.61	1.5	16.362	592.089	17.02	4.61	72.4007	9.616	55.7	41.518	20.5542	101.575	122.555	9.07	146.208	76.1632	FALSE	FALSE	1	0	0	0	0	FALSE	b	0	107
YY008361	ANQ	63.2416	M	TT	no	current	27.6495	0.967742	156.667	98.6667	0.88	5.82	2.31	5.1	604.693	16.13	4.62	94.5018	10.21	113.8	33.971	20.2682	114.948	127.585	7.5325	151.473	80.5469	FALSE	TRUE	1	1	0	0	0	FALSE	a	1	108
YY008561	ANQ	63.2526	M	CC	no	no	22.9591	0.853933	188	96	0.78	3.98	1.58	22.524	627.448	12.28	4.71	84.723	10.568	61.9	31.649	16.8767	79.355	127.543	9.775	140.485	84.3721	FALSE	FALSE	1	0	0	0	0	FALSE	a	0	108
YY008365	ANQ	62.872	F	TT	no	no	19.9166	0.756098	146.667	82.6667	0.83	4.82	1.75	9.768	456.202	11.53	5.86	96.5314	11.223	36.7	39.885	18.8774	93.99	97.56	8.0575	165.947	87.6667	FALSE	TRUE	1	1	0	0	0	FALSE	a	1	109
YY008531	ANQ	62.9021	F	CT	no	no	22.9095	0.755556	192.667	112	0.96	5.03	1.54	11.534	487.802	12.91	4.77	88.1242	12.08	56.8	24.338	25.833	145.03	153.93	22.1425	150.549	91.3527	FALSE	TRUE	1	0	0	0	0	FALSE	a	0	109
YY008402	ANQ	70.7242	M	CC	current	no	21.4887	0.836957	194	99.3333	0.94	3.57	1.07	10.451	576.433	10.06	5.55	93.9618	9.608	78.1	23.22	19.6495	94.97	112.168	9.1375	144.757	78.385	FALSE	TRUE	1	0	0	0	0	FALSE	a	1	110
YY008753	ANQ	70.5435	M	CC	no	no	24.0962	0.827957	160	88	0.82	5.49	1.7	10.189	518.937	22.04	7.18	61.0383	8.5	73.5	17.954	16.1492	97.195	115.45	8.495	135.687	66.1404	FALSE	FALSE	1	0	0	0	0	FALSE	a	0	110
YY007795	ANQ	72.8131	M	CT	past	current	20.8889	0.885057	159.333	93.3333	1.01	4.86	1.52	4.834	401.815	15.52	4.87	83.6541	8.718	82.3	34.121	17.9683	109.677	118.912	9.7475	129.475	78.56	FALSE	FALSE	1	0	0	0	0	FALSE	a	0	111
YY008425	ANQ	72.4654	M	CT	past	past	16.8446	0.758621	180.667	94	1.18	4.38	1.1	12.361	337.564	17.25	5.52	84.6225	9.656	40.2	26.524	18.7272	86.8625	96.1825	6.335	147.968	82.0567	FALSE	FALSE	1	0	0	0	0	FALSE	a	1	111
YY008192	ANQ	65.9302	F	TT	past	past	22.1615	0.933333	200	103.333	1.65	5.62	1.09	14.002	485.69	8.62	4.66	92.3894	14.622	72	19.501	18.9195	105.585	140.882	8.3625	133.679	79.6726	FALSE	TRUE	1	0	0	0	0	FALSE	b	0	112
YY008458	ANQ	66.1355	F	TT	no	no	34.6021	1	160	86.6667	1.32	5.38	1.14	10.812	596.763	14.34	7.97	85.3422	9.419	56.8	22.483	18.9425	118.985	128.775	9.9125	149.46	75.1708	TRUE	TRUE	1	0	1	1	1	TRUE	b	1	112
YY008544	ANQ	62.9733	F	CT	no	no	20.5572	0.781609	198.667	97.3333	0.74	5.19	1.57	14.467	480.356	15.57	5.36	96.1707	10.881	30.3	15.246	19.5374	102.465	119.222	6.74	138.109	74.0123	FALSE	FALSE	1	1	0	0	0	FALSE	b	0	113
YY008610	ANQ	62.9706	F	CT	current	no	23.4739	0.817204	196.667	106.667	2.07	5.16	1.12	9.521	422.719	10.56	5.54	101.401	11.502	65.7	17.416	19.2203	81.245	214.495	8.6375	128.217	73.6413	FALSE	FALSE	1	0	0	0	0	FALSE	b	1	113
YY007707	ANQ	60.345	F	CC	no	current	23.0332	0.822917	150	85.3333	0.98	5.46	1.84	11.177	610.642	9.53	7.85	99.8047	12.759	69.8	27.933	15.148	113.46	89.6675	10.19	123.586	74.0201	FALSE	FALSE	1	0	0	0	0	FALSE	a	0	114
YY008699	ANQ	60.3395	F	TT	no	no	24.5603	0.88172	176.667	87.3333	1.81	6.21	1.3	22.32	319.842	11.15	5.23	100.324	10.714	72.6	22.542	19.0065	85.435	114.237	5.76	139.231	76.3418	FALSE	FALSE	1	0	0	0	0	FALSE	a	1	114
YY007761	ANQ	72.4134	M	CC	current	current	27.3096	0.948454	188.667	109.333	1.29	3.9	1.24	5.261	586.017	13.84	4.41	89.7507	8.566	61	28.231	20.0128	79.3075	109.33	7.565	137.133	83.2897	FALSE	TRUE	1	1	0	0	0	FALSE	b	0	115
YY008705	ANQ	72.46	M	CT	no	no	22.0386	0.797753	188.667	102	2.02	4.73	1.13	9.404	570.697	16.06	7.17	63.4778	11.962	78.5	32.567	19.4442	93.4975	138.605	9.4075	115.009	85.6268	FALSE	FALSE	1	0	0	0	0	FALSE	b	1	115
YY009012	LYG	63.8275	M	TT	current	no	23.2917	0.826087	186.667	93.3333	1.26	5.71	1.14	6.265	272.854	17.38	4.84	95.7289	9.434	82.4	25.33	15.1721	68.825	135.553	6.16	164.271	93.3868	FALSE	TRUE	1	1	0	0	0	FALSE	b	1	116
YY009593	LYG	63.8029	M	TT	past	no	25.2595	0.896907	180	90.6667	1.21	8	1.17	11.828	614.709	16.42	6.73	89.6597	13.366	89.4	37.815	16.852	86.1325	130.833	8.6775	142.709	77.5444	FALSE	TRUE	1	1	0	0	0	FALSE	b	0	116
YY009026	LYG	60.7556	F	CC	no	no	28.5989	0.960784	161.333	87.3333	1.32	5.85	1.38	11.624	337.441	13.68	6.19	101.709	12.156	81.5	18.673	16.7455	94.27	150.545	6.8375	149.003	88.5759	FALSE	TRUE	1	1	0	0	0	FALSE	a	1	117
YY009136	LYG	60.5366	F	CT	no	no	25.5676	0.816327	139.333	84.6667	4.58	6.49	1.21	11.627	297.954	7.72	5.28	100.447	11.848	47.9	20.532	17.9205	113.627	153.012	9.965	131.346	76.1504	FALSE	TRUE	0	0	0	0	0	FALSE	a	0	117
YY009029	LYG	56.5065	F	TT	no	no	22.5184	0.875	207.333	98.6667	1.24	6	1.54	6.929	378.729	10.15	4.82	112.07	11.129	109.9	18.584	17.4585	57.1025	146.405	8.0475	150.359	83.6445	FALSE	TRUE	1	1	0	0	0	FALSE	a	1	118
YY009149	LYG	56.4901	F	CT	current	no	26.6728	0.880734	180	90	0.88	4.8	1.63	9.618	342.643	8.33	8.98	100.41	12.587	99.3	20.836	16.0896	84.885	151.018	8.515	149.239	85.2	FALSE	FALSE	1	1	1	0	0	FALSE	a	0	118
YY009044	LYG	74.6475	F	CT	no	no	25.3031	0.969388	173.333	115.333	1.08	4.95	0.96	5.09	304.05	24.53	6.95	79.0594	12.091	69.8	14.27	20.3438	93.3925	141.965	6.485	155.131	88.5891	FALSE	TRUE	1	1	0	0	0	FALSE	a	1	119
YY009858	LYG	74.5681	F	CC	no	no	25.4375	0.89	162.667	94	2.25	6.62	0.91	9.822	527.558	13.61	5.41	87.8599	14.29	108.7	14.637	21.9984	148.17	118.67	7.87	152.856	82.1649	FALSE	TRUE	1	1	0	0	0	FALSE	a	0	119
YY009108	LYG	45.0678	M	CT	current	no	23.5636	0.870968	171.333	118.667	1.06	6.92	1.22	7.637	458.694	17.57	5.29	76.3072	10.145	95.4	26.412	NA	NA	NA	NA	145.668	100.642	FALSE	FALSE	1	1	0	0	0	FALSE	a	0	120
YY009118	LYG	45.0103	M	CC	current	current	23.3067	0.816327	184.667	125.333	1.02	7.47	1.6	7.117	450.481	26.24	6.1	107.724	6.455	100	22.185	16.1786	92.5325	150.98	6.61	186.136	120.728	FALSE	TRUE	1	1	0	0	0	FALSE	a	1	120
YY009144	LYG	53.0951	M	TT	current	current	23.1739	0.854167	242	120.667	1.01	6.09	1.69	5.302	372.981	14.42	4.85	101.425	3.075	76.8	14.974	21.3489	110.67	141.572	7.2625	152.863	98.8756	FALSE	FALSE	1	1	0	0	0	FALSE	a	1	121
YY009607	LYG	53.2895	M	CC	past	current	27.5482	0.959184	171.333	100.667	1.34	4.81	1.18	4.518	321.734	13.91	5.21	106.896	18.353	122.1	18.793	18.8127	73.42	125.228	8.7825	145.196	91.1339	FALSE	FALSE	1	1	0	0	0	FALSE	a	0	121
YY009152	LYG	65.7823	F	CT	no	no	26.1993	0.909091	210.667	112.667	2.05	7.5	1.31	9.446	794.118	15.45	5.13	93.5081	12.713	98.1	30.946	19.89	116.153	153.825	8.73	150.333	90.3333	FALSE	TRUE	1	0	0	0	0	FALSE	a	1	122
YY009513	LYG	65.7604	F	CT	no	no	26.1494	0.932584	184	90	2.01	7.24	1.33	8.067	561.734	10.26	16.01	103.564	15.935	81.7	19.403	17.4241	111.86	109.828	10.8225	145.151	78.3909	FALSE	FALSE	1	0	0	0	0	FALSE	a	0	122
YY009174	LYG	73.6756	F	CT	NA	NA	21.7556	NA	268.667	124.667	0.95	4.97	1.73	30.72	1273.3	12.56	4.93	74.3696	19.644	108.5	34.857	19.5289	130.49	148.613	7.3475	175.248	97.0178	FALSE	FALSE	1	1	0	0	0	FALSE	b	1	123
YY009642	LYG	73.7933	F	CC	no	no	24.9896	0.917526	163.333	83.3333	2.2	6.75	1.44	11.312	364.31	18.21	9.7	89.9542	11.997	58.2	16.239	15.2091	107.44	97.25	7.09	137.747	71.9489	FALSE	TRUE	1	0	0	0	0	FALSE	b	0	123
YY009173	LYG	57.2841	M	CT	past	past	19.9599	0.882353	154	85.3333	1.31	7.07	2.64	9.476	596.473	10.82	6.67	97.0508	20.181	89	24.152	21.9492	149.31	167.018	12.8075	132.795	81.5527	FALSE	TRUE	1	0	0	0	0	FALSE	b	0	124
YY009193	LYG	57.3607	M	TT	current	past	24.5682	0.85567	131.333	83.3333	1.4	5.78	1.26	7	316.591	11.22	5.48	105.92	10.712	83.5	29.422	NA	NA	NA	NA	139.286	80.7507	FALSE	TRUE	1	1	0	0	0	FALSE	b	1	124
YY009256	LYG	69.0678	M	TT	no	current	24.8199	0.968421	206	91.3333	3.61	8.1	1.61	7.781	632.794	12.96	16.9	105.338	15.993	38.3	27.017	15.2782	58.355	136.17	10.905	165.222	65	FALSE	TRUE	1	1	1	0	0	FALSE	a	1	125
YY009450	LYG	69.0705	M	TT	current	current	24.3965	1.02222	178	100	2.22	7.38	1.25	7.749	891.73	13.96	5.36	79.0492	16.102	110.5	34.272	19.6292	52.17	145.26	8.6	138.4	81.971	FALSE	FALSE	1	0	0	0	0	FALSE	a	0	125
YY009287	LYG	67.6742	F	CT	no	no	24.2234	0.88172	210.667	79.3333	2.05	5.65	0.88	11.375	346.46	16.37	9.36	77.5718	12.362	58.5	22.073	21.2884	108.317	143.14	6.7525	164.656	75.6963	FALSE	TRUE	1	1	0	0	0	FALSE	a	1	126
YY009586	LYG	67.614	F	CT	current	no	28.6726	0.875	145.333	69.3333	1.61	5.81	1.18	5.692	364.738	11.34	7.35	97.8698	12.156	58.5	14.493	19.0259	95.8175	89.925	8	133.49	67.2807	FALSE	FALSE	0	0	0	0	0	FALSE	a	0	126
YY009342	LYG	59.0992	F	CT	no	no	29.4241	0.941176	178.667	102.667	1.32	6.98	1.6	9.887	519.734	13.91	7.09	94.7698	10.851	101.2	28.686	18.4993	100.243	157.45	7.2625	170	86	FALSE	TRUE	1	0	0	0	0	FALSE	b	1	127
YY009598	LYG	59.0527	F	CC	no	no	24.8777	0.752688	156.333	90	0.9	6.54	1.97	12.789	286.784	10.99	5.74	101.169	15.409	61.4	21.686	19.5725	93.2125	113.97	8.1675	127.662	79.219	FALSE	FALSE	1	0	0	0	0	FALSE	b	0	127
YY009346	LYG	73.8371	F	CC	no	no	22.151	0.842105	198.667	100	1.55	9.22	1.43	12.893	491.674	12.13	5.85	77.37	10.876	75	15.927	17.605	85.28	133.502	5.9375	157.272	87.3248	FALSE	TRUE	1	1	0	0	0	FALSE	a	1	128
YY009405	LYG	74.2916	F	CT	past	no	25.386	0.915789	160.667	66.6667	13.88	5.8	0.69	5.711	275.601	11.92	10.4	86.1971	13.897	88.5	12.683	17.8974	91.3875	240.055	5.2025	155.947	71.6937	FALSE	TRUE	1	0	0	0	0	FALSE	a	0	128
YY009373	LYG	51.9726	M	CT	current	current	23.3387	0.806452	169.333	106.667	0.87	4.54	1.43	8.706	359.513	14.58	4.79	89.7678	13.802	79.4	26.143	18.0115	65.0825	187.89	7.9525	140.667	88.6667	FALSE	FALSE	1	1	0	0	0	FALSE	a	1	129
YY009387	LYG	51.9617	M	CT	no	current	24.1672	0.944444	147.333	99.3333	0.63	6.78	1.27	8.868	643.299	13.34	8.48	87.2998	17.622	88.3	17.997	20.3517	112.375	185.895	9.51	130.73	85.9605	FALSE	FALSE	1	1	0	0	0	FALSE	a	0	129
YY009378	LYG	57.3525	M	CT	current	current	25.5351	0.989362	180.667	111.333	1.25	5.31	1.52	4.435	384.185	13.36	6.6	91.5936	20.352	87.4	25.595	18.5071	94.865	149.73	8.6075	152.667	90	FALSE	FALSE	1	0	0	0	0	FALSE	a	1	130
YY009418	LYG	57.2567	M	CT	current	current	23.379	0.888889	168.667	88.6667	0.86	5.43	1.16	3.358	386.34	15.33	5.22	94.9473	12.846	119.1	29.107	20.2841	90.29	178.083	5.3075	138.534	85.4542	FALSE	FALSE	1	1	0	0	0	FALSE	a	0	130
YY009233	LYG	72.4134	F	CT	no	no	23.8088	0.808511	166	75.3333	0.71	5.03	1.39	4.934	291.077	9.45	4.76	91.8098	12.067	67.3	26.517	21.53	98.5575	148.31	8.255	130.364	77.7955	FALSE	FALSE	0	0	0	0	0	FALSE	a	0	131
YY009413	LYG	72.2491	F	CT	past	no	25.2393	0.923913	167.333	93.3333	0.9	7.06	1.34	6.474	474.303	17.28	5.47	66.4694	15.167	83.3	26.577	20.8639	109.168	130.27	5.9125	157.107	95.2658	FALSE	FALSE	0	1	0	0	0	FALSE	a	1	131
YY009429	LYG	70.2587	M	CT	no	current	25.6373	0.873684	170.667	85.3333	NA	5.04	1.17	6.243	388.143	16.41	4.76	76.8765	19.018	84.7	26.202	20.8346	95.935	220.34	6.5	147.464	84.2891	FALSE	TRUE	1	0	0	0	0	FALSE	a	1	132
YY009891	LYG	70.3436	M	CT	current	past	23.7541	0.864583	167.333	80	0.86	4.55	1.25	4.292	298.726	18.24	4.56	90.2672	12.869	46.2	26.948	17.5654	92.5675	85.2575	8.3375	139.744	78.2722	FALSE	TRUE	1	1	0	0	0	FALSE	a	0	132
YY009366	LYG	49.9329	F	CT	no	no	25.0727	0.873563	154.667	95.3333	1.48	5.32	1.67	6.742	458.448	10.98	4.97	100.289	13.99	91.4	23.651	17.6524	88.135	161.907	8.2775	135.009	84.9605	FALSE	FALSE	0	0	0	0	0	FALSE	a	0	133
YY009447	LYG	49.8426	F	CT	no	past	31.4055	0.940594	199.333	116.667	1.26	6.58	1.36	9.688	340.514	12.63	5.44	79.8029	10.362	68.2	27.893	16.41	91.3725	159.042	6.93	160.704	90.564	FALSE	FALSE	1	1	0	0	0	FALSE	a	1	133
YY009501	LYG	62.8802	F	CT	current	no	29.7444	0.873786	149.333	76.6667	2.22	8.83	1.28	11.273	505.984	13.46	18.7	104.277	14.062	85.4	19.685	17.3142	97.38	143.36	8.975	136.664	73.1737	FALSE	FALSE	1	1	1	0	0	FALSE	b	1	134
YY009751	LYG	62.9103	F	CT	no	no	22.2898	0.845238	187.333	108	1.01	7.79	1.49	9.89	692.234	11.16	6.9	95.6394	19.84	50.1	18.014	18.804	125.998	110.405	7.7475	138.585	85.8904	FALSE	TRUE	1	1	0	0	0	FALSE	b	0	134
YY009408	LYG	67.0554	M	CC	current	current	23.6461	0.893617	165.333	104	1.73	5.82	1.36	5.938	305.722	20.63	5.04	91.7929	16.551	101	23.42	17.9448	105.31	195.875	7.3625	133.406	81.1274	FALSE	FALSE	1	1	0	0	0	FALSE	b	0	135
YY009509	LYG	67.0007	M	CT	current	no	28.3554	0.959184	192	109.333	1.97	4.57	1.38	8.876	348.16	13.42	10.89	93.7875	15.764	69.3	26.989	16.3552	59.9325	96.125	6.575	151	80.6667	FALSE	FALSE	1	1	0	0	0	FALSE	b	1	135
YY009244	LYG	59.0472	F	CT	no	no	26.0584	0.875	160	81.3333	1.26	6.99	1.48	16.32	533.742	10.31	6.44	95.0068	24.111	116.8	17.173	20.149	106.228	145.135	7.335	137.766	79.9683	FALSE	TRUE	1	0	0	0	0	FALSE	a	0	136
YY009523	LYG	59.05	F	CT	no	no	20.1305	0.747126	165.333	76	1.45	8.13	1.38	11.3	811.358	10.95	7	83.5783	14.403	106	21.927	16.7907	101.558	118.123	8.615	120.773	74.5872	FALSE	TRUE	1	0	0	0	0	FALSE	a	1	136
YY009463	LYG	62.2834	M	TT	past	current	18.7783	0.875	172.667	92	0.95	5.72	1.77	8.51	325.183	11.95	7.72	110.297	10.046	105.8	28.262	17.3386	86.145	209.963	7.9625	151.487	79.0726	FALSE	FALSE	1	1	0	0	0	FALSE	a	0	137
YY009541	LYG	62.3491	M	CT	current	current	25.7785	0.858586	148	90.6667	1.49	6.13	1.07	4.555	386.791	25.1	5.98	101.924	10.84	77.9	21.388	16.3647	88.9825	103.373	7.9825	133.516	85.0671	FALSE	FALSE	0	0	0	0	0	FALSE	a	1	137
YY009564	LYG	54.4449	F	CT	no	no	30.3302	0.932039	159.333	101.333	0.78	5.81	0.19	10.536	480.028	7.74	8.62	101.022	14.789	88.1	27.517	16.0508	96.255	161.835	7.0675	140.64	92.7264	FALSE	FALSE	0	0	0	0	0	FALSE	b	1	138
YY009701	LYG	54.4832	F	CT	no	no	22.2137	0.842697	175.333	76	1	6.74	2.14	15.074	394.22	13.31	6.94	87.8465	16.368	70.3	23.23	19.0413	54.335	111.91	7.3375	146.138	80.8055	FALSE	TRUE	1	1	0	0	0	FALSE	b	0	138
YY009016	LYG	67.9206	M	TT	no	no	17.9987	0.833333	160	90	0.83	4.69	1.84	11.126	339.964	22.1	4.42	65.0673	8.427	71.1	28.946	18.7899	107.472	133.85	6.5575	126.312	72.8443	FALSE	TRUE	1	1	0	0	0	FALSE	a	0	139
YY009565	LYG	67.8741	M	CT	no	no	27.7551	0.972222	181.333	102	1.22	5.44	1.02	14.11	264.677	21.89	6.96	77.1073	10.339	41.9	27.155	18.892	82.26	143.45	5.8675	145.246	89.7337	FALSE	TRUE	1	1	0	0	0	FALSE	a	1	139
YY009069	LYG	61.7084	M	CC	current	current	21.0871	0.869565	188	87.3333	1.28	6.85	1.9	5.089	371.52	27.95	4.83	95.9679	15.804	91.4	37.142	15.9271	86.1775	193.595	6.79	156.707	85.9398	FALSE	FALSE	1	1	0	0	0	FALSE	a	0	140
YY009583	LYG	61.7112	M	CT	current	current	29.4108	0.914286	162	99.3333	0.3	6.11	0.2	8.956	422.237	13.65	8.01	98.8412	18.249	90.2	21.604	20.3203	73.4475	107.75	7.11	160	99.3333	FALSE	FALSE	1	0	1	0	0	FALSE	a	1	140
YY009071	LYG	65.7851	M	CC	no	current	24.5089	0.940594	180.667	71.3333	1.48	4.32	0.81	14.067	369.546	15.17	4.91	86.4538	9.506	57.8	31.272	18.259	82.56	129.21	5.57	149.683	68.425	FALSE	FALSE	1	1	0	0	0	FALSE	b	0	141
YY009652	LYG	65.8261	M	TT	current	past	22.2034	0.857143	186	100.667	0.98	5.71	1.76	9.523	467.288	16.47	5.16	91.704	12.473	100.8	18.875	19.5753	103.853	112.547	7.2	155.214	91.791	FALSE	TRUE	1	0	0	0	0	FALSE	b	1	141
YY009655	LYG	68.1889	M	CT	current	current	28.441	0.872727	172	92.6667	3.27	7.64	1.05	6.829	357.821	15.02	5.15	91.965	11.864	76.5	23.503	20.6859	87.9675	109.1	7.445	167.297	88.9134	FALSE	TRUE	1	1	0	0	0	FALSE	b	1	142
YY009791	LYG	67.9014	M	CC	no	no	21.6433	0.91954	175.333	78	1.8	6.21	1.61	4.131	375.997	14.47	4.81	93.9926	15.281	67.5	27.677	22.0183	111.078	149.385	8.0875	129.914	70.6268	FALSE	FALSE	1	0	0	0	0	FALSE	b	0	142
YY009660	LYG	60.6543	F	CT	no	past	23.74	0.840909	189.333	88.6667	0.27	5.22	0.14	12.414	374.51	11.88	4.79	94.3458	12.113	65.9	23.756	20.0226	90.64	107.593	7.735	141.738	86.1464	FALSE	TRUE	1	1	0	0	0	FALSE	b	1	143
YY009774	LYG	60.6598	F	CT	no	no	27.4762	0.915789	160	89.3333	2.26	7.95	1.27	6.844	433.69	15.65	6.23	104.18	16.131	118.7	17.452	19.5826	112.862	112.135	6.9725	134.051	79.2595	FALSE	FALSE	0	0	0	0	0	FALSE	b	0	143
YY009258	LYG	68.2765	M	TT	current	past	24.0519	0.903226	160.667	88.6667	1.62	6.4	1.62	8.062	454.904	19.32	4.55	88.862	9.316	81.9	25.046	18.8593	84.14	166.535	8.03	143.178	85.5851	FALSE	TRUE	1	1	0	0	0	FALSE	a	0	144
YY009676	LYG	68.2519	M	TT	current	no	19.1953	0.825581	168.667	84	0.89	6.31	1.62	12.569	493.222	14.17	5.15	71.9539	17.048	60.4	32.442	21.0805	117.877	88.8225	5.715	149.639	83.1108	FALSE	FALSE	1	1	0	0	0	FALSE	a	1	144
YY009459	LYG	73.1992	F	TT	no	no	25.4877	0.923077	170	100	1.19	3.23	1.16	7.674	271.677	20.91	5.03	88.553	8.979	38	27.645	17.7753	127.218	116.005	4.7975	146.569	81.6467	FALSE	TRUE	1	1	0	0	0	FALSE	a	0	145
YY009678	LYG	73.6318	F	CC	no	no	27.2763	0.918367	170.667	82.6667	1.51	7.05	1.31	12.962	345.622	18.01	7.62	75.9756	12.585	67.5	19.69	17.7199	106.745	88.585	3.8225	153.373	80.2717	FALSE	FALSE	1	1	0	0	0	FALSE	a	1	145
YY009214	LYG	51.2197	F	TT	no	no	25.0142	0.873684	179.333	109.333	1.74	7.45	1.25	5.334	311.331	31.58	4.24	103.825	13.886	89	39.229	18.7121	81.59	154.952	7.425	139.19	88.4154	FALSE	FALSE	1	1	0	0	0	FALSE	b	0	146
YY009725	LYG	51.1978	F	CT	current	current	20.2395	0.949367	153.333	84.6667	1.17	5.53	1.43	10.048	283.726	10.97	4.69	104.088	13.693	74.3	18.702	19.6034	75.095	102.44	8.105	155.538	99.2193	FALSE	FALSE	1	1	0	0	0	FALSE	b	1	146
YY009759	LYG	49.3908	F	CC	no	no	27.1809	0.79	203.333	122	0.74	4.8	1.27	7.996	415.119	8.82	5.22	108.77	11.524	54.3	20.319	17.249	126.615	87.265	6.5975	160	94.6667	FALSE	TRUE	1	0	0	0	0	FALSE	a	1	147
YY009772	LYG	49.3333	F	CT	no	no	28.3771	0.824742	188.667	101.333	0.73	4.72	1.46	8.068	548.599	8.27	5.25	107.625	15.827	57.7	26.723	21.3847	110.385	119.47	9.6625	132.204	84.7865	FALSE	TRUE	1	0	0	0	0	FALSE	a	0	147
YY009717	LYG	67.8248	M	CC	current	current	20.8209	0.912088	202	98	0.8	5.94	2.62	10.283	385.33	19.13	6.59	97.9448	13.297	127.8	31.577	19.9426	101.895	122.705	8.285	147.145	82.3648	FALSE	FALSE	1	1	0	0	0	FALSE	a	0	148
YY009762	LYG	67.7043	M	CT	current	current	19.35	0.853659	181.333	84	1.5	10.18	2.25	13.622	344.982	17.61	5.25	72.8911	19.522	115.4	19.149	19.0504	104.062	123.632	12.345	136.072	75.0672	FALSE	FALSE	1	0	0	0	0	FALSE	a	1	148
YY009666	LYG	63.1814	M	TT	current	no	27.295	0.979381	134.667	78	2.7	5.51	1.02	4.783	332.268	18.61	4.6	111.081	8.953	84.3	13.7	19.1385	95.7175	98.49	8.2825	122.968	79.0181	FALSE	TRUE	0	0	0	0	0	FALSE	a	0	149
YY009768	LYG	63.1211	M	CT	no	no	22.4088	0.847059	182.667	110	0.65	4.25	0.85	10.812	338.453	24.28	6.34	84.8013	10.326	70.7	26.068	21.7374	96.205	112.047	6.0325	165.007	96.5111	FALSE	FALSE	1	0	0	0	0	FALSE	a	1	149
YY009311	LYG	59.896	F	CC	no	no	31.3043	0.895652	180	86	1.32	9.23	2.03	10.529	517.939	14.61	5.7	98.7515	12.013	92.7	22.918	17.6825	107.235	184.505	8.4825	146.832	80.1141	FALSE	TRUE	1	0	0	0	0	FALSE	b	0	150
YY009777	LYG	59.9069	F	TT	no	no	24.2382	0.955556	223.333	102.667	1.69	6.17	2	4.966	363.399	24.02	5.42	104.428	16.139	55.3	17.137	24.2213	144.433	148.178	8.43	191.615	96.6667	FALSE	FALSE	1	1	0	0	0	FALSE	b	1	150
YY009365	LYG	67.2936	M	TT	current	current	24.8297	0.946237	151.333	70.6667	0.62	5.04	1.5	44.605	1642.34	20.05	6.76	82.9484	15.021	99.5	16.79	22.1193	91.7375	172.455	9.2	134.737	83.001	FALSE	TRUE	1	1	0	0	0	FALSE	a	0	151
YY009788	LYG	67.1978	M	CT	current	current	22.2707	0.954023	183.333	100	0.97	6.67	1.24	4.231	394.859	16.97	5.2	73.5344	13.1	79.9	26.222	23.7566	105.395	138.26	10.295	144.185	84.5184	FALSE	TRUE	1	1	0	0	0	FALSE	a	1	151
YY009679	LYG	63.937	F	CC	no	no	24.6711	0.867347	163.333	86.6667	1.25	4.92	1.2	6.13	511.21	13.68	5.77	77.8708	10.573	85.3	18.344	20.1267	107.263	100.233	7.1475	141.048	85.5025	FALSE	TRUE	1	1	0	0	0	FALSE	b	0	152
YY009826	LYG	63.8631	F	CT	past	past	24.8777	0.954545	186.667	98	0.74	5.29	1.58	5.109	483.734	11.48	6.04	85.1246	17.109	49.7	27.487	19.622	141.74	102.817	7.54	155.19	93.039	FALSE	FALSE	1	1	0	0	0	FALSE	b	1	152
YY009385	LYG	72.4873	M	CC	no	no	21.9642	0.933333	188	95.3333	2.32	7.94	1.72	5.008	698.182	10.55	8.4	91.4641	16.041	116.3	23.793	20.1512	97.12	161.95	9.2575	148.555	78.8885	FALSE	FALSE	0	0	0	0	0	FALSE	a	0	153
YY009869	LYG	72.6297	M	TT	current	past	23.3355	0.897959	165.333	81.3333	2.98	6.32	1.02	11.43	229.267	28.82	5.54	99.5938	11.532	51.4	15.055	20.1495	97.2225	118.282	6.375	146.235	75.4673	FALSE	TRUE	1	1	0	0	0	FALSE	a	1	153
YY009339	LYG	71.8084	F	CT	no	no	30.4438	0.872727	156.667	100.667	0.55	5.85	1.84	5.046	461.132	12.38	6.32	74.7013	13.964	67.5	16.651	18.1272	96.6275	115.06	7.9125	126.168	83.6279	FALSE	TRUE	1	1	0	0	0	FALSE	a	0	154
YY009870	LYG	71.9316	F	CC	no	current	30.3593	0.888889	212.667	118.667	2.3	7.02	1.1	7.708	409.998	9.58	5.38	92.7804	8.621	55.7	15.312	23.0121	129.575	141.208	10.27	149.98	86.5119	FALSE	FALSE	1	1	0	0	0	FALSE	a	1	154
YY009747	LYG	65.7166	F	TT	no	no	31.2176	0.979592	152.667	91.3333	1.23	6.59	1.07	17.132	439.399	20.93	6.09	89.2437	17.778	55.7	18.318	19.8286	130.875	116.588	5.935	130	78.2345	TRUE	FALSE	1	0	1	0	0	TRUE	b	0	155
YY009878	LYG	65.7331	F	CC	no	no	31.3465	0.833333	184.667	90.6667	1.9	6.23	1.24	9.598	274.556	10.63	4.73	97.1008	12.513	68.6	17.261	23.5431	123.918	136.333	8.4525	139.296	81.0691	FALSE	FALSE	1	1	0	0	0	FALSE	b	1	155
YY009578	LYG	57.9466	F	CC	no	no	27.9421	0.929293	171.333	106.667	2.65	5.19	1.22	8.718	330.554	12.08	4.33	102.695	15.368	85.7	28.308	19.7209	86.815	163.718	7.6075	134.587	86.1745	FALSE	TRUE	1	1	0	0	0	FALSE	a	0	156
YY009885	LYG	57.9576	F	CT	no	no	21.4354	0.765306	197.333	104	1.09	5.8	1.29	11.283	423.227	14.37	5.69	99.8613	13.248	71.5	21.603	19.7476	119.2	105.903	6.1225	160.667	81.3333	FALSE	FALSE	1	1	0	0	0	FALSE	a	1	156
YY009926	LYG	66.2204	F	CT	current	no	26.1412	0.913978	152	76	1.11	8.19	1.71	10.312	407.007	10.32	15.36	82.6623	18.849	103	28.556	19.5395	99.3975	144.945	9.875	137.871	72.3955	TRUE	FALSE	1	1	0	0	0	TRUE	b	1	157
YY010613	LYG	66.2505	F	CT	no	no	27.7308	0.980198	181.333	91.3333	0.97	7.12	1.9	8.931	477.666	8.97	5.37	96.119	11.437	42.7	16.395	17.2288	72.3775	102.297	5.755	141.266	77.865	FALSE	FALSE	1	1	0	0	0	FALSE	b	0	157
YY009950	LYG	62.3682	F	CT	no	no	26.4693	0.887755	159.333	89.3333	1.69	5.03	1.31	8.406	296.87	10.42	11.43	99.2274	17.989	65.2	32.414	14.3627	70.585	83.275	6.5575	138.76	78.4477	TRUE	TRUE	0	0	0	0	0	TRUE	a	1	158
YY010087	LYG	62.3354	F	CC	no	current	28.8644	0.932692	196.667	100	0.63	4.93	1.19	7.96	504.568	9.57	7.55	94.3776	12.772	60.3	26.193	20.8448	86.21	97.905	7.315	140.939	87.8117	FALSE	FALSE	1	1	0	0	0	FALSE	a	0	158
YY009978	LYG	59.2745	M	CT	current	current	22.5325	0.902439	184	119.333	1.1	6.2	1.65	5.552	416.52	16.8	5.27	102.228	14.318	118.3	25.25	19.5704	83.24	97.6625	8.94	164	90	FALSE	FALSE	1	0	0	0	0	FALSE	a	1	159
YY010471	LYG	59.2498	M	CT	past	past	26.2631	0.845361	172.667	131.333	1.21	5.93	1.37	11.48	755.12	21.13	5.81	93.1401	11.9	60.9	14.426	16.8172	78.3575	101.368	7.085	151.648	102.026	FALSE	TRUE	1	1	0	0	0	FALSE	a	0	159
YY010007	LYG	51.1431	F	TT	no	no	27.4064	0.891304	182	106	2.3	5.22	1.06	9.378	452.431	14.29	5.32	106.537	20.02	65.2	33.534	21.2939	119.79	155.262	9.7575	164.18	92.0221	FALSE	TRUE	1	0	0	0	0	FALSE	a	1	160
YY010832	LYG	51.217	F	TT	no	no	23.2207	0.870968	168	100	1.44	6.2	1.28	8.827	355.403	10.44	4.97	103.46	9.368	56.6	17.696	27.4826	131.4	146.048	11.675	129.178	80.5973	FALSE	FALSE	1	0	0	0	0	FALSE	a	0	160
YY010041	LYG	66.8966	M	TT	current	current	23.426	0.880435	151.333	70	1.8	7.33	1.34	8.308	443.475	13.44	6.27	94.9507	18.78	92.1	40.176	20.3045	110.71	117.65	8.565	131.725	72.0298	FALSE	FALSE	0	0	0	1	0	FALSE	a	0	161
YY010051	LYG	66.9569	M	TT	past	current	29.6875	0.881818	148.667	102	2.55	7.62	1.71	14.486	367.149	22.57	16.96	81.2586	22.1	92.4	35.284	14.7037	82.5	94.1675	6.735	141.302	79.8195	FALSE	FALSE	1	0	0	0	0	FALSE	a	1	161
YY010055	LYG	65.065	M	CC	no	past	23.2422	0.823529	164	94.6667	0.92	5.92	1.75	8.065	610.119	19.29	7.23	92.5585	19.281	73.7	34.007	18.9648	82.4475	89.4275	7.7625	139.654	83.7545	FALSE	TRUE	1	0	0	0	0	FALSE	b	1	162
YY010915	LYG	65.1088	M	CT	no	current	24.0449	0.978947	154.667	95.3333	1.24	5.3	1.28	5.575	302.69	12.97	9.45	92.0645	7.131	72.7	36.607	19.7895	83.635	85.6875	5.715	123.547	77.2922	FALSE	FALSE	0	0	0	0	0	FALSE	b	0	162
YY010073	LYG	72.9418	F	TT	current	current	44.0711	0.925532	168.667	98.6667	2.42	7.96	1.51	4.504	425.733	38.43	4.25	72.2333	18.828	95.8	29.915	16.2461	63.9975	100.502	8.225	140	86.6667	FALSE	FALSE	1	0	0	0	0	FALSE	b	1	163
YY010914	LYG	72.9254	F	CT	no	no	21.4031	0.965116	175.333	70.6667	0.87	5.13	1.3	13.176	371.607	13.11	7	88.11	8.328	36.1	16.413	19.4971	91.9	110.097	7.9275	147.084	68.6643	FALSE	FALSE	1	1	0	0	0	FALSE	b	0	163
YY010127	LYG	50.7543	M	TT	current	current	20.9877	0.932584	162	102.667	1.01	7.79	2.47	2.943	273.954	59.9	4.07	102.521	23.329	139.5	22.412	11.4699	64.3825	61.3375	4.6225	170.667	103.333	FALSE	FALSE	1	0	0	0	0	FALSE	a	1	164
YY010209	LYG	50.9322	M	CC	no	no	28.7885	0.852941	172.667	91.3333	1.75	6.1	1.29	8.728	416.847	14.69	5.02	103.635	19.461	105	28.229	15.4312	54.9875	124.953	6.0675	144.72	91.9798	FALSE	TRUE	1	1	0	0	0	FALSE	a	0	164
YY009908	LYG	75.3703	M	CC	current	no	23.3067	0.913978	166.667	100.667	0.69	5.17	1.18	4.336	297.474	14.3	4.52	85.9497	9.197	44.9	29.656	18.6928	75.78	120.165	7.9	135.279	79.4081	FALSE	TRUE	1	1	0	0	0	FALSE	a	0	165
YY010130	LYG	75.5838	M	CT	current	current	24.8842	0.822917	178.667	90	1.29	4.5	1.15	6.552	454.685	14.48	5.4	66.4449	12.334	103.8	18.646	16.8177	70.365	96.455	8.4225	135.841	76.9087	FALSE	TRUE	1	0	0	0	0	FALSE	a	1	165
YY010158	LYG	52.8077	M	CC	current	current	26.0146	0.942529	206	94.6667	0.57	5.39	1.87	4.007	344.934	12.25	6.9	106.29	11.842	102	36.427	14.0628	81.825	79.1975	6.34	163.815	87.3889	FALSE	FALSE	1	1	0	0	0	FALSE	b	1	166
YY010592	LYG	52.8131	M	CC	current	no	21.8906	0.883721	146.667	101.333	1.52	4.35	1.33	8.095	545.26	10.5	4.92	101.394	8.558	77.5	18.24	20.6502	89.46	150	8.725	128.938	86.4097	FALSE	FALSE	1	0	0	0	0	FALSE	b	0	166
YY010159	LYG	58.2341	F	CC	no	no	22.6422	0.928571	150.667	78.6667	2.24	5.69	0.88	7.584	467.41	9.98	4.19	109.187	16.78	92.6	33.221	16.0708	75.355	91.165	6.8175	139.667	88.6667	FALSE	FALSE	1	0	0	0	0	FALSE	b	1	167
YY010400	LYG	58.2286	F	CC	no	no	27.7007	0.888889	202.667	106.667	1.93	6.7	1.91	9.096	297.403	12.08	5.02	96.3342	13.739	88.5	18.265	23.4618	130.12	148.958	13.1375	161.347	89.36	FALSE	FALSE	1	1	0	0	0	FALSE	b	0	167
YY010210	LYG	74.7652	F	TT	current	no	21.9138	0.879518	188.667	104.333	2.4	7.57	1.95	4.428	352.86	31.49	6.01	87.1786	19.722	81.2	27.138	18.1427	90.435	109.093	8.41	143.54	82.0947	FALSE	FALSE	1	1	0	0	0	FALSE	a	1	168
YY010324	LYG	74.8309	F	TT	no	no	21.3557	0.958763	169.333	90.6667	2.35	7.47	0.98	6.841	325.185	27.96	4.57	85.7296	6.99	55.9	13.585	18.9151	101.828	188.322	10.0575	150.763	77.2023	FALSE	TRUE	1	1	0	0	0	FALSE	a	0	168
YY010129	LYG	73.2293	F	CT	no	no	22.1631	0.831461	160.667	86.6667	2.28	6	2.44	6.747	325.571	11.13	5.4	91.6987	21.471	111.6	18.747	18.9541	78.325	123.29	7.09	149.88	80.2035	FALSE	FALSE	0	0	0	0	0	FALSE	b	0	169
YY010233	LYG	73.3826	F	TT	past	no	31.4345	0.941176	210.667	91.3333	1.28	6.18	1.51	7.881	502.588	8.71	13.78	95.5544	14.39	60.8	9.507	14.7343	75.65	100.455	6.73	142.682	76.2626	FALSE	FALSE	1	0	1	0	0	FALSE	b	1	169
YY010234	LYG	61.5031	F	TT	no	no	23.9057	0.808511	176	89.3333	1.16	5.28	1.47	6.536	550.377	15.09	5.72	88.3297	17.921	84.4	20.639	15.3632	53.365	82.7275	4.4225	149.139	79.0852	FALSE	TRUE	1	0	0	0	0	FALSE	a	1	170
YY010732	LYG	61.4018	F	CT	no	no	24.5446	0.935484	178.667	99.3333	2.34	5.72	1.19	8.085	323.154	10.14	5.14	115.856	13.656	83.9	22.76	19.7011	84.3475	130.007	8.26	137.875	79.6665	FALSE	FALSE	0	0	0	0	0	FALSE	a	0	170
YY010253	LYG	64.8515	M	CT	current	current	22.6602	1.01099	172	68.6667	0.99	5.6	1.6	8.121	342.886	14.75	5.23	95.7347	13.631	82.9	25.851	18.6312	88.8225	111.805	9.7925	142.311	75.2409	FALSE	FALSE	1	0	0	0	0	FALSE	b	1	171
YY010917	LYG	64.835	M	CT	no	no	25.0051	0.94382	159.333	80.6667	1.63	6.53	1.77	9.965	244.673	17.74	6.01	106.099	7.426	80.2	33.9	NA	NA	NA	NA	127.943	70.5248	FALSE	FALSE	1	0	0	0	0	FALSE	b	0	171
YY010263	LYG	62.4038	M	CT	current	current	25.7657	0.929293	184	110	1.81	6.04	1.29	5.327	317.951	21.21	4.55	70.8253	10.935	104.9	32.055	17.8278	74.715	92.6725	4.835	144.435	87.7569	FALSE	FALSE	1	0	0	0	0	FALSE	a	1	172
YY010323	LYG	62.5051	M	CT	current	current	27.0256	0.95	163.333	92	1.1	4.8	1.14	7.13	296.77	12.71	4.49	95.2113	8.63	90.8	26.692	19.4764	70.44	120.37	9.5825	133.056	84.0661	FALSE	FALSE	0	0	0	0	0	FALSE	a	0	172
YY010175	LYG	74.5544	M	CT	current	current	20.3075	0.875	238	117.333	0.72	8.91	2.76	5.432	347.864	21.19	5.08	87.4336	17.168	97.7	54.044	17.9655	114.125	105.12	7.79	153.084	82.2235	FALSE	TRUE	1	1	0	1	0	FALSE	a	0	173
YY010356	LYG	74.809	M	CC	no	no	26.9111	0.989583	199.333	107.333	1.16	3.9	0.83	4.394	264.243	31	4.66	86.1443	8.291	28.6	12.367	19.1964	86.7075	110.097	5.0975	180.333	100	FALSE	FALSE	1	1	0	0	0	FALSE	a	1	173
YY010176	LYG	65.7166	M	TT	current	current	23.815	0.829787	147.333	91.3333	3.06	7.38	1.27	3.339	255.656	30.35	5.18	103.603	17.953	84.6	24.374	21.1401	82.565	130.01	5.4	127.639	79.8382	FALSE	FALSE	0	0	0	0	0	FALSE	a	0	174
YY010386	LYG	65.7796	M	TT	no	no	22.8659	0.866667	179.333	88.6667	0.65	5.1	1.58	4.907	376.396	13.67	4.76	81.5855	15.247	96.3	26.951	17.3172	72.64	123.207	7.7475	121.521	71.3709	FALSE	FALSE	0	0	0	0	0	FALSE	a	1	174
YY010407	LYG	67.3484	M	CT	current	current	20.8666	0.853933	198.667	86.6667	1.63	6.46	1.34	6.473	315.791	13.68	5.43	88.9653	16.144	93.9	29.76	17.2111	97.865	108.75	10.275	155.311	83.5975	FALSE	TRUE	1	1	0	0	0	FALSE	a	1	175
YY010814	LYG	67.4086	M	TT	past	current	26.2046	0.865385	176.667	76.6667	1.45	6.15	1.38	5.124	299.704	20.43	6.42	90.3881	7.429	94.3	19.054	25.5588	128.748	116.29	12.415	140.821	77.7049	FALSE	FALSE	1	1	0	0	0	FALSE	a	0	175
YY010440	LYG	68.3696	F	CT	no	no	28.1583	0.852941	175.333	101.333	3.26	3.86	1.16	10.664	282.353	11.77	6.82	92.0411	14.169	61.7	30.089	19.1044	94.4925	123.425	6.665	144.237	84.7278	FALSE	TRUE	0	0	1	0	0	FALSE	a	1	176
YY010888	LYG	68.3012	F	CT	no	no	25.3702	0.902174	188	82.6667	2.5	6.01	1.22	13.97	421.2	12.78	4.25	90.4534	12.003	80	29.428	22.4823	96.2625	120.76	6.4875	149.502	85.7669	FALSE	FALSE	1	0	0	0	0	FALSE	a	0	176
YY010483	LYG	60.219	M	CT	current	current	28.049	0.946237	161.333	88.6667	1.25	6.18	1.43	5.309	315.474	13.77	5.7	86.5478	13.1	105.4	25.797	18.6058	95.015	107.325	9.0575	134.926	80.3345	FALSE	TRUE	1	1	0	0	0	FALSE	b	1	177
YY010549	LYG	60.3723	M	CT	no	past	24.1138	0.767442	149.333	89.3333	0.45	6.02	2.23	9.16	476.96	8.84	5.66	98.1986	12.848	65.5	36.238	18.1146	117.855	93.14	9.7075	147.073	81.8191	FALSE	TRUE	1	0	0	0	0	FALSE	b	0	177
YY010534	LYG	70.1629	F	TT	current	no	27.0882	1.01042	144.667	73.3333	1.07	5.98	1.62	8.13	356.158	10.99	5.34	77.0308	11.382	34.9	24.822	15.9038	81.435	94.2675	6.2125	141.719	74.6687	FALSE	FALSE	0	0	0	0	0	FALSE	a	1	178
YY010853	LYG	70.0753	F	TT	no	no	20.5011	0.837209	160.667	80.6667	1.34	6.41	1.62	11.979	328.698	16.35	5.17	84.91	10.373	47.8	23.4	26.245	142.083	118.082	7.2325	138.788	74.7098	FALSE	FALSE	1	1	0	0	0	FALSE	a	0	178
YY010115	LYG	72.6352	F	CC	no	no	27.7671	0.854167	156	78.6667	1.97	6.42	1.29	11.995	307.507	10.9	6.29	94.6111	16.531	136	28.976	17.0095	96.6925	109.002	7.065	143.823	76.9643	FALSE	TRUE	1	1	0	0	0	FALSE	b	0	179
YY010633	LYG	72.679	F	CC	no	no	23.9859	0.852273	164.667	93.3333	0.89	5.97	1.58	11.484	488.334	13.6	6.59	79.1397	16.736	51.3	16.697	20.3629	158.2	118.215	9.69	150.333	82.6667	FALSE	TRUE	1	0	0	0	0	FALSE	b	1	179
YY010189	LYG	58.2094	F	CT	no	no	23.6832	0.757895	170.667	95.3333	1.76	8.16	1.55	10.33	343.195	11.92	5.88	105.149	21.059	90.8	32.208	17.8061	70.69	110.28	6.795	135.371	84.3448	FALSE	FALSE	1	0	0	0	0	FALSE	b	0	180
YY010640	LYG	58.2396	F	CT	no	no	29.1111	0.892473	179.333	98.6667	1.32	6.38	1.47	6.072	701.997	9.8	5.15	99.6636	13.934	75.8	11.537	18.7632	124.407	107.1	8.1	157.515	89.2974	FALSE	FALSE	1	1	0	0	0	FALSE	b	1	180
YY010589	LYG	62.4257	F	TT	no	no	19.5551	0.840909	161.333	103.333	1.65	5.07	1.8	5.281	242.572	15.57	4.82	93.6898	16.5	94.9	16.526	17.9832	114.123	92.59	6.4525	159.828	95.9218	FALSE	FALSE	1	1	0	0	0	FALSE	b	0	181
YY010745	LYG	62.0945	F	CT	no	no	20.7553	0.841463	200.667	123.333	1.17	6.73	2.05	8.164	320.396	14.51	5.46	93.702	16.425	99	10.143	18.4416	79.5625	105.608	5.395	132.593	83.6274	FALSE	TRUE	1	0	0	0	0	FALSE	b	1	181
YY010730	LYG	66.0643	F	CC	no	no	25.9215	0.891304	176	95.3333	0.84	6.52	1.77	17.585	467.981	9.74	5.08	87.1707	10.083	64.2	16.506	19.761	94.085	111.095	7.9025	141.41	85.7205	FALSE	FALSE	1	1	0	0	0	FALSE	a	0	182
YY010792	LYG	65.9083	F	CT	no	no	24.6349	0.925532	209.333	102	1.87	8.18	1.39	5.278	370.654	15.76	5.81	85.4785	12.977	83.9	35.812	20.0329	99.445	103.965	5.8375	128.089	81.3556	FALSE	FALSE	1	1	0	0	0	FALSE	a	1	182
YY010367	LYG	64.8734	F	TT	no	no	23.3377	0.914894	199.333	97.3333	1.51	6.69	1.6	4.572	409.356	15.54	6.17	93.6138	10.685	63	16.106	18.1266	100.868	104.983	9.1025	153.949	81.8696	FALSE	FALSE	1	0	0	0	0	FALSE	a	0	183
YY010817	LYG	64.8843	F	CT	no	no	25.8876	0.968421	197.333	99.3333	1.79	6.19	1.2	7.172	324.829	9.97	6.71	94.8311	8.808	81.3	30.773	19.8047	109.358	102.28	8.3075	147.038	74.2792	FALSE	FALSE	1	0	0	0	0	FALSE	a	1	183
YY010251	LYG	53.514	F	TT	past	no	32.6701	0.910714	180.667	108.667	1.66	6.66	1	6.741	297.664	10.07	6.45	105.873	17.184	62.1	12.156	17.8973	107.31	130.812	6.655	122.68	82.4667	FALSE	FALSE	1	0	0	0	0	FALSE	a	0	184
YY010845	LYG	53.5031	F	CT	no	no	28.6288	0.903846	181.333	97.3333	11.05	4.97	1.14	16.838	468.483	8.58	13.26	115.139	18.495	94.3	33.466	19.2612	117.765	148.845	9.445	160.895	106.073	FALSE	TRUE	1	1	0	0	0	FALSE	a	1	184
YY010848	LYG	48.334	F	CT	no	no	30.3885	0.852941	167.333	111.333	2.32	5.7	1.25	7.939	275.091	12.17	4.92	99.2979	9.498	57.7	32.281	21.1661	100.525	119.95	9.485	147.458	91.9126	FALSE	FALSE	1	1	0	0	0	FALSE	a	1	185
YY010896	LYG	48.3121	F	CT	no	no	29.8917	0.960784	148.667	90	0.97	4.92	1.37	12.006	331.076	9.98	4.83	103.171	5.963	48.5	16.158	27.0896	123.817	125.545	8.63	125.899	78.0163	FALSE	FALSE	1	0	0	0	0	FALSE	a	0	185
YY011034	LYG	66.8282	F	CT	no	no	27.7662	0.950495	170.667	100.667	2.26	6.92	1.43	8.338	327.368	15.69	12.08	97.1972	12.784	77.6	18.957	20.986	124.248	113.865	7.315	140.697	83.6076	FALSE	FALSE	1	0	0	0	0	FALSE	b	1	186
YY011456	LYG	66.768	F	TT	no	no	25.9695	0.868687	155.333	79.3333	0.82	5.5	1.05	5.641	217.795	21.85	4.53	80.0117	9.915	69.4	26.461	21.0297	126.97	88.765	8.7875	124.039	75.2507	FALSE	TRUE	1	0	0	0	0	FALSE	b	0	186
YY011058	LYG	68.3368	F	TT	no	current	32.8824	0.913043	159.333	94.6667	1.07	5.38	1.13	5.993	532.484	35.71	5.8	72.7587	5.492	65.7	13.956	20.7741	124.993	144.53	8.0025	183	103	FALSE	TRUE	0	0	0	0	0	FALSE	a	1	187
YY011436	LYG	68.5202	F	CT	no	no	28.6215	0.931373	170.667	87.3333	2.78	6.1	1.15	5.411	322.113	11.49	5.18	96.2446	9.8	45	20.812	22.7354	97.6925	140.5	8.8125	135.672	78.3607	FALSE	FALSE	1	1	0	0	0	FALSE	a	0	187
YY011114	LYG	49.9357	F	CC	no	no	27.8805	0.891304	160.667	99.3333	1.74	5.53	1.28	9.422	284.012	8.91	5.71	92.0109	8.219	66.8	34.236	18.2568	104.483	123.998	6.915	130.812	85.1512	FALSE	TRUE	1	1	0	0	0	FALSE	a	1	188
YY012100	LYG	49.7796	F	CC	no	no	21.7865	0.8	151.333	96.6667	1.01	4.37	1.32	9.247	341.99	8.76	5.68	105.895	5.044	41	15.991	19.6796	101.815	97.53	6.7225	129.798	82.0093	FALSE	TRUE	1	1	0	0	0	FALSE	a	0	188
YY011118	LYG	65.7851	M	CT	no	no	21.1553	0.857143	159.333	109.333	1.2	5.61	1.39	6.185	368.8	13.58	4.71	100.317	8.278	91.6	38.198	24.866	126.485	125.147	8.3375	157.667	100.667	FALSE	TRUE	1	1	0	0	0	FALSE	b	1	189
YY011169	LYG	65.744	M	TT	current	current	32.192	1.14444	175.333	101.333	1.4	7.68	1.82	4.613	316.001	63.29	5.64	97.2445	9.83	82.9	15.702	17.6181	83.055	107.677	5.16	165.707	96.9639	FALSE	FALSE	1	1	0	0	0	FALSE	b	0	189
YY011123	LYG	61.2211	F	TT	no	no	30.1785	0.921569	178	100	3.54	6.36	0.89	5.994	428.554	16.16	5.8	110.202	12.096	79	24.151	24.2516	135.907	139.95	10.8875	129.067	82.913	FALSE	TRUE	1	1	0	0	0	FALSE	b	1	190
YY011518	LYG	61.2758	F	CT	no	no	27.1203	0.89	147.333	90.6667	1.7	6.18	1.11	6.35	418.901	11.91	5.69	97.3831	6.214	70.5	26.308	21.3449	123.465	113.125	8.3375	135.493	86.3672	FALSE	TRUE	1	0	0	0	0	FALSE	b	0	190
YY011186	LYG	59.1211	F	CC	no	no	25.5309	0.933333	179.333	100.667	2.34	6.13	1.5	12.767	517.613	12.08	14.44	96.6962	11.845	75.4	16.482	21.4836	144.735	101.903	11.7675	133.677	80.9537	FALSE	TRUE	1	0	1	0	0	FALSE	a	1	191
YY011204	LYG	59.05	F	TT	no	no	26.6046	0.85	164	92.6667	1.89	6.2	1.42	13.682	413.373	13.14	5.3	96.6355	9.945	84.6	16.791	22.738	118.683	109.005	11.2525	137.197	81.0114	FALSE	TRUE	1	0	0	0	0	FALSE	a	0	191
YY011161	LYG	45.4648	F	CC	no	no	34.765	0.918182	154.667	103.333	3.12	6.41	0.89	10.953	501.133	7.05	6.16	125.815	10.758	74.9	22.671	22.321	122.04	155.48	10.6125	155.683	99.1498	FALSE	TRUE	1	1	0	0	0	FALSE	b	0	192
YY011286	LYG	45.3662	F	CT	no	no	32.0161	1.01	228	133.333	2.8	6.72	1.33	9.436	251.732	13.01	9.99	102.169	7.453	75	14.743	19.9341	114.627	115.267	9.14	151.704	102.611	FALSE	TRUE	1	0	1	0	0	TRUE	b	1	192
YY011306	LYG	59.8631	M	CT	current	current	27.9049	0.980392	160.667	90.6667	1.3	6.37	1.69	8.295	307.401	15.52	5.46	79.9282	8.814	92.6	23.129	22.1076	101.175	118.315	8.385	158.138	90.8673	FALSE	FALSE	1	0	0	0	0	FALSE	b	1	193
YY012281	LYG	59.8987	M	CC	no	no	28.0855	0.989796	158	103.333	1.73	5.21	1.21	4.848	312.696	13.22	5.03	94.4527	7.853	76.3	13.046	19.1199	85.56	68.6375	4.76	149.128	95.4659	FALSE	FALSE	1	1	0	0	0	FALSE	b	0	193
YY011355	LYG	62.9158	M	CT	current	current	25.3155	0.861702	192	100.667	1.76	5.23	1.02	6.192	207.318	22.45	5.09	98.5023	5.412	50.6	19.336	23.7821	111.02	142.298	8.9775	193.682	105.406	FALSE	FALSE	1	1	0	0	0	FALSE	b	1	194
YY012115	LYG	62.9049	M	CT	no	no	24.9108	0.833333	150	88	1.16	6.26	1.71	4.848	300.849	15.11	5.63	93.2419	10.294	54.4	23.989	19.9404	77.2625	109.985	8.3975	134.102	84.1719	FALSE	TRUE	1	1	0	0	0	FALSE	b	0	194
YY011366	LYG	58.4148	M	CT	past	current	21.0077	0.829787	185.333	98	0.98	6.1	1.42	5.578	247.377	12.53	5.19	91.1831	6.324	106.9	15.336	21.8089	97.08	120.675	9.3525	149.838	90.067	FALSE	FALSE	1	0	0	0	0	FALSE	a	1	195
YY012210	LYG	58.5489	M	CT	current	current	21.4536	0.808511	160.667	89.3333	2.72	5.64	1.07	9.167	338.981	14.93	4.85	101.507	5.736	68.7	17.173	24.3751	172.765	119.655	8.6175	140.264	78.4299	FALSE	FALSE	1	0	0	0	0	FALSE	a	0	195
YY011370	LYG	60.5147	M	TT	current	no	25.2691	0.87234	160	100	3.17	7.4	1.25	3.137	259.425	77.28	5.28	94.1982	9.187	69.4	19.999	20.9864	91.845	140.037	8.7575	131.029	89.0977	FALSE	FALSE	1	1	0	0	0	FALSE	b	1	196
YY012084	LYG	60.46	M	TT	no	current	23.2434	0.9	210	100.667	1.9	8.21	2.57	4.184	417.821	29.36	5.96	96.7009	9.781	135.5	33.151	20.7158	85.04	142.838	8.7625	139.084	84.9073	FALSE	TRUE	1	1	0	0	0	FALSE	b	0	196
YY011145	LYG	71.5784	M	CT	past	past	29.2	0.952381	148	85.3333	6.22	5.75	0.88	NA	NA	17.25	4.93	95.5257	14.11	70.4	26.912	22.0022	118.938	139.06	6.45	135.459	76.7831	FALSE	TRUE	1	1	0	0	0	FALSE	b	0	197
YY011403	LYG	71.5921	M	CT	current	no	20.8325	0.852273	162	100.667	3.53	8.87	2.64	9.204	438.415	17.05	5.34	93.6932	12.863	156	29.57	20.0907	81.4925	442.048	10.085	156.853	87.741	FALSE	TRUE	1	1	0	0	0	FALSE	b	1	197
YY011413	LYG	67.6906	M	CT	past	no	27.1018	0.901961	146.667	85.3333	2.7	5.9	1.27	10.353	270.793	12.83	7.38	93.6732	12.85	86.9	26.976	21.8533	90.305	120.22	8.125	146.667	88.6667	FALSE	TRUE	0	0	0	0	0	FALSE	a	1	198
YY011821	LYG	67.77	M	CC	no	current	19.1953	0.870588	161.333	88.6667	1.27	5.54	1.86	16.126	293.492	15.96	6.5	90.9189	8.586	67.7	25.024	21.0798	95.995	91.9325	7.3625	135.658	76.2061	FALSE	FALSE	1	1	0	0	0	FALSE	a	0	198
YY011430	LYG	60.4381	F	CT	no	no	31.3465	0.862745	158	92	4.3	6.2	1.24	3.805	291.854	14.71	4.57	96.4092	10.4	94.8	20.942	22.9538	125.272	135.407	7.375	170.667	84.6667	FALSE	FALSE	0	0	0	0	0	FALSE	b	1	199
YY011920	LYG	60.3559	F	CT	no	no	28.9811	1.00943	170.667	96.6667	1.49	7.26	1.81	18.741	447.942	9.65	9.31	93.9868	8.22	62.7	29.985	24.176	90.735	116.23	9.74	135.662	84.7968	FALSE	FALSE	1	0	1	0	0	FALSE	b	0	199
YY011444	LYG	59.8987	F	CT	no	no	27.2686	0.864078	170.667	90	0.93	6.51	1.81	5.82	310.386	10.89	4.82	98.0342	8.301	69.4	14.544	22.3273	115.775	123.868	10.5275	128.667	84	FALSE	TRUE	1	1	0	0	0	FALSE	b	1	200
YY011572	LYG	59.9452	F	CC	no	past	26.6193	0.865385	135.333	78	2.24	4.05	1.11	9.289	398.746	13.23	5.56	70.1474	7.284	72.9	29.266	23.6539	108.42	144.162	8.395	134.578	78.8398	FALSE	TRUE	1	0	0	0	0	FALSE	b	0	200
YY011100	LYG	53.3087	M	CT	no	current	25.711	0.907216	158	90.6667	5.43	6.3	1.27	7.796	373.677	12.3	6.81	108.829	9.724	143.4	24.205	20.2384	72.7025	146.83	6.9325	129.138	76.4547	FALSE	FALSE	1	0	0	0	0	FALSE	a	0	201
YY011604	LYG	53.2485	M	CT	past	no	24.1633	0.823529	190	110	1.33	5.91	1.33	8.842	411.276	14.82	6.29	101.491	8.343	96.1	25.746	19.1002	106.295	132.678	8.54	167.548	93.0547	FALSE	TRUE	1	1	0	0	0	FALSE	a	1	201
YY011267	LYG	63.1595	F	CT	no	no	26.2985	0.887755	143.333	87.3333	4.18	5.21	0.85	10.739	362.516	12.94	4.89	104.477	10.908	66.6	22.035	23.9585	132.32	110.575	9.665	134.791	84.3691	FALSE	FALSE	1	0	0	0	0	FALSE	b	0	202
YY011608	LYG	63.1923	F	CT	no	no	27.1918	0.815534	199.333	101.333	1.94	4.91	1.28	6.997	408.085	9.43	5.32	84.1334	8.178	74.1	21.249	22.6288	119.632	116.245	9.745	159.333	90	FALSE	TRUE	1	1	0	0	0	FALSE	b	1	202
YY011603	LYG	61.3224	M	TT	current	current	23.0112	0.875	209.333	108.667	1.03	5.17	2.21	9.417	518.216	12.11	5.82	100.507	7.243	73.1	25.378	20.202	117.543	95.9675	10.1225	135.407	77.856	FALSE	FALSE	1	0	0	0	0	FALSE	b	0	203
YY011622	LYG	61.2977	M	TT	current	no	25.565	0.952381	130	80	2	4.61	1.05	4.587	378.418	20.68	5.41	97.0396	7.67	94	18.241	21.7502	67.6575	114.81	5.9625	127.434	72.6641	FALSE	TRUE	0	0	0	0	0	FALSE	b	1	203
YY011628	LYG	66.0233	F	CT	no	no	27.8497	1.02941	221.333	100	3.36	6.45	1.27	5.801	406.65	10.8	6.92	85.4095	13.058	118.6	20.349	25.2367	134.575	131.692	9.8475	162.25	75.8255	FALSE	TRUE	1	1	1	1	1	FALSE	b	1	204
YY012043	LYG	66.0397	F	CT	no	no	30.4076	0.854369	147.333	94	2.24	6.11	1.26	7.206	336.007	14	5.62	93.7269	7.657	51.9	8.886	20.5757	103.47	150.958	7.415	125.053	80.0509	FALSE	TRUE	1	1	1	0	0	FALSE	b	0	204
YY011607	LYG	72.3669	M	CC	past	past	20.4152	1	179.333	110.667	1.2	5.99	2.53	7.822	319.001	12.43	4.38	86.6732	6.558	69.5	28.007	20.6669	110.498	101.793	8.1425	142.16	85.2315	FALSE	FALSE	1	1	0	0	0	FALSE	b	0	205
YY011663	LYG	72.3258	M	CC	no	current	29.5159	0.9	172.667	85.3333	1.93	7.97	1.34	6.549	415.28	15.47	4.96	84.8781	9.104	80.5	23.23	23.3271	91.6325	125.42	9.0925	154.032	84.7107	FALSE	FALSE	1	1	0	0	0	FALSE	b	1	205
YY011277	LYG	62.9322	F	TT	no	no	20.8889	0.777778	149.333	84.6667	1.49	5.22	2.02	9.955	596.46	9.42	7.25	99.0955	7.413	55.4	21.68	20.1906	128.35	130.093	8.935	131.203	79.9175	FALSE	FALSE	1	0	0	0	0	FALSE	a	0	206
YY011704	LYG	62.9487	F	CT	no	no	22.5069	1.03297	177.333	104	1.96	6.98	1.58	8.137	298.326	13.72	7.06	84.5841	8.42	57.5	20.946	20.2781	128.695	116.91	7.065	160.889	99.8776	FALSE	TRUE	1	1	0	0	0	FALSE	a	1	206
YY010972	LYG	59.6194	F	CT	no	no	25.6544	0.865979	175.333	96	1.54	5.74	1.39	7.549	525.691	10.27	5.91	101.698	5.369	71.1	26.491	21.3151	130.317	126.21	17.2375	134.114	81.9606	FALSE	TRUE	1	1	0	0	0	FALSE	a	0	207
YY011747	LYG	59.54	F	CT	no	no	33.5938	0.864407	157.333	104	1.5	6.78	1.47	8.259	329.507	14.53	6.34	76.0097	9.126	58.4	18.688	21.4526	130.718	97.05	8.51	144.052	94.553	FALSE	TRUE	1	0	0	1	0	FALSE	a	1	207
YY011752	LYG	63.0746	M	TT	no	no	21.0772	0.818182	189.333	79.3333	1.64	5.33	1.34	3.982	331.144	11.74	14.19	99.9257	7.244	73.4	18.464	20.7108	135.305	96.5525	8.6675	137.402	75.6293	FALSE	TRUE	1	1	0	0	0	FALSE	a	1	208
YY011863	LYG	63.0472	M	CT	past	current	26.6389	0.876289	152.667	96.6667	0.93	5.48	1.43	11.851	431.547	10.47	4.64	107.525	6.589	103.6	23.585	21.1368	112.835	128.845	7.5975	139.405	84.0053	FALSE	TRUE	1	1	0	0	0	FALSE	a	0	208
YY010998	LYG	56.2546	M	CT	current	current	22.7204	0.861702	170	108.667	NA	NA	NA	5.117	359.679	NA	NA	NA	8.392	120.3	47.571	18.5188	89.2525	143.197	7.8975	139.099	89.3914	FALSE	FALSE	1	1	0	0	0	FALSE	a	0	209
YY011781	LYG	56.2437	M	CC	current	current	21.2031	0.891304	168.667	95.3333	1.59	5	1.94	11.793	389.471	13.24	5.68	99.8397	12.244	120.2	25.3	21.4852	94.7275	121.68	7.65	155.062	87.4848	FALSE	FALSE	1	1	0	0	0	FALSE	a	1	209
YY011136	LYG	62.5216	F	TT	no	no	25.3936	0.954545	163.333	108	1.88	6.46	1.19	9.395	281.583	13.36	5.16	83.4706	12.59	79.3	33.728	22.631	127.015	124.595	8.5	141.444	96.3088	FALSE	TRUE	1	0	0	0	0	FALSE	b	0	210
YY011799	LYG	62.4394	F	CT	no	no	30.7004	0.915888	170.667	100	1.96	8.19	1.31	10.615	342.304	10.91	4.97	96.6489	13.524	84.8	19.982	22.2785	101.953	92.945	8.085	143.049	91.9037	FALSE	FALSE	1	1	0	0	0	FALSE	b	1	210
YY011129	LYG	48.4928	M	CC	past	current	27.7333	0.970874	134	93.3333	2.67	6.79	0.92	10.761	502.315	14.43	7.82	105.06	11.198	90.9	29.208	22.3729	89.075	130.838	7.78	128.091	84.5446	FALSE	TRUE	1	0	0	0	0	TRUE	a	0	211
YY011830	LYG	48.3422	M	CT	current	current	29.6296	0.943925	205.333	140	2.05	6.2	1.16	5.565	341.046	10.91	5.03	107.638	9.408	58.5	20.793	20.3566	106.405	131.042	8.385	181.271	126.591	FALSE	FALSE	1	0	0	0	0	FALSE	a	1	211
YY011028	LYG	46.8118	M	CT	current	current	24.7409	0.938776	152	106	2.35	6.09	1.14	6.384	335.427	16.98	6.07	98.3412	6.768	86.5	18.893	21.1408	83.3775	156.07	9.5775	133.332	93.5632	FALSE	TRUE	0	0	0	0	0	FALSE	a	0	212
YY011858	LYG	46.8392	M	CC	no	current	25.2174	0.840426	180	109.333	1.57	5.18	1.23	6.692	280.456	16.64	4.14	99.6479	9.167	79.5	46.648	21.9513	96.815	90.5925	6.2425	141.667	85	FALSE	TRUE	1	0	0	0	0	FALSE	a	1	212
YY011905	LYG	68.2026	F	CC	no	no	24.974	0.955556	177.333	97.3333	3.25	8.05	2.48	4.129	835.783	15.16	5.35	59.2369	13.725	122.1	16.813	21.4538	106.925	153.532	10.305	141.032	77.6792	FALSE	TRUE	1	1	0	0	0	FALSE	a	1	213
YY012016	LYG	67.9671	F	CT	no	current	26.9127	0.913043	212.667	98.6667	2.22	6.35	1.49	11.922	436.439	11.56	5.11	92.4665	9.911	40.2	27.235	20.6708	101.86	96.81	6.6925	131.733	77.1039	FALSE	FALSE	1	0	0	0	0	FALSE	a	0	213
YY011192	LYG	73.796	F	CT	no	no	22.806	0.857143	159.333	80.6667	4.38	6.43	1.26	7.552	381.889	12.29	5.52	90.9225	13.818	78.1	18.842	22.4751	106.275	107.3	8.295	126.975	79.1871	FALSE	TRUE	1	1	0	0	0	FALSE	a	0	214
YY011989	LYG	74.0096	F	CC	no	no	19.7777	0.847059	154	88	4.57	7.83	1.12	7.644	312.588	22.55	7.01	43.8875	18.433	94	22.657	21.2904	114.125	118.63	5.0775	149.566	86.7266	FALSE	TRUE	0	0	0	0	0	FALSE	a	1	214
YY012011	LYG	52.167	M	CT	no	current	30.8463	0.914286	153.333	99.3333	1.62	5.93	0.96	8.342	528.52	14.16	4.85	98.9245	8.171	82.1	13.447	20.5326	120.013	130.773	9.345	170	108.667	FALSE	FALSE	1	0	0	0	0	FALSE	a	1	215
YY012237	LYG	52.1834	M	TT	current	no	25.0865	0.833333	143.333	103.333	2.12	4.67	1.32	8.976	483.429	19.19	5.3	73.9012	8.354	87	22.57	21.2092	107.72	109.683	8.6725	122.164	91.6332	FALSE	TRUE	1	1	0	0	0	FALSE	a	0	215
YY011345	LYG	65.3799	F	CC	no	no	26.986	0.88785	221.333	108.667	2.17	6.13	1.29	9.318	256.3	15.17	4.98	76.6925	8.795	76.8	24.342	21.1203	120.805	111.195	8.5125	155.151	92.3597	FALSE	TRUE	1	1	0	0	0	FALSE	a	0	216
YY012045	LYG	65.347	F	CC	no	no	19.5556	1.01205	156	85.3333	2.03	6.08	1	10.329	385.688	13.34	10.87	102.407	9.049	66.1	19.142	17.9313	122.683	145.113	8.92	154.952	83.6894	FALSE	FALSE	0	0	0	0	0	FALSE	a	1	216
YY010990	LYG	62.7981	M	TT	current	no	26.5731	0.950495	157.333	108	NA	NA	NA	3.602	352.258	NA	NA	NA	7.324	88.4	25.008	20.2198	77.085	116.93	7.665	152.118	95.414	FALSE	TRUE	1	1	0	0	0	FALSE	a	0	217
YY012047	LYG	62.7953	M	TT	no	current	28.7317	0.95	197.333	119.333	1.18	6.08	1.56	5.49	263.94	57.57	5.54	69.0083	6.793	63.8	27.766	20.9772	114.778	90.675	6.7175	140	86	FALSE	FALSE	1	0	1	0	0	FALSE	a	1	217
YY011505	LYG	53.4264	M	CT	current	current	27.2173	0.951923	185.333	110.667	0.58	3.82	1.28	11.915	258.32	13.08	5.51	103.672	5.998	88.7	25.446	21.6071	89.3825	113.172	6.52	144.702	87.1987	FALSE	FALSE	1	0	0	0	0	FALSE	a	0	218
YY012053	LYG	53.4593	M	CT	current	current	25.7117	0.892473	180.667	100.667	1.55	5.32	1.25	6.153	408.547	12.49	6.18	84.2855	8.399	96.3	20.126	21.4089	100.502	118.13	8.5725	143	88.3333	FALSE	FALSE	1	0	0	0	0	FALSE	a	1	218
YY010940	LYG	47.9206	M	CT	no	no	22.3212	0.866667	144.667	84.6667	0.69	5.06	1.11	11.588	466.048	11.98	6.01	102.522	6.321	76.9	39.914	20.2024	102.123	110.368	9.49	136.105	82.8319	FALSE	TRUE	0	0	0	0	0	FALSE	a	0	219
YY012055	LYG	47.9179	M	CT	past	past	32.8256	0.958763	201.333	121.333	1.43	6.41	1.13	6.826	583.3	15.25	6.51	56.2266	9.386	91.2	26.98	20.62	82	149.715	6.87	175.173	114.35	FALSE	TRUE	1	1	0	0	0	FALSE	a	1	219
YY012145	LYG	50.653	F	CT	no	no	24.1288	0.945055	240.667	120	1.78	5.3	1.49	9.365	433.436	9.44	4.94	103.629	7.243	68.2	17.401	21.2855	113.312	91.2425	9.5225	168.953	98.7921	FALSE	TRUE	1	1	0	0	0	FALSE	b	1	220
YY012265	LYG	50.6229	F	CT	no	no	23.0681	0.869565	154.667	89.3333	1.45	4.45	1.03	8.242	478.448	8.59	5.64	102.242	6.703	46.5	13.986	21.0221	140.28	85.6725	11.4675	130.667	80.8409	FALSE	FALSE	0	0	0	0	0	FALSE	b	0	220
YY011749	LYG	60.9555	M	CT	past	no	26.9896	0.948454	157.333	94.6667	2.86	4.05	0.88	4.561	364.481	17.32	5.5	92.6581	7.908	64.7	22.397	19.6593	91.37	103.257	7.4325	137.772	85.0651	FALSE	TRUE	0	0	0	0	0	FALSE	b	0	221
YY012167	LYG	60.9637	M	CT	no	no	27.0993	0.969388	160.667	94	1.35	5.51	1.28	10.279	415.195	12.06	12.29	95.6969	8.825	65.9	19.943	18.7747	76.1225	87.2575	6.6475	128.036	80.7549	FALSE	FALSE	1	0	0	0	0	FALSE	b	1	221
YY011517	LYG	59.9206	F	CC	no	no	26.0375	0.938776	176.667	88	1.53	4.47	1	10.207	404.146	10.83	6.38	100.103	7.987	56	23.278	20.9195	99.3475	132.195	8.22	141.958	82.8029	FALSE	FALSE	1	0	0	0	0	FALSE	b	0	222
YY012197	LYG	59.8768	F	CT	current	no	20.8247	0.829545	243.333	131.333	1.26	6.51	1.62	8.595	505.301	17.55	4.49	37.0829	12.006	129.4	33.437	22.7645	102.188	67.7275	6.7875	162.568	98.6432	FALSE	TRUE	1	1	0	0	0	FALSE	b	1	222
YY011085	LYG	62.7707	M	CT	current	no	25.4354	0.821053	193.333	105.333	1.01	4.72	1.11	6.329	267.018	18.51	5.43	79.8125	6.632	80.2	22.403	20.6067	88.7225	120.353	7.2125	141.781	87.3043	FALSE	TRUE	1	1	0	0	0	FALSE	b	0	223
YY012266	LYG	62.7789	M	CT	past	current	26.6728	0.86	208.667	118	1.44	6.31	1.75	5.686	558.843	17.66	4.32	71.7001	11.415	90	22.346	18.3442	92.895	64.59	6.0775	168.333	105.667	FALSE	TRUE	0	0	0	0	0	FALSE	b	1	223
YY012319	LYG	67.2142	F	CT	current	no	23.1111	0.966667	188	110	1.92	7.98	1.48	4.158	295.063	10.74	5.85	100.918	11.042	54.4	10.516	21.055	131.507	94.8225	7.09	180	89.3333	FALSE	TRUE	0	0	0	0	0	FALSE	a	1	224
YY012751	LYG	67.0637	F	TT	no	no	24.6355	0.934783	212.667	85.3333	1.9	6.98	1.35	6.895	387.793	34.01	5.6	89.2645	12.408	70.8	24.604	18.7379	69.4775	91.3675	5.35	154.217	78.2413	FALSE	FALSE	1	1	0	0	0	FALSE	a	0	224
YY012348	LYG	51.3867	M	CT	current	current	20.9572	0.955556	180	90	1.05	5.18	2.48	7.42	244.059	22.5	4.24	100.327	11.002	137.4	22.547	21.7843	120.255	112.037	11.5125	158.426	85.7365	FALSE	FALSE	1	0	0	0	0	FALSE	a	1	225
YY012408	LYG	51.2827	M	CC	no	no	28.6477	0.971429	158	110.667	1.19	6.09	1.11	11.055	445.29	9.5	5.92	97.0208	8.102	73.9	12.744	21.4529	90.305	92.93	9.035	133.511	89.2383	FALSE	TRUE	1	0	0	0	0	FALSE	a	0	225
YY012414	LYG	57.128	F	CC	no	no	25.014	0.978495	153.333	94	2.35	8.4	1.73	11.32	616.317	11.01	21.82	103.701	12.276	80.6	18.585	19.6123	129.95	82.945	8.1725	125.898	77.8223	TRUE	TRUE	1	0	1	0	0	TRUE	b	1	226
YY012778	LYG	57.1444	F	CT	no	no	25.7643	0.858586	179.333	90.6667	1.6	6.56	1.27	9.495	557.949	17.47	7.51	102.27	9.538	57.9	12.876	22.502	123.368	89.7025	9.0475	136.375	86.9304	FALSE	TRUE	0	0	0	0	0	FALSE	b	0	226
YY012312	LYG	52.9446	F	CT	no	no	27.2392	0.881188	200	102	1.38	4.76	0.84	7.422	430.871	10.97	5.01	97.6207	9.168	33.1	33.039	20.8135	109.615	91.635	5.5775	158.897	89.79	FALSE	FALSE	1	0	0	0	0	FALSE	b	0	227
YY012447	LYG	53.1472	F	TT	no	no	22.137	0.869565	168	93.3333	2.21	6.59	1.23	3.9	309.896	34.2	6.03	108.955	11.991	49.5	12.765	20.0112	109.278	90.405	7.3225	134.978	87.4916	FALSE	FALSE	1	1	0	0	0	FALSE	b	1	227
YY012493	LYG	75.0554	M	CT	current	current	22.2137	0.825581	190.667	86.6667	0.69	5.3	1.41	8.277	285.946	17.85	5.55	86.5791	10.93	92.8	33.11	17.6524	74.56	80.9625	6.3025	146.562	70.8221	FALSE	TRUE	1	1	0	0	0	FALSE	b	1	228
YY013209	LYG	75.0418	M	TT	current	no	23.4219	0.955556	186.667	86.6667	0.8	4.48	1.54	3.865	350.878	34.42	5.82	91.9293	4.469	53.8	20.183	24.7046	114.705	90.725	9.1225	158.645	78.7246	FALSE	TRUE	1	1	0	0	0	FALSE	b	0	228
YY012515	LYG	68.8898	M	CT	current	no	24.1683	0.903226	190.667	88	1.96	5.41	1.2	4.583	325.51	12.15	5.26	89.5021	12.543	85.3	30.28	21.1182	98.2125	90.36	9.25	146.835	88.5745	FALSE	FALSE	1	0	0	0	0	FALSE	a	1	229
YY012662	LYG	68.8214	M	CC	current	past	24.0585	0.808081	190.667	97.3333	0.98	4.8	1.02	6.457	501.065	16.92	5.3	75.7661	5.782	71.7	25.258	18.7564	107.03	71.715	5.2925	148.289	78.5913	FALSE	TRUE	1	1	0	0	0	FALSE	a	0	229
YY012523	LYG	64.1643	M	TT	current	current	25.5984	0.916667	240	122	2.28	7.51	1.64	7.897	530.431	20.33	6.73	93.1985	10.639	89.3	23.33	20.787	86.4925	99.6225	6.3725	148.605	86.4868	FALSE	TRUE	1	1	0	0	0	FALSE	a	1	230
YY013181	LYG	64.3039	M	CC	current	current	26.7698	0.948454	159.333	90.6667	1.59	6.45	1.32	4.774	350.604	12.41	5.64	90.4089	10.278	74.6	7.615	22.3913	151.623	94.07	8.595	132.19	79.885	FALSE	FALSE	0	0	0	0	0	FALSE	a	0	230
YY012314	LYG	50.9925	M	CT	current	current	27.5873	0.94	150.667	104.667	2.38	5.02	1.1	3.413	251.29	18.7	5.87	111.691	10.111	94.7	14.627	19.4445	69.61	114.022	6.4725	144.465	87.2734	FALSE	FALSE	0	0	0	0	0	FALSE	b	0	231
YY012567	LYG	51.1431	M	CT	current	current	22.0996	0.918605	174	105.333	0.59	4.85	1.57	8.159	196.646	12.91	4.86	101.554	9.412	74	21.863	19.2406	94.9025	83.0775	7	138.883	90.9083	FALSE	FALSE	1	1	0	0	0	FALSE	b	1	231
YY012605	LYG	52.5969	M	TT	current	current	24.4494	0.903226	152.667	86.6667	1.35	5.06	1.15	3.568	279.878	31.06	4.57	104.088	6.363	63.9	17.11	20.027	94.8325	105.293	7.1675	149.333	87	FALSE	FALSE	1	1	0	0	0	FALSE	b	1	232
YY013082	LYG	52.4271	M	CT	no	no	26.2549	0.914894	183.333	120.667	1.47	6.41	1.38	3.96	443.991	13.11	4.42	93.4304	7.702	86.8	17.761	20.1228	78.6	95.905	8.2475	155.762	102.434	FALSE	TRUE	1	1	0	0	0	FALSE	b	0	232
YY012626	LYG	57.9055	M	CT	no	no	23.4086	0.921348	190	110	1.73	7.15	1.69	10.465	295.923	16.28	6.57	106.174	13.462	92.2	29.982	17.8975	103.175	87.3975	6.55	155.48	94.0171	FALSE	TRUE	1	1	0	0	0	FALSE	a	1	233
YY012648	LYG	57.8015	M	CT	current	current	30.0328	0.94898	173.333	104.667	1.8	5.06	1.41	7.123	447.091	10.19	5.81	103.765	12.147	74.4	13.502	17.524	60.8125	69.58	5.12	144.938	85.3152	FALSE	TRUE	1	1	0	0	0	FALSE	a	0	233
YY012729	LYG	70.8474	M	TT	past	no	19.9113	0.771739	174	98.6667	1.55	5.81	1.7	8.538	337.198	20.99	7.46	92.0675	11.285	72.3	15.63	21.9007	91.6025	80.3875	6.4825	139.333	75.6667	FALSE	TRUE	1	1	0	0	0	FALSE	a	1	234
YY013156	LYG	70.8063	M	CC	current	no	22.2656	0.860465	210	109.333	0.9	7.03	2.27	4.992	521.99	9.59	5.29	93.3092	11.064	57.6	27.389	19.828	108.935	96.505	10.98	145.557	83.4423	FALSE	FALSE	1	1	0	0	0	FALSE	a	0	234
YY012752	LYG	47.5647	M	CT	current	current	22.0501	0.782609	175.333	95.3333	0.88	7.03	2.16	8.512	260.242	16.63	5.78	107.186	11.756	113.1	32.837	20.9047	86.8775	97.2275	8.7975	178.667	102.667	FALSE	FALSE	1	0	0	0	0	FALSE	a	1	235
YY012960	LYG	47.5017	M	CT	no	current	26.533	0.881188	170.667	120	1.05	6.53	1.58	12.026	475.929	9.19	4.77	107.042	7.566	74.5	25.451	22.7785	129.657	107.157	12.795	137.829	92.1975	FALSE	FALSE	0	0	0	0	0	FALSE	a	0	235
YY012609	LYG	65.8207	F	CT	no	no	21.4309	0.9	164	84	2.35	7.34	1.67	7.346	340.303	12.73	5.73	100.693	11.148	57.8	33.795	18.6636	114.255	140.685	7.04	131.146	80.4425	FALSE	FALSE	1	0	0	0	0	FALSE	a	0	236
YY012761	LYG	65.7823	F	TT	no	no	22.9544	0.884211	160.667	87.3333	1.26	7	1.08	7.041	776.193	14.89	12.19	87.3435	4.554	33.1	17.191	21.7226	113.435	88.8225	9.205	147.946	84.7701	FALSE	TRUE	1	0	0	0	0	TRUE	a	1	236
YY012484	LYG	71.2827	F	CC	no	no	24.9896	0.879121	141.333	74	1.17	6.63	1.25	6.025	507.24	14.98	7.66	85.9877	10.92	49.6	13.819	22.7278	143.53	82.4925	9.7825	132.102	75.9454	FALSE	TRUE	1	0	0	0	0	FALSE	b	0	237
YY012771	LYG	71.3046	F	TT	no	no	29.6391	0.961165	162	99.3333	1.85	6.31	1.52	7.021	724.649	18.89	6.56	86.983	10.21	105.8	11.834	24.7909	90.3925	111.42	8.45	160.167	97.7058	FALSE	TRUE	1	1	1	0	0	FALSE	b	1	237
YY012814	LYG	70.7406	F	TT	no	no	20.4444	0.894118	174	71.3333	1.37	6.61	1.9	12.003	726.61	11.45	12.82	90.0957	8.024	69	29.324	20.3164	139.545	84.785	10.51	150.741	76.4617	FALSE	TRUE	1	0	0	0	0	TRUE	a	1	238
YY013154	LYG	70.486	F	CC	no	no	27.3553	0.915789	188	86.6667	0.84	4.42	0.83	10.882	263.712	10.63	5.48	94.7958	6.542	30.1	25.06	20.2395	140.065	95.9575	7.6125	141.496	72.2635	FALSE	FALSE	1	0	0	0	0	FALSE	a	0	238
YY012631	LYG	49.2019	M	TT	current	current	19.4789	0.836957	184	102.667	0.9	6.46	2.32	7.837	311.974	13.58	5.81	110.591	9.925	74.5	42.826	19.6632	97.625	86.1475	7.0475	128.843	81.9824	FALSE	FALSE	0	0	0	0	0	FALSE	b	0	239
YY012902	LYG	48.3066	M	CT	current	current	20.8839	0.873563	180.667	130	1.41	9.12	1.75	10.286	390.99	15.21	3.78	58.6487	14.809	161.5	34.46	21.1681	119.37	82.6825	9.0825	231.333	131.333	FALSE	FALSE	1	1	0	0	0	FALSE	b	1	239
YY012903	LYG	55.3593	M	CC	current	current	21.9532	0.843373	212	110	1.02	5.8	1.7	6.623	298.293	14.54	5.12	100.579	13.104	110.9	14.91	22.0819	96.4575	89.6625	7.415	145.377	88.0186	FALSE	FALSE	0	0	0	0	0	FALSE	b	1	240
YY013110	LYG	55.3018	M	CT	current	current	23.9787	0.840426	185.333	120	0.76	5.8	2	6.981	305.097	14.15	5.1	96.2601	11.973	125	28.351	19.4499	69.2225	92.0475	8.485	146.951	94.0135	FALSE	FALSE	1	1	0	0	0	FALSE	b	0	240
YY012906	LYG	65.4401	F	TT	no	no	21.6364	0.73913	179.333	90.6667	1.48	6.45	1.45	8.045	355.571	11.99	15.1	94.0106	9.562	69.9	18.829	19.1995	114.865	85.4175	9.7925	149.117	86.3637	FALSE	FALSE	1	0	0	0	0	FALSE	a	1	241
YY013086	LYG	65.4319	F	CC	no	no	34.4993	0.954955	180.667	90	2.75	6.49	1.35	8.831	332.817	13.46	5.62	95.8745	0.711	37.5	29.158	21.4875	127.345	121.63	7.4425	141.469	78.3646	FALSE	FALSE	1	1	0	0	0	FALSE	a	0	241
YY012860	LYG	58.412	M	CT	current	current	22.5146	0.932584	182.667	104	0.96	7.96	2.41	7.404	419.584	13.28	5.96	92.839	12.982	91.6	12.007	20.8871	85.09	92.9025	9.14	145.528	85.0976	FALSE	TRUE	1	1	0	0	0	FALSE	a	0	242
YY012981	LYG	58.4203	M	CT	current	no	21.8158	0.850575	160	110.667	1.41	7.13	1.49	5.707	283.955	18.28	5.6	99.3755	10.917	102.5	25.315	20.2613	75.7375	97.7225	8.075	130.369	86.3381	FALSE	FALSE	1	0	0	0	0	FALSE	a	1	242
YY012896	LYG	52.1588	F	CC	no	no	28.7268	0.97	164.667	94.6667	2.27	6.29	1.37	16.464	363.964	10.42	6.43	110.51	9.545	80.4	16.985	18.7268	88.91	159.76	8.545	150.293	88.5228	FALSE	TRUE	1	1	0	0	0	FALSE	a	0	243
YY012989	LYG	52.1396	F	TT	no	no	22.0971	0.770115	160.667	98	0.82	6.15	2.53	8.843	243.484	12.72	4.99	93.288	11.747	73.9	20.227	19.7624	76.855	73.615	5.9725	168	106	FALSE	TRUE	1	0	0	0	0	FALSE	a	1	243
YY012369	LYG	68.4107	F	CT	no	no	24.5603	0.829787	162	93.3333	1.78	6.38	1.09	6.233	565.91	15.03	5.42	84.939	8.499	67.8	23.717	22.9409	119.775	90.95	7.1425	144.209	87.101	FALSE	TRUE	1	1	0	0	0	FALSE	b	0	244
YY013104	LYG	68.2218	F	CC	no	no	20.0956	0.864198	161.333	90	1.36	5.12	1.58	7.811	442.362	12.58	4.35	92.1915	8.525	43.7	20.749	20.0462	68.1175	103.933	4.5275	137.569	86.4926	FALSE	FALSE	1	1	0	0	0	FALSE	b	1	244
YY013130	LYG	56.4244	F	TT	no	no	27.8763	0.950495	162	101.333	1.4	7.08	1.37	4.652	410.338	8.61	4.82	106.705	5.475	53.6	26.214	22.2597	128.335	90.3725	10.8675	135.917	81.2848	FALSE	FALSE	1	1	0	0	0	FALSE	b	1	245
YY013228	LYG	56.4134	F	TT	no	no	27.9421	0.836735	147.333	88	2.43	7.26	1.19	5.527	495.013	13.08	6.13	100.046	12.743	71.4	16.654	17.651	101.47	72.915	7.6975	132.002	78.3105	FALSE	TRUE	1	1	0	0	0	FALSE	b	0	245
YY013095	LYG	68.1478	M	CT	current	current	21.035	0.914634	159.333	83.3333	0.76	4.91	1.06	5.12	377.693	24.23	6.45	82.214	5.004	58.3	29.66	19.0216	70.1125	85.41	10.4475	120.063	69.8807	FALSE	FALSE	0	0	0	0	0	FALSE	a	0	246
YY013164	LYG	68.0137	M	TT	current	past	25.3141	0.896552	186.667	98	0.88	5.19	0.96	3.732	400.621	13.08	3.81	92.0244	7.721	41.2	26.74	24.8981	138.673	92.4925	11.2175	162.543	90.3063	FALSE	TRUE	1	1	0	0	0	FALSE	a	1	246
YY012496	LYG	71.1458	F	TT	no	no	27.268	0.9375	181.333	82	1.24	5.79	1.5	3.73	271.102	18.6	4.79	91.6997	9.741	73.1	10.364	20.0861	91.5225	62.0225	7.11	150.139	78.9868	FALSE	FALSE	1	0	0	0	0	FALSE	b	0	247
YY013168	LYG	70.8063	F	TT	no	no	27.2763	0.851064	180	70	1.15	7.07	1.85	5.928	373.262	14.93	7.12	72.2245	9.373	40.2	15.2	22.3998	139.33	96.4225	11.39	144.851	75.9014	FALSE	FALSE	1	0	0	0	0	FALSE	b	1	247
YY012811	LYG	73.0705	M	TT	current	current	23.8445	0.816327	180.667	100	0.69	6.11	1.52	8.693	459.342	13.32	5.49	89.8726	7.653	72.5	15.24	19.0327	89.86	69.62	7.5825	139.402	83.4204	FALSE	FALSE	1	1	0	0	0	FALSE	b	0	248
YY013234	LYG	73.4237	M	TT	current	no	25.7202	0.956989	161.333	100.667	1.65	5.64	1.16	2.576	333.901	69.1	5.6	82.6733	8.829	76.8	24.086	22.1605	118.375	89.625	10.96	219.333	100.667	FALSE	TRUE	1	0	0	0	0	FALSE	b	1	248
YY012406	LYG	72.4408	F	CT	no	no	28.8095	0.94	150.667	86.6667	1.05	8.68	1.4	10.059	387.625	19.12	6.32	54.5172	11.582	69.1	11.342	21.6715	117.382	73.5	7.46	130.387	77.0387	FALSE	FALSE	1	0	0	0	0	FALSE	b	0	249
YY013244	LYG	72.4928	F	TT	no	past	31.0627	0.990291	170	112	2.35	7.41	1.37	4.685	317.005	14.41	6.25	100.76	11.823	87.6	15.559	22.1326	123.493	86.005	7.7375	175.667	95	FALSE	TRUE	0	1	0	0	0	FALSE	b	1	249
YY013384	LYG	50.4312	F	CT	no	no	23.9017	0.903226	149.333	90	1.37	6.55	1.86	4.813	648.18	10.56	6.95	101.814	9.627	60.3	16.649	20.5584	110.155	106.392	10.915	136.684	81.2504	FALSE	TRUE	0	0	0	0	0	FALSE	a	1	250
YY014215	LYG	50.3956	F	CC	no	past	27.3333	0.863158	164	93.3333	2.02	5.45	1.17	6.08	552.641	10.08	4.91	101.839	8.965	65.8	15.178	19.3445	108.797	97.895	6.8425	155.964	87.6655	FALSE	FALSE	0	0	0	0	0	FALSE	a	0	250
YY013470	LYG	61.2485	F	CT	no	current	24.4353	0.829545	163.333	78.6667	1.22	6.28	1.96	5.483	435.251	9.49	5.91	98.7961	9.642	37.7	11.008	23.1944	123.075	87.37	9.685	143.098	76.9383	FALSE	FALSE	1	0	0	0	0	FALSE	b	1	251
YY014039	LYG	61.2485	F	CC	no	no	28.6215	0.83	190.667	112	1.79	6.44	0.92	4.707	322.832	10.21	5.11	103.224	9.366	57.1	13.464	20.3489	128.4	110.957	9.1325	146.566	86.8801	FALSE	TRUE	1	1	0	1	0	FALSE	b	0	251
YY013524	LYG	56.9719	M	CT	current	no	21.6608	0.793103	204.667	122	1.1	5.61	1.07	4.763	411.414	13.02	4.42	69.1983	6.413	88.3	34.119	24.196	135.805	103.89	11.185	166.958	98.2902	FALSE	FALSE	1	1	0	0	0	FALSE	b	1	252
YY014173	LYG	57.1061	M	CC	past	past	26.7718	0.880435	150.667	111.333	1.42	7.73	1.84	7.242	431.393	11.53	5.91	86.2225	17.604	126.9	12.442	21.2305	106.817	86.395	9.9925	135.441	82.6992	FALSE	TRUE	1	0	0	0	0	FALSE	b	0	252
YY013535	LYG	64.3997	F	CT	no	no	26.9534	0.989583	174.667	83.3333	1.6	5.85	1.13	4.99	271.859	18.44	4.92	98.9365	6.649	58.2	18.481	23.0791	125.18	96.08	7.2975	159.904	75.8162	FALSE	TRUE	1	1	0	0	0	FALSE	a	1	253
YY014063	LYG	64.5311	F	TT	no	past	29.5858	0.867347	160.667	104.667	4.38	7.63	1.37	4.234	301.445	14.98	7.43	96.4223	14.141	115.6	18.789	21.5636	99.73	209.9	9.875	147.317	87.1484	FALSE	FALSE	1	1	0	0	0	FALSE	a	0	253
YY013598	LYG	63.1458	M	CT	past	current	24.6832	0.903226	193.333	92.6667	3.06	9.07	1.72	13.092	366.997	9.34	10.01	102.84	13.477	89.5	24.638	21.6368	119.763	97.25	9.82	136.248	83.3972	FALSE	TRUE	1	0	1	0	0	FALSE	a	1	254
YY014217	LYG	63.2115	M	CT	past	current	25.6744	0.924731	149.333	98.6667	1.3	5.9	2	6.259	387.578	10.77	9.11	91.3458	8.788	111.3	24.836	21.1802	106.695	91.1075	9.2825	126.835	79.0974	FALSE	FALSE	0	0	0	0	0	FALSE	a	0	254
YY013601	LYG	57.4675	F	CC	no	no	26.4988	0.978495	177.333	92	1.49	7.48	1.5	9.022	514.265	8.99	5.52	99.7229	6.407	58.7	17.92	20.1152	138.947	102.123	11.7775	164.921	87.9975	FALSE	FALSE	0	0	0	0	0	FALSE	a	1	255
YY014069	LYG	57.473	F	CC	no	no	23.8054	0.844444	164.667	86.6667	0.81	6.04	1.59	16.913	427.067	10.9	6.55	96.7409	7.121	66.6	18.703	18.695	100.088	100.317	10.89	144.191	79.048	FALSE	TRUE	1	0	0	0	0	FALSE	a	0	255
YY013732	LYG	64.0903	M	TT	current	current	20.1018	0.8	210.667	80.6667	0.8	5.3	1.49	4.433	351.942	46.04	5.07	77.9038	5.301	81	28.71	21.6879	102.23	93.48	9.6175	150.864	73.0109	FALSE	TRUE	1	1	0	0	0	FALSE	a	1	256
YY013951	LYG	64.0055	M	TT	current	current	20.7612	0.777778	195.333	82.6667	1.06	6.11	1.55	4.506	367.632	18.41	5.05	92.9883	4.802	63.4	26.524	22.1171	144.713	98.2475	9.745	132.974	76.9209	FALSE	FALSE	1	1	0	0	0	FALSE	a	0	256
YY013880	LYG	53.1691	M	CT	current	current	23.259	0.923077	159.333	82.6667	0.67	5.5	1.83	4.503	306.814	13.65	4.61	103.796	6.361	100.9	10.999	22.1419	121.11	101.013	11.8675	141.365	88.2117	FALSE	FALSE	1	1	0	0	0	FALSE	b	1	257
YY014421	LYG	53.1855	M	CT	current	current	22.4549	0.777778	159.333	90	0.67	5.75	1.25	5.662	343.586	13.12	5.26	97.9077	7.211	67.5	23.158	20.3994	127.125	82.04	9.32	134.843	83.7441	FALSE	FALSE	0	0	0	0	0	FALSE	b	0	257
YY013898	LYG	62.1903	F	TT	no	no	27.7473	0.929293	166	98.6667	3.37	8.19	1.43	4.712	278.28	27.64	5.9	96.8182	9.537	62.7	12.929	22.5199	99.84	87.1275	7.61	140.087	81.8397	FALSE	FALSE	1	1	0	0	0	FALSE	a	0	258
YY013917	LYG	62.2861	F	TT	no	no	31.8472	0.940594	162.667	115.333	1.97	6	1.58	7.997	305.831	10.92	5.5	97.2865	9.288	60.3	17.759	22.8821	148.385	83.9225	8.8575	134.221	89.5404	FALSE	FALSE	1	0	0	0	0	FALSE	a	1	258
YY013996	LYG	72.4901	M	CC	current	current	24.2215	0.944444	158.667	80	1.08	7.75	1.42	10.19	556.628	11.51	5.65	81.7472	10.051	111.8	17.561	23.1806	99.5125	92.0225	10.865	138.669	83.4597	FALSE	FALSE	1	1	0	0	0	FALSE	b	0	259
YY014002	LYG	72.2601	M	CT	current	current	19.9481	0.878049	160.667	90.6667	0.5	5.57	2.04	6.535	413.355	14.21	6.02	93.9288	7.565	124.4	14.907	22.275	122.763	112.362	11.4275	160.667	83	FALSE	FALSE	0	1	0	0	0	FALSE	b	1	259
YY013950	LYG	69.3854	M	CT	past	no	24.6097	0.913043	191.333	90	0.9	5.8	1.73	4.73	258.436	19.22	5.08	89.8423	6.015	74.1	28.663	22.6887	94.3625	123.653	10.375	158.528	83.3815	FALSE	FALSE	1	1	0	0	0	FALSE	a	0	260
YY014008	LYG	69.3142	M	TT	current	no	22.3081	0.823529	210.667	120	1.18	5.63	1.45	4.581	242.139	42.66	6.49	95.3905	3.934	61.9	7.62	22.6907	116.722	94.3825	9.925	161.8	90.3779	FALSE	TRUE	1	1	0	0	0	FALSE	a	1	260
YY013867	LYG	66.5955	F	CT	no	no	25.7773	0.956989	189.333	89.3333	1.72	6.94	1.5	7.894	414.997	11.94	6.81	86.3541	7.966	67.7	20.617	20.0482	111.963	81.895	9.14	154.54	76.4774	FALSE	FALSE	1	1	0	0	0	FALSE	b	0	261
YY014050	LYG	66.5927	F	CT	no	no	23.0518	0.882979	210.667	108.667	1.42	6.52	1.73	11.501	539.519	10.65	7.21	92.7053	6.63	66.5	9.229	24.5223	120.308	104.73	9.28	171.381	77.4325	FALSE	TRUE	1	1	0	0	0	FALSE	b	1	261
YY014055	LYG	57.9439	M	CT	current	no	24.1672	0.954545	182	120.667	2.69	5.65	0.93	5.261	331.338	17	4.4	99.1767	11.59	140.4	15.564	21.7714	123.24	106.98	8.6725	147.488	95.4604	FALSE	TRUE	1	1	0	0	0	FALSE	b	1	262
YY014096	LYG	57.8261	M	CT	no	past	23.9512	0.847826	177.333	100.667	2.73	6.95	1.48	5.27	303.479	17.1	4.21	110.593	4.185	85.4	26.333	20.3101	111.582	111.7	11.365	131.592	76.9488	FALSE	TRUE	1	1	0	0	0	FALSE	b	0	262
YY013510	LYG	57.5989	F	TT	no	no	24.773	0.944444	195.333	98.6667	NA	NA	NA	NA	NA	NA	NA	NA	10.719	84.3	30.007	22.1525	111.16	89.79	11.335	166.829	83.1208	FALSE	TRUE	1	0	0	0	0	FALSE	a	0	263
YY014061	LYG	57.7331	F	CT	no	no	30.582	0.792453	186.667	96.6667	1.84	5.5	0.97	16.705	209.063	36.35	5.25	97.044	9.931	58	20.521	20.8399	104.61	70.585	7.6775	172.221	102.332	FALSE	FALSE	1	1	0	0	0	FALSE	a	1	263
YY014081	LYG	48.5421	M	TT	current	current	24.2813	0.886364	167.333	101.333	0.75	6.54	1.57	6.047	331.861	28.7	4.81	79.9406	6.021	109.5	14.018	20.46	101.33	100.54	9.235	154.145	95.7136	FALSE	FALSE	1	0	0	0	0	FALSE	a	1	264
YY014328	LYG	49.0459	M	CT	current	current	29.3776	0.971154	140.667	99.3333	3.04	6.5	1.37	7.913	399.012	12.41	7.58	100.061	13.282	105.1	18.785	20.3143	73.35	112.425	9.6275	127.399	81.8391	TRUE	TRUE	1	0	1	0	0	TRUE	a	0	264
YY013797	LYG	50.1602	F	TT	no	no	28.7862	0.960784	147.333	79.3333	1.72	7.71	1.58	13.569	381.217	10.25	5	105.038	13.012	69.4	15.496	21.6963	113.705	85.5375	8.0075	125.101	77.3905	FALSE	FALSE	0	0	0	0	0	FALSE	b	0	265
YY014134	LYG	50.0479	F	CT	no	no	27.2763	0.829545	152.667	77.3333	1.41	5.21	1.42	7.915	531.309	11.14	4.79	96.9986	8.915	49.8	12.188	21.5406	126.903	93.39	8.5425	138.875	84.3606	FALSE	TRUE	1	1	0	0	0	FALSE	b	1	265
YY013762	LYG	63.7618	M	TT	current	current	26.51	0.546392	153.333	88.6667	1.8	6.66	2.58	7.736	388.632	33.06	6.11	97.3062	12.745	145.8	19.984	21.3293	81.405	99.7475	10.1625	121.736	74.4481	FALSE	FALSE	0	1	0	0	0	FALSE	a	0	266
YY014194	LYG	63.8549	M	CT	current	current	19.7927	0.845238	209.333	111.333	1.53	7.34	2.42	12.131	1006.9	11.91	8.97	99.6417	11.914	83.2	18.064	19.8693	107.457	84.91	8.9275	179.333	91.3333	FALSE	FALSE	1	0	0	1	0	FALSE	a	1	266
YY013800	LYG	63.5674	M	TT	current	past	22.6239	0.844444	159.333	74.6667	1.43	6.13	1.84	4.044	296.204	18.68	6.5	91.9997	6.848	92.7	10.572	23.3854	126.385	90.665	8.87	144.954	71.9363	FALSE	FALSE	1	0	0	0	0	FALSE	b	0	267
YY014213	LYG	63.5127	M	TT	no	current	27.321	0.922222	186	110	1.74	8.69	2.15	4.019	398.01	13.76	5.85	89.1676	16.554	93.7	20.881	20.2933	98.645	139.065	10.8175	142.146	89.2553	FALSE	TRUE	1	1	0	0	0	FALSE	b	1	267
YY014253	LYG	60.8597	F	CT	no	no	23.0623	0.875	170.667	96.6667	1.43	5.49	1.12	6.744	342.596	9.67	5.74	94.5182	10.233	72.7	14.268	22.3837	104.775	97.035	11.6175	143.345	82.7546	FALSE	TRUE	1	1	0	0	0	FALSE	b	1	268
YY014395	LYG	60.8515	F	CT	no	no	26.4792	0.806122	159.333	90	1.1	4.16	1.69	7.95	285.392	12.78	4.22	82.6727	7.715	61.3	13.647	20.4683	97.625	89.555	8.63	132.828	80.254	FALSE	FALSE	0	1	0	0	0	FALSE	b	0	268
YY013490	LYG	56.334	F	TT	no	no	22.3945	0.793478	178	96	1.05	5.85	1.33	8.762	619.994	11.21	5.34	97.7321	6.438	40.8	5.206	22.2531	120.823	81.3425	10.0825	128.681	78.8272	FALSE	TRUE	1	0	0	0	0	FALSE	b	0	269
YY014270	LYG	56.3285	F	CT	no	no	24.3794	0.888889	156.667	94.6667	1.4	4.83	1.8	5.119	315	12.22	4.6	69.2926	8.844	53.4	22.255	19.8481	80.9625	70.71	8.4075	145.473	90.6471	FALSE	TRUE	1	1	0	0	0	FALSE	b	1	269
YY013726	LYG	58.7214	M	TT	current	current	18.8707	0.829268	161.333	100	0.67	5.03	1.65	4.485	409.885	22.77	3.66	95.6533	5.13	84.1	15.813	21.1857	158.135	106.49	8.5175	133.567	79.5397	FALSE	FALSE	1	0	0	0	0	FALSE	a	0	270
YY014277	LYG	58.642	M	CC	current	current	28.5656	0.873684	163.333	103.333	2.29	6.42	1.19	4.188	407.076	15.46	5.62	92.1326	9.823	81	23.097	22.0181	102.35	97.55	8.4075	135.062	92.2648	FALSE	TRUE	1	1	0	0	0	FALSE	a	1	270
YY013963	LYG	72.0055	M	TT	no	no	22.984	0.939024	250.667	90	2.56	7.12	1.22	4.855	390.99	32.93	6.24	96.0283	6.275	80.7	13.822	21.9047	125.388	91.8925	7.3525	166.279	76.0649	FALSE	FALSE	1	1	0	0	0	FALSE	b	0	271
YY014286	LYG	72.3231	M	CT	past	no	27.0329	0.953488	159.333	90	0.5	6.14	2.42	6.337	734.536	13.88	5.07	89.6483	9.946	52.7	14.64	20.6855	109.565	80.5675	8.9675	131.331	78.1872	FALSE	FALSE	1	0	0	0	0	FALSE	b	1	271
YY014042	LYG	50.8419	F	CT	no	no	25.8065	0.8125	169.333	90	2.09	5.99	1.55	6.422	424.21	10.85	5.54	105.889	6.491	63.1	16.932	21.0287	141.327	91.8225	9.6025	141.262	76.2602	FALSE	FALSE	0	0	0	0	0	FALSE	b	0	272
YY014303	LYG	50.8611	F	CT	no	no	24.3985	0.849462	216.667	138	1.94	5.28	1.57	7.434	295.866	16.94	6.91	98.6787	8.666	40.9	14.059	20.6302	101.267	60.11	6.225	164.288	106.311	FALSE	FALSE	1	1	0	0	0	FALSE	b	1	272
YY013957	LYG	66.3272	F	CT	no	no	21.8577	0.842697	170.667	85.3333	1.77	6.35	1.21	9.388	436.149	14.98	16.78	94.7979	9.548	68.9	12.074	18.8921	125.095	114.653	10.255	139.304	78.5361	FALSE	FALSE	1	1	0	0	0	FALSE	b	0	273
YY014306	LYG	66.2177	F	CT	no	no	22.83	0.921348	221.333	99.3333	1.27	5.79	2.4	9.551	269.778	16.98	4.58	67.9548	9.482	63.8	23.126	22.2864	105.48	107.67	8.61	146.608	75.3021	FALSE	FALSE	1	1	0	0	0	FALSE	b	1	273
YY014464	LYG	67.6112	F	CC	no	no	32.0291	0.95283	142.667	80.6667	1.97	7.3	1.12	7.116	637.565	12.37	6.74	96.0184	9.882	66.7	15.993	18.9575	101.248	93.8275	9.615	164	90	FALSE	TRUE	1	1	0	0	0	FALSE	b	1	274
YY015044	LYG	67.5428	F	CT	no	no	25.4059	0.947917	154.667	100	1.41	6.04	1.24	6.97	374.302	10.33	5.49	83.2584	12.353	67	27.233	22.8888	104.72	92.9425	10.4075	144.437	87.3452	FALSE	FALSE	1	1	0	0	0	FALSE	b	0	274
YY014468	LYG	51.5975	F	TT	no	no	26.4898	0.892473	138.667	86.6667	2.57	6.74	0.86	6.866	645.469	11.07	11.98	127.912	17.397	56.1	19.319	19.8665	152.183	106.705	11.8475	134.613	79.7511	FALSE	FALSE	1	0	1	0	0	FALSE	b	1	275
YY014595	LYG	51.6468	F	TT	no	no	27.7639	0.933333	170	120.667	1.39	6.31	1.26	5.419	315.999	25.81	4.97	81.1368	9.143	53.6	10.345	22.4561	113.332	108.31	9.5275	143.285	90.7438	FALSE	TRUE	1	0	0	0	0	FALSE	b	0	275
YY014466	LYG	61.9192	F	TT	no	current	23.7812	0.967033	190	114.667	1.6	5.71	1.66	5.886	458.753	13.95	7.36	76.3667	10.363	113.5	14.71	17.1743	124.293	91.7175	10.5325	138.259	80.9986	FALSE	FALSE	1	0	0	0	0	FALSE	b	0	276
YY014532	LYG	61.8563	F	CT	no	no	27.0552	0.923913	194.667	106.667	1.55	6.8	1.29	11.751	457.266	9.67	5.85	83.1155	7.876	71.2	14.797	22.8986	105.565	97.255	9.045	153.167	84.7693	FALSE	FALSE	1	0	0	0	0	FALSE	b	1	276
YY014544	LYG	65.5305	F	CT	current	current	40.5827	0.895161	190.667	111.333	2.52	8.22	1.14	3.853	466.619	10.9	6.09	93.2368	11.42	64.7	19.453	21.8522	111.12	103.507	9.57	181.952	100.633	FALSE	TRUE	1	1	0	0	0	FALSE	b	1	277
YY015233	LYG	65.5222	F	TT	no	no	22.3648	0.9	160.667	88.6667	0.94	4.91	1.39	5.373	298.867	14.09	5.15	91.4226	9.199	66.3	7.948	21.5849	101.485	84.5375	8.3125	124.109	75.2037	FALSE	FALSE	0	0	0	0	0	FALSE	b	0	277
YY014525	LYG	69.5387	F	CC	no	no	26.9357	0.79	206.667	101.333	2.53	7.52	0.89	4.788	527.194	10.62	5.69	98.0972	10.581	87.6	11.794	20.8763	110.862	107.77	11.85	161.967	84.0289	FALSE	TRUE	1	1	0	0	0	FALSE	a	0	278
YY014545	LYG	69.9055	F	TT	no	no	26.0407	0.9	189.333	116.667	2	7.2	1.31	4.066	387.949	30.42	6.02	86.3223	11.016	60.3	7.943	22.8632	140.958	118.675	10.795	151.795	94.3673	FALSE	FALSE	1	1	0	0	0	FALSE	a	1	278
YY014571	LYG	54.3217	M	CC	current	current	28.306	0.949495	158.667	91.3333	2.99	6.42	1.28	6.997	486.162	13.08	5.98	105.099	7.845	80.5	12.898	22.0308	106.332	135.653	8.89	138.331	85.8139	FALSE	FALSE	0	0	0	0	0	FALSE	b	1	279
YY015185	LYG	54.4175	M	CC	current	no	28.5694	0.95	160.667	116.667	0.93	5.47	1.16	10.322	448.333	12.4	6.1	94.6234	13.285	106.5	10.506	24.3451	84.42	99.9075	9.8925	143.988	89.1039	FALSE	FALSE	1	1	0	0	0	FALSE	b	0	279
YY014575	LYG	57.3142	M	CT	current	no	28.056	0.904255	194	92	1.78	4.47	0.64	2.894	412.054	15.07	4.95	91.3472	7.538	52	17.301	20.3682	99.8775	113.263	10.105	145.376	90.499	FALSE	FALSE	1	1	0	0	0	FALSE	a	1	280
YY014706	LYG	57.232	M	TT	current	current	26.1066	0.880435	154	90.6667	1.27	7.39	1.66	10.966	396.137	12.7	5.46	90.7282	7.512	74	18.17	21.6309	119.935	85.69	9.5425	141.294	81.9073	FALSE	FALSE	1	1	0	0	0	FALSE	a	0	280
YY014602	LYG	67.3374	M	CT	current	current	25.3515	1.01124	181.333	101.333	1.56	7.3	1.36	5.06	359.374	17.35	6.19	85.0109	6.885	91	24.701	21.1336	91.975	89.735	10.69	155.533	99.3103	FALSE	FALSE	1	1	0	0	0	FALSE	a	1	281
YY014655	LYG	67.2991	M	TT	current	no	24.4975	0.860465	208	98	1.3	6.22	1.29	2.826	207.643	57.7	5.9	85.4123	6.602	49.6	22.012	19.3486	112.192	83.0925	7.3525	170.839	85.4324	FALSE	TRUE	1	1	0	0	0	FALSE	a	0	281
YY014625	LYG	61.5797	F	CT	no	no	25.2801	0.866667	167.333	92	2.06	7.6	1.28	5.831	479.434	13.57	5.13	67.0816	12.207	97.6	17.367	NA	NA	NA	NA	138.603	80.7036	FALSE	TRUE	1	0	0	0	0	FALSE	a	1	282
YY015238	LYG	61.4456	F	TT	no	no	32.023	0.821429	164.667	80.6667	1.16	4.73	1.31	5.865	268.957	33.6	5.98	72.3925	7.929	70	9.292	21.6839	110.688	91.465	7.18	139.245	82.2132	FALSE	TRUE	1	1	0	0	0	FALSE	a	0	282
YY014634	LYG	58.2697	M	CT	past	current	22.0181	0.811765	219.333	120	1.26	7.53	2.31	9.607	481.724	9.66	5.16	107.337	12.23	90.2	22.889	22.2808	112.347	102.093	8.915	143.332	90.939	FALSE	TRUE	1	1	0	0	0	FALSE	a	1	283
YY014784	LYG	58.2259	M	CT	past	current	26.1752	0.946237	163.333	100	1.18	4.76	1.01	8.353	427.492	13.7	5.73	102.783	6.794	54.7	15.755	22.757	104.905	93.885	10.2175	141.164	93.0307	FALSE	TRUE	1	0	0	0	0	FALSE	a	0	283
YY014671	LYG	66.193	F	CT	no	no	25.7531	0.9375	243.333	108.667	1.83	6.33	1.36	6.346	331.846	12.98	5.3	91.2932	11.114	48.8	9.712	19.6881	100.26	75.8125	6.665	166.667	87.3333	FALSE	TRUE	1	1	0	0	1	FALSE	a	1	284
YY015098	LYG	66.2478	F	TT	no	no	22.5801	0.925926	158.667	91.3333	1.51	5.32	1.35	3.769	313.045	11.3	5.94	95.3266	11.017	101.6	12.922	18.9551	89.4975	106.588	9.67	123.465	73.1629	FALSE	TRUE	1	1	0	0	0	FALSE	a	0	284
YY014722	LYG	60.8159	M	CT	current	current	25.8876	0.957143	229.333	110.667	1.55	5.65	1.67	3.975	406.424	15.89	6.31	101.325	8.069	62.7	21.482	20.1561	105.06	67.175	8.895	156.667	96.6667	FALSE	TRUE	0	0	0	0	0	FALSE	b	1	285
YY014896	LYG	60.835	M	CC	current	current	25.8166	0.884211	170.667	100.667	1.48	5.83	1.43	10.276	476.555	11.96	6.46	79.8135	4.444	106.4	20.219	20.1572	97.115	82.4	10.855	138.182	87.8343	FALSE	FALSE	1	0	0	0	0	FALSE	b	0	285
YY014452	LYG	68.4298	F	CC	past	current	24.136	0.802198	168	89.3333	1.32	7.09	1.81	11.732	585.652	9.04	6.21	89.0423	10.773	70	15.076	21.1658	116.278	89.5475	9.7	138.683	85.1559	FALSE	FALSE	0	0	0	0	0	FALSE	a	0	286
YY014908	LYG	68.5284	F	CT	no	no	23.9805	0.880952	248	117.333	1.52	7.67	1.82	5.635	528.774	16.33	5.87	70.0988	13.085	108.4	20.974	22.0499	141.87	95.1625	12.3525	174.987	100.345	FALSE	TRUE	1	1	0	0	0	FALSE	a	1	286
YY014902	LYG	57.87	M	TT	current	current	21.5405	0.847059	239.333	110	1.07	5.54	2.01	5.871	622.215	10.81	8.99	94.8385	17.956	113.1	20.568	21.7933	95.92	104.405	11.31	163.555	94.5897	FALSE	TRUE	1	1	0	0	0	FALSE	a	0	287
YY014936	LYG	58.1848	M	CT	no	current	27.9007	0.894737	149.333	96	0.97	5.29	1.56	7.624	307.586	11.08	8.55	87.7934	7.438	109.5	19.187	19.797	81.8775	89.45	9.6675	125.008	85.2794	FALSE	TRUE	1	1	0	0	0	FALSE	a	1	287
YY014952	LYG	67.0363	F	TT	current	past	20.6612	0.819277	181.333	92	0.81	5.79	1.8	7.412	432.577	11.74	5.34	76.1938	9.641	73.4	25.498	23.7803	127.043	93.2125	13.2825	155.66	92.3272	FALSE	TRUE	1	1	0	0	0	FALSE	b	1	288
YY014953	LYG	67.0801	F	CC	no	no	30.8615	0.933333	167.333	112	1.03	7.53	1.46	9.182	368.25	11.06	5.44	84.3057	0.544	52.6	15.881	22.4563	106.615	100.463	10.3175	146.754	87.4121	FALSE	TRUE	1	1	0	0	0	FALSE	b	0	288
YY015025	LYG	55.3539	M	TT	past	current	22.6368	0.917647	120.667	88.6667	1.78	4.86	1.24	6.901	812.672	10.18	5.54	71.7543	9.138	93.4	21.328	23.5976	117.35	84.385	11.2125	140.391	87.5627	FALSE	TRUE	1	0	0	0	0	FALSE	a	0	289
YY015144	LYG	55.5483	M	CT	current	current	24.7007	0.902174	166.667	98.6667	1.63	3.99	1.64	6.462	290.376	12.24	5.4	101.706	9.085	125.3	20.46	23.5535	84.9975	100.963	8.52	139.44	89.7755	FALSE	FALSE	1	1	0	0	0	FALSE	a	1	289
YY015090	LYG	73.7413	M	CC	current	current	20.4341	0.827586	148.667	80.6667	1.19	6.4	1.38	4.045	361.993	18.59	5.26	61.6534	9.953	117.1	18.302	24.232	99.425	90.185	9.9175	141.376	80.5589	FALSE	TRUE	1	1	0	0	0	FALSE	a	0	290
YY015190	LYG	73.7276	M	CT	current	current	22.8936	0.882979	168.667	84	1.29	6.13	0.98	9.419	320.889	14.7	7.99	88.5074	13.202	145.5	20.713	19.4016	81.65	99.8575	11.6775	149.05	83.0909	FALSE	TRUE	1	0	0	0	0	FALSE	a	1	290
YY014986	LYG	64.0411	F	CC	no	no	26.6856	0.836735	200	81.3333	3.14	7.02	1.17	9.068	398.548	9.84	5.35	83.1808	13.17	126.5	17.299	19.646	83.38	96.855	8.73	144.8	76.7646	FALSE	TRUE	1	1	0	0	0	FALSE	a	0	291
YY015229	LYG	64.0219	F	CT	no	no	22.9189	0.857143	169.333	86.6667	1.87	5.1	1.12	4.581	501.693	11.31	5.05	89.7919	10.207	88.6	8.52	22.1912	106.463	103.282	9.95	137.266	81.2679	FALSE	TRUE	1	1	0	0	0	FALSE	a	1	291
YY014783	LYG	56.0712	M	CT	current	current	24.0588	0.885417	160.667	99.3333	3.96	10.77	2.28	4.304	403.831	12.28	9.37	83.3168	9.214	106.1	11.195	21.3285	92.48	94.0925	12.855	143.521	87.8658	FALSE	TRUE	1	0	0	1	0	FALSE	a	0	292
YY015272	LYG	56.1123	M	CC	current	current	21.2953	0.833333	211.333	122	0.92	3.91	1.75	5.094	439.086	8.34	8.95	105.986	9.405	99.1	17.728	21.0373	108.325	80.75	7.93	161.333	116	FALSE	FALSE	1	1	0	0	0	FALSE	a	1	292
YY015332	LYG	47.0691	F	TT	no	no	24.6094	0.826531	223.333	154	0.95	5.3	1.57	9.235	600.875	9.01	4.96	87.2196	9.204	58.1	13.919	19.7766	95.8725	80.08	9.705	171.679	120.47	FALSE	TRUE	1	0	0	1	0	FALSE	a	1	293
YY015463	LYG	46.8884	F	CC	no	no	32.4779	0.824074	209.333	150.667	1.24	5.57	1.07	9.016	547.34	9.07	5.78	102.656	11.584	72.5	17.91	19.0561	112.588	103.293	8.8525	140.696	93.1571	FALSE	TRUE	1	1	0	0	0	FALSE	a	0	293
YY015344	LYG	54.8227	M	TT	no	no	28.5595	0.95098	190	124.667	1.33	5.47	1.16	3.609	402.423	44.29	4.91	80.2128	10.51	107.6	20.432	22.1048	103.862	103.552	12.2075	160.408	103.276	FALSE	TRUE	1	1	0	1	0	FALSE	a	1	294
YY015861	LYG	54.9733	M	CT	current	no	25.1543	0.882979	160	90	1.46	6.05	1.39	8.088	789.746	11.29	5.41	100.384	11.153	40.3	22.663	19.3365	70.73	89.1775	6.7	139.039	76.7562	FALSE	FALSE	1	1	0	0	0	FALSE	a	0	294
YY015442	LYG	65.2266	F	TT	no	no	27.9577	1.02105	160.667	97.3333	2.4	7.59	1.18	4.985	474.475	21.08	5.13	74.2429	11.787	77.2	13.034	23.1301	127.373	98.15	13.01	135.359	79.9692	FALSE	TRUE	0	0	0	0	0	FALSE	b	1	295
YY015709	LYG	65.1499	F	CT	no	no	23.9721	0.869565	204.667	112	1.31	5.81	1.2	8.715	491.696	9.91	6.35	83.2863	7.166	89.2	12.916	20.3304	94.6225	101.795	10.5075	160.979	91.0298	FALSE	TRUE	1	0	0	0	0	FALSE	b	0	295
YY015334	LYG	72.4134	M	CC	current	no	21.9354	0.930233	169.333	118.667	1.55	4.31	1.05	3.75	428.448	11.25	5.28	87.121	8.697	90.5	17.688	23.4972	117.495	111.135	10.1725	140.005	87.8869	FALSE	FALSE	1	1	0	0	0	FALSE	a	0	296
YY015457	LYG	73.0897	M	CT	current	no	28.0237	0.989796	186	99.3333	2	6.27	1.23	4.06	535.497	27.97	4.48	59.0759	8.574	93.1	10.628	22.6031	94.365	109.355	9.96	144.667	86	FALSE	TRUE	1	1	0	0	0	FALSE	a	1	296
YY015511	LYG	60.0082	F	CT	no	past	31.0482	0.918182	176.667	102	0.89	5.36	1.45	5.406	467.265	8.53	6.57	100.428	8.916	48.5	12.1	19.3602	92.8975	87.12	7.74	151.94	93.1351	FALSE	TRUE	1	1	0	0	0	FALSE	b	1	297
YY015848	LYG	60.1095	F	TT	no	no	28.1625	0.916667	162	98	2.96	6.88	1.07	6.844	537.508	9.77	5.77	91.2406	7.538	63	20.454	21.6236	89.475	111.865	10.18	138.113	83.6457	FALSE	TRUE	1	1	0	0	0	FALSE	b	0	297
YY015502	LYG	45.9822	M	CT	no	current	24.794	0.880435	147.333	96	1.29	7.22	2.01	7.467	382.189	10.76	6.23	105.304	11.913	112.5	20.581	21.7756	94.055	88.6725	10.76	133.548	82.7025	FALSE	FALSE	0	0	0	0	0	FALSE	a	0	298
YY015519	LYG	46.1875	M	CC	current	current	27.5087	0.969388	242.667	74	2.58	9.76	1.8	4.839	617.37	14.21	5.95	96.4843	6.275	94.2	14.74	22.3373	102.725	126.115	14.6475	142.741	104.462	FALSE	FALSE	1	1	0	0	0	FALSE	a	1	298
YY015468	LYG	59.332	M	CT	no	current	22.0985	0.852632	188.667	120	0.84	5.71	1.89	5.574	577.472	10.27	5.68	91.1394	15.902	136.3	35.735	19.5242	108.207	96.705	12.095	144.479	88.0135	FALSE	TRUE	1	1	0	0	0	FALSE	a	0	299
YY015532	LYG	59.2909	M	CC	no	no	25.8409	0.934783	205.333	104.667	0.95	7.08	1.38	11.533	852.562	8.04	17.69	95.1671	9.67	122.3	24.708	19.4474	116.595	108.985	13.34	167.502	101.618	FALSE	TRUE	1	1	0	0	0	FALSE	a	1	299
YY015611	LYG	54.8802	M	CT	current	current	23.1463	0.818182	172.667	108	1.86	6.63	1.71	2.636	452.424	25.11	5.64	90.5062	10.608	116.2	26.955	21.0455	94.92	88.475	12.7625	156.667	106.667	FALSE	FALSE	1	1	0	0	0	FALSE	a	1	300
YY015959	LYG	55.154	M	CT	no	no	24.4956	0.965909	179.333	94	2.25	5.86	1.24	9.793	346.294	11.82	6.01	101.44	9.386	74.1	22.207	21.5493	112.748	112.35	12.135	144.937	87.9388	FALSE	FALSE	1	0	0	0	0	FALSE	a	0	300
YY015614	LYG	54.1191	M	CC	past	past	28.4276	0.979592	191.333	120	1.84	6.22	0.92	5.908	787.418	13.22	5.79	79.5669	5.275	76.1	29.966	20.0562	110.198	99.1625	12.3575	155.92	100.933	FALSE	TRUE	1	1	0	0	0	FALSE	b	1	301
YY016146	LYG	54.1903	M	CT	current	no	26.2857	0.912621	190	119.333	1.24	4.26	1.25	7.253	622.796	13.14	5.03	74.6629	9.727	146.4	13.904	21.8897	71.4625	123.787	10.5175	136.745	89.6929	FALSE	TRUE	1	0	0	0	0	FALSE	b	0	301
YY015668	LYG	60.4381	M	CT	current	current	25.2347	0.934783	164	99.3333	1.6	6.12	1.06	5.327	638.633	11.02	4.97	84.2278	5.566	87.8	18.349	23.855	77.4825	96.9725	10.175	141.333	93	FALSE	FALSE	0	0	0	0	0	FALSE	a	0	302
YY015674	LYG	60.46	M	CC	current	no	24.0569	1.0641	171.333	120.667	1.28	4.98	1.23	6.09	393.703	9.34	5.13	92.5921	7.324	72.8	17.767	23.8023	109.612	92.69	8.175	126.225	84.8195	FALSE	FALSE	1	1	0	0	0	FALSE	a	1	302
YY015338	LYG	61.9658	M	CC	current	current	21.9899	0.833333	169.333	93.3333	1.43	6.9	1.96	9.318	595.006	9.22	5.92	95.0799	10.461	123.8	10.155	21.4862	93.575	100.95	12.0075	143.769	84.97	FALSE	FALSE	1	0	0	0	0	FALSE	b	0	303
YY015760	LYG	61.7906	M	TT	current	past	26.7679	0.836735	141.333	90.6667	1.42	6.57	1.56	7.357	491.398	16.97	3.76	65.2826	13.672	135	33.595	23.3326	86.6975	125.532	10.9925	132.932	85.0883	FALSE	TRUE	1	1	0	0	0	FALSE	b	1	303
YY015679	LYG	60.6598	F	CT	no	no	24.2286	0.813953	152	82.6667	1.55	6.18	1.39	4.682	510.142	10.36	7.3	94.4961	7.66	56.3	8.718	19.601	96.8075	97.825	9.905	125.783	74.6365	FALSE	TRUE	0	0	1	0	0	FALSE	a	0	304
YY015772	LYG	60.6516	F	CT	no	no	26.3591	0.880435	160.667	98.6667	1.07	4.79	1.07	7.5	782.846	14.36	5.07	61.0965	7.117	80.3	10.65	18.9748	100.907	77.375	8.66	144.261	86.8393	FALSE	TRUE	1	1	0	0	0	FALSE	a	1	304
YY015499	LYG	71.1403	M	TT	current	past	21.9358	0.869565	161.333	93.3333	1.34	7.43	1.48	3.361	427.272	90.98	4.93	52.8769	6.034	119.1	6.295	23.3075	98.19	81.48	11.03	151.715	85.0878	FALSE	FALSE	1	0	0	0	0	FALSE	b	0	305
YY015797	LYG	71.1513	M	TT	current	no	19.35	0.831325	199.333	89.3333	1.1	4.65	1.14	3.822	569.871	29.31	6.71	90.7115	7.012	73.6	27.58	22.7247	91.6125	79.02	9.93	158.667	84	FALSE	FALSE	1	1	0	0	0	FALSE	b	1	305
YY015347	LYG	66.3217	M	TT	current	no	25.2826	0.9	232	119.333	0.84	5.33	1.84	3.161	317.451	31.47	4.6	82.3232	9.92	81	16.105	NA	NA	NA	NA	145.293	95.6174	TRUE	TRUE	0	0	0	0	0	FALSE	a	0	306
YY015909	LYG	66.245	M	CT	current	current	21.9645	0.988506	190.667	87.3333	0.88	5.23	1.62	7.132	492.509	9.37	4.57	92.0544	6.354	102.8	11.402	22.9001	89.08	91.4725	6.9125	148.62	84.9268	FALSE	TRUE	1	0	0	1	0	FALSE	a	1	306
YY015824	LYG	73.692	M	CC	current	current	22.7094	0.858824	164.667	82.6667	1.18	5.38	1.64	4.336	465.157	12.57	6.85	78.9596	10.854	119.8	18.12	20.8192	83.465	96.2475	10.6425	134.46	78.2549	FALSE	TRUE	1	1	0	0	0	FALSE	a	0	307
YY015931	LYG	73.6318	M	CT	current	current	17.9931	0.929412	178.667	84.6667	0.78	4.71	1.54	6.207	584.272	11.81	5.15	80.8557	7.406	40.2	22.795	22.1551	74.05	61.5775	9.875	138.667	84.6667	FALSE	FALSE	0	1	0	0	0	FALSE	a	1	307
YY015987	LYG	69.2539	M	CC	current	no	30.6228	1.03093	192.667	80	0.99	4.74	1.33	4.418	520.513	9.44	7.03	95.0598	12.034	71.1	24.133	21.2813	90.2925	104.392	12.12	170.118	77.4189	FALSE	TRUE	1	1	1	0	0	FALSE	b	1	308
YY016094	LYG	69.2238	M	CT	current	current	23.2677	0.854369	206.667	84	1.66	5.35	1.23	9.699	422.085	12.56	5.32	71.6497	9.643	122.4	22.197	20.7081	105.657	104.5	12.0725	151.988	77.6077	FALSE	FALSE	1	1	0	0	0	FALSE	b	0	308
YY015472	LYG	61.3142	M	TT	current	no	29.5583	0.96875	228.667	120.667	0.64	6.09	1.62	4.517	465.676	16.72	5.69	92.6205	6.463	141.2	36.52	22.1403	89.3325	130.54	13.1875	167.377	91.1077	FALSE	TRUE	1	1	0	0	0	FALSE	a	0	309
YY016019	LYG	61.3826	M	CT	current	current	25.7916	0.905263	169.333	80.6667	2.07	5.12	1.55	3.141	583.832	12.54	5.08	91.0593	11.683	68.8	13.863	20.4616	91.31	115.175	13.7325	153.12	81.4994	FALSE	TRUE	1	1	0	0	0	FALSE	a	1	309
YY016117	LYG	55.8741	M	TT	current	current	23.1247	0.909091	180.667	90.6667	2.41	5.39	1.87	2.642	526.424	16.72	6.2	95.0828	13.81	105.4	20.986	23.0255	93.4825	156.893	14.3025	160.034	89.3913	FALSE	FALSE	1	0	0	0	0	TRUE	b	1	310
YY016142	LYG	55.6742	M	CC	no	no	30.303	0.972222	170.667	91.3333	1.9	6.66	1.24	9.56	653.743	9.71	6.96	99.0379	16.007	132	14.858	21.0911	105.448	113.73	15.0825	141.725	75.8407	FALSE	FALSE	1	0	0	0	0	FALSE	b	0	310
YY016261	LYG	66.8994	M	TT	current	current	21.6773	0.88172	188.667	100.667	2.09	6.61	1.68	4.968	313.382	22.41	6.78	88.2216	5.192	75	24.091	22.5576	95.255	NA	7.755	144	95	FALSE	FALSE	1	0	0	0	0	FALSE	a	1	311
YY016638	LYG	67.0089	M	CT	past	current	20.5249	0.791667	165.333	100.667	0.9	6.68	1.45	7.329	360.205	14.64	5.26	83.9647	11.159	83.4	10.603	20.0188	100.075	79.7225	7.46	131.679	76.2554	FALSE	FALSE	1	0	0	0	0	FALSE	a	0	311
YY016279	LYG	60.8186	M	TT	current	current	25.2823	0.87	180	101.333	0.59	6.33	0.66	6.42	264.58	13.24	5.21	92.9434	14.35	87.1	12.545	20.2081	93.38	88.28	7.78	135.578	85.1238	FALSE	FALSE	0	0	0	0	0	FALSE	a	1	312
YY016837	LYG	60.8214	M	CC	no	no	26.1066	0.879121	174.667	102	2.26	5.44	0.87	4.035	366.958	12.05	6.89	95.1984	16.476	111.4	15.676	19.5119	108.18	84.905	5.3525	139.609	85.5	FALSE	FALSE	1	1	0	0	0	FALSE	a	0	312
YY016313	LYG	66.6749	F	TT	no	no	23.9913	1.12766	180.667	98	1.17	6.46	2.22	5.997	347.175	14.89	6.6	94.1017	19.354	87.6	10.653	22.8535	94.965	82.4075	7.675	137.181	85.9155	FALSE	FALSE	1	0	0	0	0	FALSE	a	1	313
YY016617	LYG	66.2341	F	CT	no	no	29.3413	0.989899	190.667	85.3333	1.26	5.61	1.15	4.301	371.592	12.2	7.1	94.1066	7.565	50.3	9.353	21.069	105.093	74.0225	7.075	146.032	77.5993	FALSE	FALSE	0	0	0	0	0	FALSE	a	0	313
YY016371	LYG	57.5003	M	CT	current	current	22.7634	0.910891	158	90	1.16	5.69	1.22	3.209	576.634	13.83	5.64	70.0921	16.378	125.6	17.616	20.4961	99.3925	78.8475	8.5	141.657	82.2484	FALSE	FALSE	0	0	0	0	0	FALSE	b	1	314
YY016881	LYG	57.4976	M	CT	no	no	22.1443	0.88172	146.667	76.6667	0.79	4.85	0.9	9.442	332.034	11.61	5.93	94.4898	7.514	71.4	6.679	21.8133	112.642	88.1575	6.31	129.632	64.8502	FALSE	TRUE	0	0	0	0	0	FALSE	b	0	314
YY016378	LYG	56.4956	F	CT	no	no	22.2664	0.954545	169.333	101.333	0.85	4.65	1.75	5.106	508.49	6.58	6.4	110.796	12.741	85	8.419	20.8219	111.248	91.0375	10.7675	126.816	81.9882	FALSE	TRUE	1	1	0	0	0	FALSE	a	0	315
YY016458	LYG	56.4298	F	CC	no	no	26.9725	0.813725	240	110	4.88	5.62	0.86	9.118	355.456	10.79	6.9	99.8576	19.959	95.9	14.536	22.0485	116.097	111.96	7.475	161	93.6667	FALSE	TRUE	1	0	0	0	0	FALSE	a	1	315
YY016218	LYG	51.4251	F	CT	no	no	26.1012	0.9	162.667	99.3333	1.25	5.43	2.36	9.29	476.476	8.55	6.72	110.124	11.924	115.4	10.951	20.1964	114.207	103.015	10.2825	126.649	75.9994	FALSE	TRUE	1	0	0	0	0	FALSE	b	0	316
YY016470	LYG	51.4004	F	CT	no	no	19.0945	0.727273	196.667	120	1.26	4.54	1.44	7.663	300.943	8.72	5.16	84.75	12.784	72.1	8.112	18.1532	87.475	98.4325	7.16	149.444	97.1436	FALSE	TRUE	1	1	0	0	0	FALSE	b	1	316
YY016314	LYG	59.1321	M	CT	current	current	23.03	0.9375	172	101.333	0.48	5.64	0.76	8.212	450.578	12.05	6.36	97.6637	8.498	63.9	9.485	21.3371	83.97	87.91	9.6325	162.721	86.2517	FALSE	FALSE	1	0	0	0	0	FALSE	b	0	317
YY016583	LYG	59.0773	M	CT	current	current	22.7175	0.835052	226.667	137.333	1.17	5.41	1.28	6.888	175.082	14.29	6.8	86.745	12.358	138	14.834	20.9133	85.225	103.945	7.9225	139.256	84.1931	FALSE	FALSE	1	1	0	0	0	FALSE	b	1	317
YY016228	LYG	63.7536	F	CT	no	no	27.0389	0.903846	219.333	110	1.12	6.77	1.66	8.548	327.489	7.02	7	98.5254	18.109	77.7	8.42	19.7274	108.26	75.75	8.615	133.842	81.2674	FALSE	FALSE	1	1	0	0	0	FALSE	b	0	318
YY016615	LYG	63.7372	F	CT	no	no	26.4663	0.857143	160	87.3333	1.5	6.51	1.18	8.021	356.718	12.75	6.15	89.4556	10.969	77.1	11.069	22.3716	88.0425	93.7	6.26	150.761	85.6166	FALSE	TRUE	1	1	0	0	0	FALSE	b	1	318
YY016533	LYG	70.2533	F	CT	no	no	22.3834	0.797753	209.333	119.333	1.4	7.11	1.85	9.455	326.561	16.92	6.31	70.9623	15.144	69.1	9.628	20.3443	117.515	95.815	11.165	160.309	87.9796	FALSE	FALSE	1	1	0	0	0	FALSE	b	0	319
YY016631	LYG	70.13	F	CT	current	no	26.6586	0.886364	172	100	1.89	6.28	1.55	15.84	365.62	12.27	6.45	83.6043	12.775	59	15.58	20.8307	100.593	92.9475	4.27	145.57	85.6103	FALSE	FALSE	1	1	0	0	0	FALSE	b	1	319
YY016700	LYG	53.1718	M	CC	current	current	21.6672	0.931034	186.667	100.667	1.07	6.22	1.92	13.155	323.066	9.3	5.54	104.496	12.327	123.9	19.031	17.9658	75.9525	84.1675	7.9725	160.667	100	FALSE	FALSE	0	0	0	0	0	FALSE	b	0	320
YY016761	LYG	53.1964	M	CT	current	past	37.0793	0.963636	165.333	120	3.6	6.1	0.86	3.49	374.915	11.8	5.4	101.822	12.285	82	7.343	23.2095	117.162	125.433	7.5225	134.322	88.5266	FALSE	TRUE	1	1	0	0	0	FALSE	b	1	320
YY016416	LYG	67.3593	M	TT	current	current	22.5686	0.870968	158	83.3333	0.67	5.09	1.45	3.599	310.54	17.39	6.63	94.8779	10.659	42.5	21.927	20.4448	121.075	73.8175	8.5625	139.657	83.7008	FALSE	FALSE	1	1	0	0	0	FALSE	b	0	321
YY016762	LYG	67.6003	M	TT	no	no	23.8752	0.913043	178.667	120	1.12	5.96	1.48	3.141	417.455	21.71	5.01	79.7577	12.357	77.3	17.891	22.3517	89.82	86.4125	8.14	141.567	89.1317	FALSE	FALSE	1	0	0	0	0	FALSE	b	1	321
YY016707	LYG	68.2628	F	CC	no	no	29.2601	1	166	93.3333	1.27	NA	1.42	5.917	370.664	NA	NA	NA	13.069	83.1	9.768	21.1858	100.475	74.79	6.69	138.755	79.6752	FALSE	FALSE	1	1	0	0	0	FALSE	a	0	322
YY016789	LYG	68.4764	F	TT	no	no	24.9827	0.9	191.333	85.3333	1.74	8.19	1.26	4.836	448.617	12.09	15.27	90.3929	12.962	74.2	12.335	18.4964	123.353	84.91	9.8225	162.331	84.8923	FALSE	FALSE	1	0	0	0	0	TRUE	a	1	322
YY016810	LYG	61.9521	F	CC	no	no	23.2629	0.956522	190	110	2.18	6.51	1.14	7.742	361.963	9.06	4.96	94.1058	14.48	58.9	8.781	21.3708	111.338	123.03	7.51	143.146	91.7806	FALSE	FALSE	1	1	0	0	0	FALSE	a	1	323
YY016953	LYG	61.8563	F	CC	no	no	21.9138	0.963415	182.667	104.667	0.7	6.78	1.84	9.28	417.449	12.95	5.57	93.2504	9.92	58.8	8.21	21.7576	96.715	76.59	7.34	146.395	85.3653	FALSE	FALSE	1	1	0	0	0	FALSE	a	0	323
YY016586	LYG	65.5688	F	CT	no	no	23.1572	0.865979	250.667	139.333	1.23	8.93	1.85	9.761	656.112	7.18	8.05	92.8361	14.612	75.7	20.432	18.4614	90.6175	95.4575	8.3225	167.627	94.5848	FALSE	TRUE	1	1	0	0	0	FALSE	b	0	324
YY016914	LYG	65.7604	F	CC	no	current	30.385	0.869159	220.667	110	1.9	8.08	1.38	10.591	790.396	10.53	7.72	91.3698	22.773	84	10.119	19.5466	131.893	97.7225	11.6575	149.191	84.3173	FALSE	FALSE	1	1	1	1	0	FALSE	b	1	324
YY016429	LYG	57.9357	F	CT	no	no	28.3987	0.891089	160.667	90	1.87	5.18	1.15	5.857	420.833	11.45	9.73	96.1129	11.977	79.4	7.307	18.8968	98.255	87.8125	8.5175	135.905	79.1736	TRUE	TRUE	1	1	1	0	0	TRUE	a	0	325
YY016932	LYG	57.7057	F	CT	no	no	27.0895	0.988889	141.333	94	1.98	7.34	1.1	4.589	198.848	24.06	7.97	98.0521	15.28	74.7	6.431	20.2711	103.61	92.6225	8.7225	131.122	87.7616	FALSE	TRUE	1	0	0	0	0	FALSE	a	1	325
YY017015	LYG	73.1417	M	CC	current	past	26.9338	1.04348	192.667	89.3333	1.8	5.39	1.06	4.737	424.31	14.01	6.65	62.2061	11.995	119.9	17.662	19.8605	90.19	107.498	12.1275	132.236	76.1658	FALSE	TRUE	0	1	0	0	0	FALSE	a	1	326
YY017724	LYG	73.2594	M	CC	current	current	27.9297	0.958333	149.333	70	1.08	6.26	1.49	7.563	475.001	10.44	5.84	94.4043	6.034	52	15.282	19.9559	115.502	94.18	7.15	139.507	73.9626	FALSE	FALSE	1	1	0	0	0	FALSE	a	0	326
YY017111	LYG	50.9432	F	TT	no	no	24.7768	0.83	180.667	99.3333	2.1	4.62	1.44	12.543	353.609	10.7	5.82	109.417	12.664	84.1	9.069	19.1038	99.5575	91.345	5.975	144.747	85.9167	FALSE	TRUE	1	1	0	0	0	FALSE	b	1	327
YY018024	LYG	50.9459	F	CT	no	no	29.2969	0.92233	162.667	103.333	1.55	5.84	1.15	8.38	356.177	8.17	5.63	107.872	8.293	54.5	10.309	18.7754	121.78	107.457	10.165	132.001	80.5504	FALSE	FALSE	1	0	0	0	0	FALSE	b	0	327
YY017119	LYG	59.499	M	CT	past	current	32.2621	1.03636	181.333	100.667	2.6	5.41	1.04	18.867	459.538	13.64	6.82	90.0893	13.588	125.8	24.137	17.6611	104.975	230.475	7.315	140.204	83.0996	FALSE	TRUE	1	1	0	0	0	FALSE	a	1	328
YY017660	LYG	59.603	M	TT	no	current	27.8994	0.92	200	120	6.34	6.68	1	2.208	308.385	69.08	9.89	98.4944	10.487	76.1	11.078	18.487	95.78	110.882	8.83	118.952	77.9979	FALSE	TRUE	1	0	1	0	0	FALSE	a	0	328
YY017189	LYG	60.5777	F	CT	no	no	28.4618	0.86	180.667	94	2.99	6.02	1.1	10.173	388.698	9.66	5.98	106.06	14.379	88.1	15.105	19.1996	98.6825	127.255	7.15	169	92	FALSE	FALSE	0	1	0	0	0	FALSE	a	1	329
YY017577	LYG	60.679	F	CC	no	no	24.3948	0.88172	159.333	94	3.35	7.31	1.43	4.863	515.571	12.46	5.06	98.3305	7.273	70.4	16.468	20.6776	99.62	101.77	10.2775	141.744	80.0645	FALSE	FALSE	1	0	0	0	0	FALSE	a	0	329
YY017209	LYG	64.1478	F	CT	no	no	28.2222	0.724138	170.667	84.6667	0.7	4.98	1.38	3.162	891.4	10.1	4.56	99.7244	5.8	30.5	6.837	22.0437	122.745	58.9075	7.305	148.054	83.9595	FALSE	FALSE	1	0	0	0	0	FALSE	b	1	330
YY018119	LYG	64.1889	F	CT	no	no	27.4762	0.9	160.667	80.6667	2.43	6.23	1.84	11.985	377.959	11.86	5.72	103.887	15.035	54.6	7.055	22.7237	109.27	123.243	7.535	138.838	68.6489	FALSE	TRUE	1	0	0	0	0	FALSE	b	0	330
YY017158	LYG	69.5469	F	CT	no	no	24.5155	0.922222	182.667	118.667	1.28	6.11	2.07	4.606	388.962	9.53	6.45	93.4382	12.119	68.5	7.272	21.3539	118.058	80.75	6.4625	132.644	85.1196	FALSE	FALSE	1	1	0	0	0	FALSE	b	0	331
YY017273	LYG	69.6181	F	TT	no	no	28.764	0.9375	193.333	94	2.34	6.27	0.92	7.828	382.588	9.39	8.82	95.8988	6.734	47.8	9.889	17.5799	151.7	76.015	7.6175	151.786	79.5568	FALSE	TRUE	1	0	0	0	0	FALSE	b	1	331
YY017265	LYG	58.5106	M	TT	no	no	27.2311	1.00971	176.667	95.3333	1.2	4.2	0.96	8.311	389.504	12.28	14.93	95.1721	7.428	59.4	10.571	18.7787	92.6975	102.11	7.115	136.672	79.9373	FALSE	FALSE	1	0	0	0	0	TRUE	a	0	332
YY017382	LYG	58.4257	M	CT	current	current	24.0346	0.9	190.667	105.333	1.27	6.52	1.28	10.613	531.538	9.33	5.73	96.6513	7.593	102.2	9.125	18.5787	106.638	82.3975	8.665	171.188	99.3952	FALSE	FALSE	1	0	0	0	0	FALSE	a	1	332
YY016989	LYG	59.3265	M	CC	current	no	25.4065	0.868132	178	101.333	1.46	4.87	1.11	4.025	302.913	23.33	5.01	83.2431	7.376	94.9	8.89	22.1789	111.95	91.425	5.2175	158.08	88.0804	FALSE	TRUE	0	0	0	0	0	FALSE	a	0	333
YY017480	LYG	59.4442	M	CT	no	no	26.1719	0.944444	168.667	110.667	1.93	6.49	0.96	9.984	468.063	10.37	13.63	102.106	9.59	51.2	6.565	19.7595	118.17	70.22	8.7025	136	84.3333	FALSE	FALSE	0	0	0	0	0	FALSE	a	1	333
YY017564	LYG	73.2512	M	CC	current	current	22.6409	0.877778	142.667	74	1.06	4.93	1.17	4.382	318.241	10.25	5.08	68.0588	5.979	74.3	9.292	21.0809	108.805	80.8725	7.565	137.731	80.1024	FALSE	TRUE	0	0	0	0	0	FALSE	b	1	334
YY017757	LYG	73.2375	M	CT	past	no	24.6154	0.957895	153.333	80	1.65	6.12	1.36	8.741	438.549	14.34	6.51	94.742	3.954	101.6	12.229	22.8232	170.905	85.3775	11.205	122.333	63.3333	FALSE	FALSE	0	0	0	0	0	FALSE	b	0	334
YY017087	LYG	60.7748	F	CC	past	no	31.25	0.990476	158.667	90.6667	3.48	6.36	1.13	14.294	409.607	11.24	6.25	96.5725	20.378	103.4	11.293	19.5175	99.7825	89.855	7.3225	130.662	78.5731	FALSE	TRUE	0	0	0	0	0	FALSE	b	0	335
YY017579	LYG	60.8734	F	CT	no	no	28.2284	1.05263	156.667	90.6667	1.61	7.35	1.54	8.619	452.881	10.69	14.26	104.955	8.867	53.1	12.613	17.0037	104.86	93.9	7.2125	167.773	91.5328	FALSE	TRUE	1	1	0	0	0	FALSE	b	1	335
YY017696	LYG	56.6927	M	CC	past	current	24.6355	0.811111	164	100	0.89	5.76	1.84	5.013	367.09	26.03	5.57	98.7242	9.513	81.7	11.734	22.2695	94.1625	101.502	9.0525	151.32	93.3793	FALSE	FALSE	1	1	0	0	0	FALSE	a	1	336
YY017742	LYG	56.6653	M	CT	current	current	23.7387	0.97	153.333	87.3333	4	4.68	0.99	1.921	349.84	46.9	5.74	96.1035	5.132	101.2	9.806	21.0164	87.2325	124.485	10.2475	140.361	88.2406	FALSE	FALSE	1	0	0	0	0	FALSE	a	0	336
YY017701	LYG	59.1704	M	CT	current	no	26.5839	0.931373	171.333	90	3.18	6.1	0.86	8.729	422.992	14.47	14.96	93.7286	7.185	77.9	10.856	18.2949	123.26	71.8775	6.2525	132.938	75.3216	FALSE	TRUE	1	0	1	0	0	TRUE	a	1	337
YY017766	LYG	59.1814	M	CT	no	no	24.3266	0.846939	161.333	80.6667	1.8	5.14	0.89	5.011	356.935	19.86	9.42	28.4828	9.137	125.7	8.711	22.2823	109.515	98.5875	6.135	137.009	76.9561	FALSE	FALSE	1	0	0	0	0	FALSE	a	0	337
YY017177	LYG	59.7563	F	CT	no	no	25.434	0.911111	160.667	80	1.86	5.4	1.01	13.118	461.53	11.53	6.65	83.4582	7.239	75.4	11.404	19.4611	85.4675	94.865	5.485	149.587	85.1501	FALSE	TRUE	1	1	0	0	0	FALSE	a	0	338
YY017728	LYG	59.7235	F	TT	no	no	26.7229	0.84466	158.667	89.3333	1.23	4.99	1.22	3.824	586.355	27.09	5.39	96.7274	4.611	41.3	12.53	20.5541	125.82	96.09	7.12	139.158	79.1583	FALSE	FALSE	1	0	0	0	0	FALSE	a	1	338
YY017257	LYG	54.82	F	CC	no	no	25.7617	0.841584	144.667	94	1.68	5.83	1.6	7.945	318.105	7.82	5.3	102.087	9.189	53.8	12.878	19.7011	125.035	74.025	7.995	135.338	83.6949	FALSE	TRUE	1	0	0	0	0	FALSE	a	0	339
YY017740	LYG	54.82	F	TT	no	no	21.1927	0.806452	150.667	88.6667	4.31	5.5	0.68	3.312	289.81	19.97	5.03	112.472	8.293	66.9	24.571	18.1474	102.275	109.95	5.5375	124.514	82.4808	FALSE	TRUE	0	0	0	0	0	FALSE	a	1	339
YY016979	LYG	59.1239	F	CT	no	no	28.183	0.971698	172	102.667	2.29	4.57	1.2	4.162	280.195	19.13	5.64	83.6821	8.293	67.2	7.595	21.8974	90.2275	81.4325	7.01	132.815	83.9302	FALSE	TRUE	1	0	0	0	0	FALSE	b	0	340
YY017762	LYG	59.1376	F	CC	no	no	26.2031	0.91	204	90	1.08	5.49	1.87	8.427	536.93	11.35	6.66	84.5675	9.143	65.1	16.387	19.3938	101.772	77.54	7.1375	200	100	FALSE	FALSE	1	1	0	0	0	FALSE	b	1	340
YY017783	LYG	53.3087	F	TT	no	no	21.1702	0.820225	202.667	105.333	1.57	5.53	1.53	4.52	570.708	27.47	5.42	74.405	8.816	55.8	10.84	19.9933	102.965	76.9725	7.1475	157.218	99.5121	FALSE	TRUE	1	1	0	0	0	FALSE	b	1	341
YY017794	LYG	53.2786	F	CT	no	no	22.575	0.768421	151.333	96.6667	1.73	5.97	1.53	14.012	387.552	13.76	5.65	85.8265	7.041	66.8	11.392	19.266	103.707	103.002	6.4825	125.304	81.2637	FALSE	TRUE	1	0	0	0	0	FALSE	b	0	341
YY017887	LYG	67.1759	M	CT	past	no	29.3199	0.735294	175.333	101.333	1.25	5.55	1.16	5.862	571.772	11.56	7.51	71.6641	8.626	66.4	17.525	19.6458	90.8175	77.2075	7.19	148.667	94	FALSE	FALSE	1	0	0	0	0	FALSE	b	1	343
YY018360	LYG	67.1704	M	TT	current	current	22.3081	0.913043	176.667	99.3333	4.7	5.58	1.58	4.177	386.072	29.25	5.48	98.6643	23.57	143.9	18.265	21.1635	106.752	99.3225	7.0925	130.965	73.356	FALSE	FALSE	1	1	0	0	0	FALSE	b	0	343
YY017609	LYG	53.358	F	CT	no	no	27.5312	0.85	175.333	94.6667	1.79	6.63	1.54	7.029	540.35	9.97	6.07	99.7968	6.636	49.1	16.464	20.9239	104.832	95.2825	7.6125	138.647	81.4598	FALSE	FALSE	1	1	0	0	0	FALSE	a	0	344
YY017920	LYG	53.3443	F	CC	no	no	28.6218	0.883495	180.667	99.3333	0.99	4.96	1.61	9.223	376.821	11.74	5.93	90.1597	8.137	55.5	8.319	21.594	145.185	82.6375	8.7525	137.5	85.0758	FALSE	FALSE	1	1	0	0	0	FALSE	a	1	344
YY017950	LYG	72.063	F	CT	no	no	25.6312	0.902913	174.667	94.6667	1.93	7.38	1.18	4.402	544.05	13.39	9.75	73.4249	7.311	31.1	8.83	21.1035	118.718	100.248	7.0025	144.827	74.9542	FALSE	FALSE	1	1	0	0	0	FALSE	b	1	347
YY018023	LYG	72.1177	F	CT	no	no	21.2204	0.820225	218.667	100	0.88	5.98	1.71	10.181	619.167	10.62	6.6	91.4758	9.332	45.3	12.477	22.0933	143.24	89.7475	11.495	166.409	80.1419	FALSE	TRUE	1	1	0	0	0	FALSE	b	0	347
YY017988	LYG	64.9665	F	TT	no	no	32.2133	0.9375	176.667	99.3333	2.46	8.01	1.72	17.556	632.067	11.17	6.86	92.6493	13.472	105.5	9.887	22.2802	139.315	107.233	8.99	129.603	83.5034	FALSE	FALSE	0	0	0	0	0	TRUE	a	1	348
YY018320	LYG	64.961	F	CT	no	no	28.251	0.849057	184.667	99.3333	2.61	5.43	1.29	5.761	301.414	10.82	5.07	95.3582	10.283	38.5	5.314	21.2924	105.695	98.7725	7.7475	147.528	86.0399	FALSE	TRUE	1	1	0	0	0	FALSE	a	0	348
YY017683	LYG	64.8323	F	TT	no	no	25.4524	0.894737	184.667	98.6667	1.38	5.08	1.02	6.395	360.271	13.61	5.87	91.1259	3.159	53.9	8.263	24.246	121.793	88.4575	8.99	132.392	79.2292	FALSE	FALSE	1	0	0	0	0	FALSE	a	0	349
YY018005	LYG	64.8268	F	CT	no	no	25.1532	0.836735	180	95.3333	1.73	6.51	1.05	15.475	535.973	11.42	5.86	94.9266	10.856	49.2	11.498	23.5377	131.702	102.165	9.5025	167.578	90.1542	FALSE	TRUE	1	0	0	0	0	FALSE	a	1	349
YY018014	LYG	62.1821	F	TT	no	no	23.1111	0.888889	165.333	101.333	3.03	9.58	1.31	6.201	370.278	21.12	8.01	95.1258	12.757	57.7	7.186	23.0982	112.145	98.6975	7.2875	133.667	79.6667	FALSE	TRUE	1	0	0	0	0	FALSE	b	1	350
YY018153	LYG	62.078	F	TT	no	no	30.2222	0.935185	172.667	91.3333	1.73	6.73	1.36	7.513	313.284	20.11	6.95	99.6919	8.67	66	7.899	25.1462	118.335	113.61	7.9825	157.594	82.6856	FALSE	TRUE	1	0	0	0	0	FALSE	b	0	350
YY017331	LYG	64.7885	F	CT	no	no	24.5603	0.923913	138.667	90	1.69	4.1	1.15	6.607	339.494	10.27	6.11	80.5596	4.872	52.2	9.126	21.3277	158.262	98.1725	9.16	140.247	82.6216	FALSE	TRUE	1	1	0	0	0	FALSE	a	0	351
YY018091	LYG	64.783	F	TT	no	no	27.1106	0.945055	186.667	139.333	1.69	6.59	1.49	7.644	393	13.22	7.06	96.4342	3.882	56.8	9.037	20.23	98.665	106.94	8.915	168.432	95.4617	FALSE	FALSE	1	1	0	0	0	FALSE	a	1	351
YY018098	LYG	70.9788	M	TT	current	current	22.4813	0.811111	190	93.3333	1.21	6.01	1.62	9.017	381.845	16.97	7.27	92.3811	10.043	61.9	11.246	18.1557	114.885	76.2275	7.9	147.21	66.0088	FALSE	FALSE	1	0	0	0	0	FALSE	a	1	352
YY018296	LYG	70.9706	M	CC	current	no	21.2306	0.894118	166.667	100	1.3	5.32	1.1	8.647	350.905	15.14	5.39	94.5963	6.159	63.5	12.892	18.5931	101.847	79.3575	6.285	144.715	89.1669	FALSE	TRUE	1	1	0	0	0	FALSE	a	0	352
YY017174	LYG	65.4976	M	CT	no	current	27.2109	0.833333	172.667	100	1.35	7.4	1.79	5.064	420.887	14.96	6.56	78.2982	13.902	82.9	9.097	20.7136	110.257	78.4325	7.8575	138.955	85.9041	FALSE	TRUE	1	1	0	0	0	FALSE	b	0	353
YY018107	LYG	65.4757	M	CT	current	current	21.6713	0.777778	178.667	86	0.93	6.24	2.03	6.887	479.249	10.96	11.31	102.186	10.566	67.4	6.099	20.5305	106.862	92.71	10.0575	144.833	68.0833	TRUE	TRUE	0	1	0	0	0	TRUE	b	1	353
YY018148	LYG	69.8782	M	CT	past	current	28.0404	0.833333	128.667	89.3333	1.26	7.03	1.33	7.037	457.957	11.93	5.63	73.6065	10.261	63.5	12.795	22.619	135.778	101.922	10.6425	135.837	85.2999	FALSE	TRUE	1	1	0	0	0	FALSE	b	1	354
YY018312	LYG	69.9849	M	TT	past	current	25.565	0.761468	199.333	120	2.01	6.36	1.3	4.574	325.235	20.95	5.25	66.0092	8.194	71.9	12.569	18.7085	114.683	114.368	8.3275	137.783	94.1012	FALSE	FALSE	1	1	0	0	0	FALSE	b	0	354
YY017888	LYG	72.3504	F	CT	no	no	33.7604	0.961538	190.667	108	1.69	6.75	1.48	21.659	409.199	10.78	7.41	91.1544	13.679	62.1	14.835	19.4833	108.528	100.215	9.125	127.968	79.4749	FALSE	TRUE	1	1	0	0	0	FALSE	a	0	355
YY018165	LYG	72.0356	F	CT	no	no	28.3039	0.833333	189.333	110	2.13	7.85	1.49	4.61	354.754	12.67	5.74	80.3754	13.069	76.8	13.633	21.3103	102.64	184.912	6.0925	165.049	91.2876	FALSE	TRUE	1	1	0	0	0	FALSE	a	1	355
YY017814	LYG	71.7153	F	CT	no	no	30.5438	0.961165	189.333	91.3333	4.58	7.23	0.71	3.691	373.682	14.38	6.87	95.9758	8.056	68.5	10.397	21.6188	115.195	86.195	5.7	136.875	70.6792	FALSE	TRUE	1	0	0	0	0	FALSE	a	0	356
YY018189	LYG	72.0027	F	TT	no	no	28.6667	0.881188	160	83.3333	2.5	7.42	1.52	9.931	290.091	16.41	6.73	88.4307	10.664	84.1	8.601	22.1288	126.442	104.12	8.83	134.628	70.1332	FALSE	FALSE	0	0	0	0	0	FALSE	a	1	356
YY018235	LYG	60.2245	M	CT	current	current	26.7229	0.877551	170	99.3333	1.97	6.5	1.24	8.976	414.978	13.74	13.65	82.4908	7.118	76.1	8.56	18.9438	116.52	115.862	11.375	149.529	83.0954	FALSE	TRUE	1	0	0	0	0	TRUE	a	1	357
YY018290	LYG	60.0739	M	TT	no	current	26.2917	0.978723	189.333	110	1.67	4.43	1.55	4.82	307.801	56.35	5.28	73.167	7.808	68.4	8.4	21.8028	114.022	84.2875	8.1925	126.481	79.0588	FALSE	TRUE	1	0	0	0	0	FALSE	a	0	357
YY017533	LYG	64.5969	F	CT	no	no	25.8475	0.8	203.333	85.3333	0.88	4.87	1.29	7.444	259.117	16.47	6.48	80.3843	7.613	71.6	9.256	20.4648	155.965	70.3825	7.715	147.73	76.4745	FALSE	TRUE	1	1	0	0	0	FALSE	b	0	358
YY018254	LYG	64.6051	F	CT	no	no	28.5156	0.841584	184	111.333	1.22	3.54	1.56	10.131	325.891	10.28	4.8	92.6768	7.609	49.1	8.624	21.4698	129.048	84.5475	8.755	163.911	107.299	FALSE	TRUE	1	1	0	0	0	FALSE	b	1	358
YY017324	LYG	46.9514	M	TT	no	no	31.0735	0.981481	168	130.667	2.55	4.73	0.91	3.444	504.559	37.51	5.32	105.356	4.968	52.8	10.916	21.0502	91.585	117.955	8.345	144.174	95.9187	FALSE	TRUE	1	1	0	0	0	FALSE	a	0	359
YY018300	LYG	46.9432	M	CT	current	no	22.8374	0.860215	179.333	104.667	0.89	5.99	1.93	7.88	341.186	11.6	4.61	102.405	10.485	67.2	9.385	22.8353	94.8575	92.65	8.68	149.216	96.8945	FALSE	TRUE	1	1	0	0	0	FALSE	a	1	359
YY017732	LYG	54.694	F	CT	no	no	29.5858	0.92381	173.333	113.333	4.46	5.03	1.08	7.896	434.464	9.69	5.32	102.239	10.905	81.7	15.671	19.6598	69.975	113.425	7.345	128.676	82.2707	FALSE	TRUE	1	0	0	0	0	FALSE	b	0	360
YY018303	LYG	54.7296	F	TT	no	no	29.5525	0.845455	164	100	1.34	4.55	1.35	7.007	278.965	10.81	5.09	104.973	7.413	41.8	8.613	18.3551	86.695	65.0675	7.6525	134.667	88.6667	FALSE	FALSE	0	0	0	0	0	FALSE	b	1	360
YY018567	LYG	54.987	M	TT	no	past	21.7079	0.809524	160.667	99.3333	1.26	4.6	1.06	4.061	328.2	47.12	7.29	96.4732	6.146	41.9	11.898	20.1235	88.4275	171.833	6.4475	136.251	84.8443	FALSE	TRUE	1	0	0	0	0	FALSE	a	1	361
YY019090	LYG	55.0527	M	TT	current	current	21.5139	0.95	162	100	1.62	5.33	1.62	7.861	449.208	20.51	11.97	103.51	7.655	152.6	17.084	20.744	95.5925	93.9175	9.4775	139.068	84.5067	FALSE	FALSE	0	0	0	0	0	FALSE	a	0	361
YY018617	LYG	61.4483	M	TT	past	no	24.6904	0.846939	168.667	100	4.75	6.55	0.83	4.375	329.741	25.73	9.11	97.11	13.615	53.1	8.784	19.7824	103.093	105.33	8.4675	155.321	90.8415	FALSE	FALSE	0	0	0	0	0	FALSE	a	1	362
YY019162	LYG	61.4292	M	CT	past	no	25.204	0.915789	161.333	83.3333	1.44	4.64	1.42	4.264	345.079	13.21	3.98	94.4227	7.07	73.3	20.631	21.4281	85.605	91.2075	9.0475	145.077	82.3428	FALSE	FALSE	0	0	0	0	0	FALSE	a	0	362
YY018696	LYG	60.6899	F	TT	no	no	29.4321	0.885714	156	86.6667	1.86	5.76	1.33	5.848	281.471	11.85	8.77	100.536	7.387	41.3	5.138	24.2107	97.03	118.302	8.955	129.286	81.0352	TRUE	TRUE	1	1	0	0	0	TRUE	a	1	363
YY018875	LYG	60.7228	F	TT	no	no	23.4415	0.885057	159.333	100	1.44	5.96	1.34	7.104	394.59	14.32	5.62	81.8809	8.304	39.8	9.452	19.9979	122.58	90.505	7.56	123.857	84.0894	FALSE	FALSE	0	0	0	0	0	FALSE	a	0	363
YY018705	LYG	56.7173	F	TT	no	no	23.1562	0.822222	156	92.6667	2.07	6.14	1.14	5.038	372.556	12.08	7.9	81.0904	8.265	60.6	9.944	21.4718	126.625	91.3575	9.5925	120.596	71.4983	TRUE	FALSE	0	0	0	0	0	TRUE	a	1	364
YY019211	LYG	56.7064	F	CT	no	no	24.3232	0.902174	170.667	80	3.86	6.9	0.68	3.457	410.166	13.23	12.1	109.493	7.198	103.6	17.397	21.0679	110.677	88.4	6.545	146.62	80.6471	TRUE	TRUE	1	0	0	0	0	TRUE	a	0	364
YY018731	LYG	53.1307	F	CT	no	no	23.6304	0.85567	162	110.667	2.4	6.14	1.78	4.997	464.87	11.37	5.41	96.1912	5.208	50.5	12.379	22.7903	117.903	88.2675	11.0025	144.51	93.1542	FALSE	FALSE	1	1	0	0	0	FALSE	a	1	365
YY019245	LYG	53.1061	F	CT	no	no	27.4077	0.883495	170	90	1.84	5.68	1.84	5.523	276.139	26.53	4.19	106.744	6.178	59.4	6.486	19.5393	99.895	73.635	5.105	134.709	82.1087	FALSE	FALSE	1	0	0	0	0	FALSE	a	0	365
YY018766	LYG	53.8973	M	CT	past	no	26.6991	0.907216	145.333	109.333	4.01	6.7	1.33	4.896	511.974	12.35	7.34	101.263	7.051	62.3	17.368	23.6884	108.45	115.695	11.1725	138.657	84.6317	FALSE	FALSE	0	0	0	0	0	FALSE	a	1	366
YY018942	LYG	53.87	M	CC	no	current	23.0721	0.833333	136	80	1.92	7.66	1.24	5.943	434.422	14.35	7.12	86.8569	8.287	89.9	12.695	21.2399	91.41	81	8.015	124.25	79.2566	FALSE	TRUE	0	0	0	0	0	FALSE	a	0	366
YY018413	LYG	60.0493	F	CC	no	no	31.1972	0.885714	178.667	89.3333	2.46	6.12	1.11	3.679	520.499	12.48	6.56	92.5108	12.284	81.5	14.823	21.5471	104.457	93.2575	7.99	130.042	72.1707	FALSE	TRUE	1	0	0	0	0	FALSE	b	0	367
YY018781	LYG	60.0438	F	CC	no	no	28	0.86	166.667	99.3333	1.15	6.64	1.85	9.867	297.576	9.01	5.71	105.889	6.715	33.1	6.978	23.2288	116.993	185.512	7.4025	149.088	92.9977	FALSE	TRUE	1	1	0	0	0	FALSE	b	1	367
YY018575	LYG	67.4031	M	CC	no	no	21.9723	0.836735	159.333	91.3333	1.25	6.55	1.4	5.342	393.039	14.61	5.15	73.2365	7.857	42.9	10.727	22.6227	102.86	79.4575	12.0075	129.661	80.0825	FALSE	FALSE	0	0	0	0	0	FALSE	a	0	368
YY018787	LYG	67.3812	M	CC	no	no	26.6389	0.824742	174.667	90.6667	1.96	5.88	1.08	3.594	276.645	35.32	6.15	72.9616	5.208	47.6	9.506	20.5325	79.455	94.3175	7.255	140.472	80.6247	FALSE	FALSE	1	0	0	0	0	FALSE	a	1	368
YY018843	LYG	63.1485	F	CC	no	no	25.2994	0.920354	164.667	94	2.58	7.88	1.33	5.287	400.348	8.51	4.96	97.2412	7.157	38.2	8.193	22.564	110.618	105.188	8.2625	148.44	91.5315	FALSE	FALSE	1	1	0	0	0	FALSE	a	1	369
YY019699	LYG	63.154	F	CT	no	no	26.805	0.892473	173.333	112.667	1.28	6.31	1.66	4.732	467.678	13.14	5.39	81.7785	6.987	59.5	10.215	24.3506	130.52	116.87	8.445	165.333	99.3333	FALSE	TRUE	0	0	0	0	0	FALSE	a	0	369
YY018433	LYG	69.2923	F	CT	past	no	19.2894	0.795699	141.333	91.3333	1.11	4.64	1.91	9.872	842.068	6.7	5.91	65.3892	5.655	43.2	4.612	23.2541	125.985	86.23	8.545	128.655	74.6209	FALSE	TRUE	0	1	0	0	0	FALSE	b	0	371
YY018932	LYG	69.3799	F	CT	no	no	27.667	0.979592	218.667	109.333	5.84	3.46	0.86	4.701	398.808	11.96	5.79	82.4948	5.102	73.4	11.641	21.3928	79.1475	76.2825	6.8625	145.994	82.4336	FALSE	FALSE	1	1	0	0	0	FALSE	b	1	371
YY018933	LYG	67.0171	F	CC	no	no	24.1603	0.887755	179.333	90	1.52	5.7	1.04	4.397	310.6	15.59	5.97	93.3086	3.912	40.5	14.268	19.1932	112.623	95.0775	5.975	132.763	75.0202	FALSE	TRUE	0	1	0	0	0	FALSE	a	1	372
YY019585	LYG	67.0116	F	TT	no	no	27.3399	0.822917	170.667	93.3333	2.24	7.38	1.29	8.362	353.366	10.26	5.88	100.678	9.409	45.1	12.909	20.2147	101.4	94.6225	7.96	150.759	84.3403	FALSE	TRUE	1	0	0	0	0	FALSE	a	0	372
YY018674	LYG	66.0507	F	CT	no	no	31.6337	0.869159	185.333	102	1.03	5.92	1.6	7.083	774.952	11.65	5.28	67.2025	7.976	59.3	18.9	19.9062	119.782	101.505	9.26	132.206	81.3285	FALSE	TRUE	0	0	0	0	0	FALSE	a	0	373
YY018951	LYG	65.7878	F	CT	no	no	25.4152	0.829897	200	90	2.6	6.86	1.25	5.269	349.78	11.65	5.18	99.6973	10.453	61.8	15.32	23.1718	146.245	109.828	8.3025	154.404	83.5169	FALSE	TRUE	1	0	0	0	0	FALSE	a	1	373
YY018880	LYG	56.4079	M	CT	no	no	29.7521	0.981132	149.333	96.6667	0.9	7.21	1.78	9.438	609.737	12.87	7.32	80.3762	7.792	63.9	12.322	23.7321	117.603	108.733	9.1325	133.358	87.6972	FALSE	FALSE	1	1	0	0	0	FALSE	a	0	374
YY018974	LYG	56.3806	M	CT	current	current	23.9336	0.894444	160	109.333	0.71	7.03	1.64	8.426	309.466	16.66	5.03	95.5836	5.678	84.5	11.604	21.0131	97.9375	88.7875	7.275	146.738	105.345	FALSE	TRUE	1	0	0	0	0	FALSE	a	1	374
YY019175	LYG	54.4586	F	CT	no	no	30.2978	0.951456	170	100	2.5	5.59	1.06	5.152	395.061	11.55	4.93	108.66	8.329	53.9	11.279	21.8562	113.845	777.565	6.7	144.58	81.5203	FALSE	FALSE	1	0	0	0	0	FALSE	b	1	375
YY019614	LYG	54.4312	F	TT	no	no	25.9234	0.861702	167.333	83.3333	2.9	5.62	0.83	4.948	371.968	15.8	8.23	105.826	4.761	67.9	7.518	20.3088	98.77	104.037	5.3725	144.289	78	FALSE	TRUE	1	1	1	0	0	TRUE	b	0	375
YY019197	LYG	46.7461	M	CC	past	current	27.2392	0.823529	150.667	110	4.41	5.59	0.99	4.01	491.624	12.3	4.47	116.724	6.712	75.4	10.431	22.0733	53.82	92.405	7.125	132.767	89.2738	FALSE	FALSE	0	0	0	0	0	FALSE	a	1	376
YY019296	LYG	46.5517	M	CC	current	no	26.8122	0.873786	156.667	97.3333	1.9	5.35	0.99	8.929	419.165	11.92	5.26	102.042	6.228	78.7	10.272	NA	NA	NA	NA	149.187	98.5193	FALSE	TRUE	1	0	0	0	0	FALSE	a	0	376
YY019208	LYG	67.8248	M	CC	current	current	26.5625	0.897196	160.667	90.6667	1.34	5.79	1.15	5.072	380.813	14.19	4.54	81.3422	4.622	69.4	9.535	20.6554	110.578	84.785	5.85	142.848	87.6211	FALSE	TRUE	1	0	0	0	0	FALSE	a	1	377
YY019298	LYG	67.8166	M	TT	past	past	26.5625	0.842105	220	101.333	2.33	4.73	0.92	3.164	387.162	18.02	5.33	87.0354	7.54	102.1	11.209	23.8453	99.925	87.49	9.345	125.607	73.5132	FALSE	FALSE	1	1	0	0	0	FALSE	a	0	377
YY019221	LYG	53.7878	F	CC	no	no	30.1788	0.834862	244	110	2.07	6.22	1.11	11.533	331.778	15.19	8.86	99.2237	6.363	50.6	8.166	18.7223	103.157	76.5825	5.0675	151.788	83.8392	FALSE	FALSE	1	1	0	0	0	FALSE	a	1	378
YY019391	LYG	53.7823	F	CT	no	no	26.5625	0.892157	176	90.6667	4.21	6.98	1.26	6.075	440.877	8.05	5.67	115.208	9.996	102.7	8.578	18.2347	99.8725	117.495	6.5725	124.331	74.2669	FALSE	TRUE	1	0	0	0	0	FALSE	a	0	378
YY019318	LYG	57.5305	F	CC	no	no	26.3702	0.85	161.333	89.3333	1.39	5.64	1.25	7.002	463.989	9.55	5.31	82.8683	4.677	73.2	12.075	21.7254	96.4575	75.4525	6.9275	125.348	77.0774	FALSE	FALSE	0	1	0	0	0	FALSE	b	1	379
YY019575	LYG	57.5496	F	CC	no	no	23.0681	0.882979	177.333	76	1.83	6.21	1.36	8.259	337.581	9.59	4.67	103.673	9.028	59.3	18.15	18.9194	99.9975	93.56	6.7875	131.226	76.1225	FALSE	FALSE	1	0	0	0	0	FALSE	b	0	379
YY019177	LYG	64.7447	F	CC	no	no	25.721	0.822917	157.333	80	0.92	5.66	1.92	4.496	458.042	14.36	5.78	74.0047	7.153	62.2	8.326	20.5885	112.192	98.755	8.1675	129.108	73.3666	FALSE	FALSE	1	0	0	0	0	FALSE	a	0	381
YY019361	LYG	64.7666	F	TT	no	no	26.1249	0.893204	180	90.6667	2.07	7.37	1.17	6.99	346.844	14.54	8.07	101.818	9.521	80.7	8.511	20.4315	137.205	112.752	8.17	147.536	74.8621	FALSE	TRUE	1	1	0	0	0	FALSE	a	1	381
YY019136	LYG	71.9535	M	TT	current	no	24.4796	0.845361	188.667	90	1.55	5.71	1.56	4.596	579.339	14.4	5.68	77.031	5.819	70.4	15.382	24.3739	96.505	106.737	8.51	131.143	75.858	FALSE	TRUE	1	1	0	0	0	FALSE	b	0	382
YY019418	LYG	71.9918	M	TT	no	current	25.462	0.94	192.667	100	1.44	5.67	1.11	3.723	420.903	20.53	4.07	74.0974	6.317	60.7	28.997	21.9394	117.487	82.405	8.9725	150.641	79.3268	FALSE	TRUE	1	0	0	0	0	FALSE	b	1	382
YY018769	LYG	59.1567	F	CT	no	no	27.6787	0.886598	188	100	3.07	7.86	1.18	9.511	682.674	10.74	5.6	101.826	17.303	80.7	17.949	21.2607	133.977	113.942	9.0875	140.485	78.1193	FALSE	FALSE	1	0	0	0	0	FALSE	b	0	383
YY019448	LYG	59.1376	F	CT	no	no	32	0.849057	211.333	140	1.74	6.35	0.94	6.857	474.731	13.13	7.62	66.264	9.536	61.4	9.855	22.3403	132.275	117.272	15.1925	169.857	104.301	FALSE	TRUE	1	1	0	0	0	FALSE	b	1	383
YY018865	LYG	73.8234	F	CC	no	no	29.2841	0.884615	159.333	91.3333	2.91	7.72	1.61	6.542	398.314	13.76	6.21	75.6056	5.571	31.5	3.795	24.3307	119.07	87.165	7.16	133.079	79.3591	FALSE	FALSE	0	1	0	0	0	FALSE	b	0	384
YY019461	LYG	73.8426	F	CT	no	no	22.2222	0.864583	179.333	87.3333	2.1	6.16	0.78	6.238	341.771	24.69	5.41	58.1515	3.881	49.4	5.662	22.886	102.165	110.373	7.96	135.486	82.0423	FALSE	TRUE	1	1	0	0	0	FALSE	b	1	384
YY018649	LYG	73.7933	F	CT	no	no	24.1217	0.846939	250.667	92.6667	2.07	6.16	1.32	6.602	484.862	11.49	5.7	85.5666	7.711	45.9	9.63	20.8651	104.843	143.393	9.975	142.724	68.9187	FALSE	TRUE	1	1	0	0	0	FALSE	b	0	385
YY019565	LYG	73.8426	F	CC	no	no	27.3923	0.909091	220.667	89.3333	1.46	5.33	1.08	17.45	370.581	13.41	4.91	90.7185	6.73	66.4	16.726	19.9922	83.1225	111.978	6.51	148.34	71.9164	FALSE	TRUE	1	1	0	0	0	FALSE	b	1	385
YY019436	LYG	60.219	F	CT	no	no	29.6173	0.766355	177.333	96	2.17	5.11	0.93	9.149	337.509	9.62	4.37	94.9446	5.435	79.9	6.218	19.9901	109.183	91.92	7.4725	133.996	81.4895	FALSE	FALSE	0	0	0	0	0	FALSE	a	0	386
YY019579	LYG	60.2218	F	CT	no	no	26.8386	0.936842	205.333	100	1.84	5.61	1.8	5.862	331.775	17.94	9.33	96.7232	11.602	91.7	17.244	21.2199	126.728	87.4425	9.535	142.313	82.1774	FALSE	TRUE	0	1	0	0	0	FALSE	a	1	386
YY019174	LYG	64.3833	M	CT	current	current	21.6128	0.770833	151.333	92	0.87	5.11	2.11	3.557	406.403	25.36	5.9	93.4255	7.949	92.1	7.769	21.2157	103.353	76.0275	6.455	129.012	74.5255	FALSE	TRUE	1	1	0	0	0	FALSE	a	0	387
YY019605	LYG	64.2272	M	TT	no	past	30.4832	0.962264	198	120	2.8	NA	1.41	2.996	395.012	NA	NA	NA	1.917	71.4	18.78	24.2262	123.3	122.155	9.055	143.098	92.5213	FALSE	FALSE	0	0	0	0	0	FALSE	a	1	387
YY018486	LYG	63.4059	F	CC	no	no	33.3205	0.869565	162	102	1.46	5.41	1.25	5.222	334.847	11.92	5.57	77.3685	4.982	52.6	10.482	20.1626	94.1625	98.3875	7.575	129.734	82.4727	FALSE	TRUE	1	1	0	0	0	FALSE	a	0	388
YY019725	LYG	63.4004	F	TT	no	no	28.1337	0.825243	163.333	94.6667	2.36	5.89	1.22	11.063	428.404	11.5	4.92	92.4432	6.219	92.9	13.767	20.3574	107.405	116.16	6.6025	142.644	86.9525	FALSE	TRUE	1	1	0	0	0	FALSE	a	1	388
YY019466	LYG	56.9829	F	CT	no	no	26.847	0.927835	200	100	1.49	7.96	1.49	20.654	569.477	9.82	17.86	110.596	7.374	50.2	9.193	20.6366	147.145	99.7125	12	161.333	92	FALSE	FALSE	1	0	0	0	0	FALSE	b	0	389
YY019726	LYG	56.9747	F	CC	no	no	26.2719	0.785714	189.333	100	1.18	4.62	1.18	5.603	427.248	13.84	5.8	73.306	2.628	61.9	9.525	23.1573	124.453	81.5625	6.835	159.842	95.846	FALSE	TRUE	0	0	0	0	0	FALSE	b	1	389
YY019129	LYG	53.963	M	CT	current	no	23.1084	0.887755	164.667	104	1.14	4.86	1.21	10.74	304.412	11.14	5.73	100.635	5.197	90.9	9.884	22.2495	98.535	85.5875	6.265	131.216	88.1558	FALSE	FALSE	1	1	0	0	0	FALSE	a	0	390
YY019744	LYG	53.9548	M	CT	past	past	23.3377	0.793478	182.667	100.667	2.73	5.03	1.36	3.067	345.542	78.22	4.98	88.0283	4.135	72.8	13.949	23.2734	72.0775	126.918	5.1475	170.667	82.3333	FALSE	TRUE	1	1	0	0	0	FALSE	a	1	390
YY019474	LYG	56.7201	M	CC	current	current	23.1834	0.908163	178.667	110	2.16	6.18	1.02	4.821	472.136	12.96	5.39	89.7336	6.008	90.2	13.616	24.4435	103.24	113.36	9.07	158.55	96.8902	FALSE	TRUE	1	1	0	0	0	FALSE	b	0	391
YY019754	LYG	56.6845	M	TT	past	no	30.7787	0.921348	183.333	98.6667	1.18	3.61	1.07	4.04	409.406	32.1	5.1	85.1565	4.052	51.1	18.074	20.0594	89.08	76.295	8.3425	159.661	90.8825	FALSE	TRUE	1	1	0	0	0	FALSE	b	1	391
YY019913	LYG	62.9843	M	CT	past	current	27.8159	0.9	161.333	100.667	1.34	8.24	1.85	5.878	455.802	14.05	5.4	67.9281	7.604	152.3	20.842	20.7726	92.495	111.29	10.205	134	85.6667	FALSE	TRUE	1	0	0	0	0	FALSE	b	1	392
YY020087	LYG	62.9979	M	CT	current	no	25.5588	1	186	96	1.09	4.87	1.41	4.188	319.252	14.81	4.59	96.6952	2.876	72.9	8.226	20.6229	90.325	87.345	19.135	136.795	71.9018	FALSE	FALSE	1	1	0	0	0	FALSE	b	0	392
YY019997	LYG	67.0609	M	TT	current	current	24.2188	0.923913	204.667	108.667	2.02	6.3	1.49	4.851	369.134	46.01	4.33	29.7979	5.378	174.1	10.394	21.4818	87.9175	90.79	7.9325	135.793	96.5978	FALSE	FALSE	1	1	0	0	0	FALSE	b	1	393
YY021432	LYG	67.0308	M	CT	past	past	27.852	1	164	108	2.54	5.12	0.77	3.832	406.993	24.59	5.9	55.7307	8.683	94.2	21.58	18.8644	86.59	92.0125	7.3125	118.343	81.2717	FALSE	TRUE	1	1	0	0	0	FALSE	b	0	393
YY019999	LYG	52.6324	F	CC	no	past	24.4561	0.810526	157.333	98.6667	2.68	6.3	1.62	11.443	682.19	9.74	5.54	98.7881	6.538	63.9	22.783	22.2648	100.565	152.275	7.415	136.705	85.3009	FALSE	TRUE	1	0	0	0	0	FALSE	b	1	394
YY020623	LYG	52.6242	F	CT	no	no	25.8761	0.857143	155.333	100	1.5	6.2	0.97	10.757	247.184	8.56	5.27	108.208	9.328	67.3	13.58	18.6096	114.765	98.2525	7.2175	134.252	85.4639	FALSE	FALSE	0	0	0	0	0	FALSE	b	0	394
YY020036	LYG	65.0322	F	TT	no	no	27.9707	0.908163	188.667	106	3.06	7.77	1.23	5.367	484.55	11.98	8.87	102.088	9.99	98.5	9.755	21.7797	125.922	114.868	12.07	126.44	72.8582	TRUE	FALSE	1	1	1	0	0	TRUE	a	1	395
YY020878	LYG	65.1307	F	CT	no	current	17.9089	0.775281	165.333	80	1.05	6.18	1.9	5.009	587.516	14.46	5.49	91.5744	7.491	48.8	11.315	21.4186	109.177	92.4825	8.8125	140.925	76.3212	FALSE	TRUE	1	1	0	0	0	FALSE	a	0	395
YY020186	LYG	60.0356	F	CT	no	no	34.7157	1.0283	185.333	116.667	2.86	8.58	1.27	7.941	855.094	14.29	10.31	77.6417	11.746	95.4	10.052	22.3156	123.907	99.885	9.5525	146.011	102.01	FALSE	TRUE	1	0	0	0	0	TRUE	a	1	397
YY020792	LYG	60.0356	F	CT	no	no	31.139	0.981308	188.667	98.6667	1.24	5.6	0.93	11.837	617.081	8.28	5.74	98.4741	7.95	48.1	8.243	20.505	98.29	97.24	6.325	161.802	95.4118	FALSE	TRUE	1	1	0	0	0	FALSE	a	0	397
YY020284	LYG	52.9008	M	TT	current	past	28.9341	1.02083	170	108	2.2	6.31	1.09	5.07	336.419	38.16	4.43	85.5424	7.446	74.7	19.149	20.9988	119.555	96.9675	9.37	130.667	84.6667	FALSE	TRUE	0	0	0	0	0	FALSE	a	1	398
YY020325	LYG	52.8077	M	CT	past	past	27.3438	0.978723	150	90	4.35	6.88	0.84	5.043	494.835	26.02	11.09	103.62	8.971	97.2	10.585	21.3285	78.65	105.035	8.25	132.298	89.1254	FALSE	TRUE	1	0	0	0	0	FALSE	a	0	398
YY020340	LYG	63.0938	M	CC	current	current	28.257	0.979167	147.333	89.3333	0.94	4.1	1.2	6.237	241.486	15.39	5.23	82.5547	9.122	94.2	14.406	22.3603	84.41	74.98	7.315	160	85.6667	FALSE	FALSE	1	1	0	0	0	FALSE	a	1	399
YY021301	LYG	63.1403	M	CC	past	current	28.699	0.909091	180	70	2.06	5.78	1.43	4.01	472.8	17.61	5.81	93.7128	12.46	111.9	14.74	20.5924	93.695	77.5475	8.935	150.104	67.9645	FALSE	TRUE	1	1	0	0	0	FALSE	a	0	399
YY020385	LYG	57.5962	M	TT	current	current	24.0346	0.94382	160.667	88.6667	1.27	5.01	1.73	6.543	356.115	12.22	5.82	103.373	11.162	96.4	11.294	20.4628	96.085	80.2975	6.935	133.214	75.6692	FALSE	FALSE	1	1	0	0	0	FALSE	a	1	400
YY020699	LYG	57.5688	M	CT	past	no	20.1771	0.945652	162	89.3333	2.08	7.01	0.94	3.428	536.126	27.89	4.4	83.8122	11.396	68	7.796	21.6571	93.415	87.5675	7.625	123.913	69.5922	FALSE	TRUE	0	0	0	0	0	FALSE	a	0	400
YY020392	LYG	72.5202	F	CC	no	no	24.2568	1.01205	160	80	2.95	6.59	1.64	5.664	576.039	9.32	5.82	89.1854	10.994	94.2	15.931	19.8241	125.127	132.917	9	118	78	FALSE	TRUE	1	1	0	0	0	FALSE	a	1	401
YY020616	LYG	72.4983	F	CT	no	no	18.369	0.849462	187.333	90	0.7	4.91	1.46	8.3	309.871	13.9	8.59	66.8785	8.577	53.5	8.203	23.2023	103.933	82.26	7.575	138.085	73.6222	FALSE	FALSE	1	1	0	0	0	FALSE	a	0	401
YY020451	LYG	57.065	M	TT	current	current	20.0288	1.07059	165.333	114.667	0.9	6.21	3.12	4.449	473.678	18.91	5.23	105.208	14.82	174.8	14.821	17.7355	81.8	94.0025	5.6025	147.337	96.7542	FALSE	FALSE	0	1	0	0	0	FALSE	a	1	402
YY020494	LYG	57.0732	M	CT	past	past	20.4152	0.865854	142.667	98	0.6	4.57	1.69	11.02	389.528	11.19	6.56	98.5734	7.203	90.5	9.575	21.0267	108.345	104.67	12.105	112.462	77.3978	FALSE	TRUE	0	1	0	0	0	FALSE	a	0	402
YY020503	LYG	58.1054	M	CT	current	no	21.551	0.894118	190.667	110	0.84	4.49	1.18	8.521	310.015	21.55	5.39	86.9655	4.623	78.3	5.455	22.3211	109.243	103.963	8.4075	130.667	90	FALSE	TRUE	1	0	0	0	0	FALSE	b	1	403
YY021471	LYG	57.974	M	CT	current	current	23.5294	0.912088	141.333	99.3333	0.68	5.28	1.54	6.696	332.797	12.93	5.39	98.7487	10.287	78	8.748	18.4199	100.127	87.53	8.515	122.406	84.4452	FALSE	FALSE	1	1	0	0	0	FALSE	b	0	403
YY020511	LYG	58.5763	M	CT	current	current	24.093	0.879121	206	120	0.94	5.73	1.76	5.064	414.645	17.76	6.34	95.2825	9.113	69.1	15.226	21.2958	89.2675	124.915	12.7575	166.693	103.715	FALSE	FALSE	1	1	0	0	0	FALSE	b	1	404
YY021557	LYG	58.5927	M	TT	current	current	22.0317	0.793814	168	101.333	1.53	4.99	1	15.032	440.788	20.42	4.81	104.295	5.678	59.3	13.004	18.6802	98.1975	78.2825	6.0425	121.807	78.6958	FALSE	FALSE	1	0	0	0	0	FALSE	b	0	404
YY020168	LYG	61.9466	F	TT	no	no	24.3232	0.858586	210	80	1.04	6.77	1.47	9.227	523.291	9.51	15.04	98.3749	4.711	67.2	15.883	17.9569	143.86	85.81	12.2325	147.61	72.9762	TRUE	FALSE	0	1	0	0	0	TRUE	a	0	405
YY020572	LYG	61.9192	F	CC	no	no	27.6304	0.949495	237.333	110	1.79	6.65	1.32	8.693	572.036	12.74	5.43	94.0237	12.63	70	13.67	22.8728	107.692	97.11	8.6975	159.722	82.7411	FALSE	TRUE	1	1	0	0	0	FALSE	a	1	405
YY020577	LYG	71.7344	F	CC	no	no	17.7778	0.928571	200.667	102.667	2.54	8.07	1.02	8.994	434.559	12.09	5.18	90.5948	9.818	68.5	15.226	19.7806	130.18	90.25	10.0475	141.174	82.5016	FALSE	TRUE	1	1	0	0	0	FALSE	a	1	406
YY021182	LYG	71.8029	F	TT	no	no	26.8116	0.817308	180	97.3333	3.44	6.27	1.13	9.325	1013.23	10.79	4.17	73.4339	12.829	95.8	16.175	19.0421	81.5925	96.6125	5.2925	131.3	78.2067	FALSE	TRUE	0	0	0	0	0	FALSE	a	0	406
YY019795	LYG	61.7577	M	CT	current	no	21.4619	1.02041	190.667	93.3333	0.94	4.72	1.17	7.18	476.158	11.97	4.76	76.9022	4.111	57.1	16.155	21.5665	105.22	87.6825	7.96	154.487	85.4165	FALSE	FALSE	1	1	0	0	0	FALSE	a	0	407
YY020584	LYG	61.7604	M	TT	current	current	22.6562	1.03571	194	93.3333	0.99	5.6	1.24	6.766	430.174	14.94	5.72	80.2712	10.506	97.7	24.604	22.366	100.252	91.435	8.6525	183.633	99.0539	FALSE	TRUE	1	1	0	0	0	FALSE	a	1	407
YY020624	LYG	71.4196	M	CT	no	no	24.6904	0.966667	180.667	98.6667	1.29	6.09	1.27	6.027	487.383	17.45	13.58	81.8811	9.449	86	16.732	19.0145	73.81	99.735	12.2125	137.108	76.9362	FALSE	FALSE	1	1	1	0	0	FALSE	a	1	408
YY021187	LYG	71.5373	M	CC	no	no	30.111	0.953704	183.333	90	2.3	5.15	0.89	7.941	380.241	15.71	9.64	88.2458	10.841	73	18.805	20.3198	72.925	92.7	6.5325	150.683	72.2585	FALSE	TRUE	1	0	1	0	0	FALSE	a	0	408
YY020647	LYG	67.5975	M	TT	no	no	25.5588	0.873786	160	90	1.74	5.15	1.14	5.951	320.238	16.96	5.76	90.2183	6.62	69.6	18.694	20.2782	110.328	82.6525	8.26	115.972	77.0178	FALSE	FALSE	0	0	0	0	0	FALSE	b	1	409
YY021026	LYG	67.6249	M	CC	current	current	25.8065	0.913043	210.667	100	1.01	5.42	1.56	5.596	540.254	14.06	4.54	97.2952	8.023	87.5	14.861	18.6325	89.3175	82.75	8.675	172.025	83.1604	FALSE	FALSE	1	1	0	0	0	FALSE	b	0	409
YY020749	LYG	58.1574	F	CT	no	no	25.8889	0.927083	170	98.6667	1.97	6.09	1.3	9.846	275.586	10.97	5.66	88.4432	9.608	85.8	14.258	21.2939	110.233	123.547	6.8725	139.391	81.6232	FALSE	TRUE	1	1	0	0	0	FALSE	a	1	410
YY020897	LYG	58.1081	F	CC	no	no	27.7662	0.85567	150.667	100	1.34	5.27	1.85	6.933	371.013	7.68	5.29	86.0989	9.519	70.5	9.387	16.3965	132.785	91.2075	9.5175	132.811	80.9964	FALSE	FALSE	1	1	0	0	0	FALSE	a	0	410
YY020740	LYG	69.4757	M	CC	current	current	33.2671	0.833333	150.667	70	2.78	5.93	0.98	9.704	287.552	11.52	7.26	69.5338	15.72	118.7	8.84	23.4226	97.675	132.548	8.145	134.194	62.5115	FALSE	TRUE	1	1	0	0	0	FALSE	a	0	411
YY020893	LYG	69.4209	M	CT	current	current	27.5134	0.915789	180	88	0.85	4.29	1.29	5.496	542.051	17.15	5.59	75.4477	4.436	56.7	13.431	19.0422	123.31	80.2775	7.3125	136.014	81.0339	FALSE	TRUE	1	1	0	0	0	FALSE	a	1	411
YY020930	LYG	53.8398	M	CT	current	current	24.6755	0.93617	202.667	110	1.19	5.13	1.5	4.798	457.608	13.23	6.2	104.395	6.065	55.7	15.91	21.4258	100.525	98.225	9.9475	143.845	95.0581	FALSE	FALSE	1	1	0	0	0	FALSE	a	1	412
YY021256	LYG	53.9001	M	CT	no	current	22.4323	0.855556	171.333	119.333	1.25	6.74	1.76	8.394	515.256	12	5.49	102.705	13.852	98.2	17.95	20.8379	92.5075	83.9775	7.895	130.693	72.2181	FALSE	TRUE	1	1	0	0	0	FALSE	a	0	412
YY020334	LYG	66.8145	M	CC	current	no	19.9594	0.817073	140.667	82.6667	0.97	4.2	1.17	6.551	265.423	13.9	5.23	89.5383	6.778	81.4	8.958	22.3952	109.853	102.035	7.58	128.12	82.7907	FALSE	FALSE	1	0	0	0	0	FALSE	a	0	413
YY021035	LYG	66.7077	M	CT	current	current	23.7387	0.905263	206.667	112	1.88	8.13	1.48	8.167	728.425	12.66	5.8	93.5877	11.418	104.9	14.566	20.8414	102.86	83.5225	9.0525	170.003	101.261	FALSE	FALSE	0	1	0	0	0	FALSE	a	1	413
YY020956	LYG	60.5914	M	CT	current	current	24.1288	0.895833	151.333	105.333	2.27	7.14	1.3	15.001	295.055	13.4	5.72	102.634	9.821	135	13.582	21.2773	107.838	104.728	8.0075	132.536	83.5973	FALSE	FALSE	1	1	0	0	0	FALSE	a	0	414
YY021109	LYG	60.6188	M	CT	past	past	27.7767	0.92	162.667	96.6667	1.48	5.28	1	12.471	335.891	14.42	6.44	76.1143	10.49	100.3	25.236	22.3767	105.875	90.44	9.1875	133	84.6667	FALSE	TRUE	1	1	0	0	0	FALSE	a	1	414
YY020059	LYG	55.948	F	CT	no	no	23.2335	0.877551	150.667	99.3333	1.36	6.14	1.67	4.52	479.801	17.84	4.7	81.5298	10.768	85.2	9.107	21.3457	151.295	81.6925	8.62	174.249	102.501	FALSE	TRUE	1	1	0	0	0	FALSE	b	0	415
YY021113	LYG	55.9726	F	CC	no	no	27.0552	0.885714	169.333	90	2.53	7.27	0.93	9.196	480.971	9.56	5.41	101.887	11.302	88.9	11.145	19.8602	108	91.145	8.4825	140.705	81.6308	FALSE	FALSE	1	1	0	0	0	FALSE	b	1	415
YY020888	LYG	67.7892	M	TT	current	no	23.6244	0.864583	158.667	91.3333	1.01	5.72	1.3	6.107	554.119	17.44	4.29	82.3025	7.198	77.9	14.978	19.5096	108.487	94.8225	6.2725	158.136	82.1157	FALSE	TRUE	1	1	0	0	0	FALSE	a	0	416
YY021155	LYG	67.6879	M	TT	current	no	26.2626	0.887755	177.333	106	1.48	6.49	1.17	5.502	410.6	37.32	6.04	68.7536	6.205	104.1	24.736	18.1498	104.38	94.26	8.95	153.324	86.2938	FALSE	TRUE	1	1	0	0	0	FALSE	a	1	416
YY020255	LYG	69.5661	M	TT	no	no	28.3039	0.868687	158.667	108	1.19	4.6	1.09	3.458	375.91	25.32	5.72	73.3771	2.433	78.9	15.38	20.9672	111.483	94.52	10.3725	130.853	82.7876	FALSE	TRUE	1	1	0	0	0	FALSE	b	0	417
YY021185	LYG	69.4784	M	CT	current	past	20.8611	0.840426	171.333	104	0.91	5.82	1.79	6.259	567.079	16.4	4.96	83.0052	9.863	68.3	10.379	19.944	99.98	85.9275	6.855	151.522	87.663	FALSE	TRUE	1	0	0	0	0	FALSE	b	1	417
YY020827	LYG	52.9637	F	CC	no	no	26.3465	0.918367	159.333	84.6667	1.89	6.72	1.29	8.345	411.826	11.95	6.25	105.454	12.687	71.1	13.484	21.6571	91.56	147.958	7.485	139.754	83.8766	FALSE	FALSE	1	1	0	0	0	FALSE	a	0	418
YY021291	LYG	52.9829	F	CC	no	no	23.7812	0.844444	180.667	90	1.87	6.48	1.12	14.664	347.025	10.91	5.44	108.464	9.5	99.3	12.727	19.5362	106.72	84.63	7.65	148.684	87.8466	FALSE	TRUE	1	0	0	0	0	FALSE	a	1	418
YY021288	LYG	60.7064	M	CC	past	past	26.079	0.926316	146.667	101.333	1.49	4.87	0.96	7.525	350.68	15.66	4.96	77.0661	8.515	67.9	19.349	19.3653	87.7275	77.6375	6.1025	130.815	84.8579	FALSE	TRUE	1	1	0	1	0	FALSE	a	0	419
YY021345	LYG	60.6626	M	CT	past	current	27.5312	0.891089	183.333	104.667	4.62	11.81	1.19	10.687	428.793	15.15	6.06	131.899	29.361	206.5	16.113	16.8091	105.828	96.1975	12.1375	143.491	78.7633	FALSE	TRUE	1	1	0	0	0	FALSE	a	1	419
YY021385	LYG	56.0383	F	TT	no	no	24.6904	0.876289	181.333	108	1.22	6.27	1.32	7.937	463.305	8.56	5.33	110.973	10.803	56.4	11.964	18.7417	118.793	96.0525	7.9475	138.19	85.7147	FALSE	FALSE	1	1	0	0	0	FALSE	a	1	420
YY021403	LYG	56.0329	F	CT	no	no	25.1039	0.887755	180	99.3333	1.42	5	1.38	10.289	404.898	12.99	6.29	64.8859	13.201	76.3	20.711	19.1867	119.61	87.1475	8.6575	128.935	76.9755	FALSE	TRUE	1	1	0	0	0	FALSE	a	0	420
YY020144	LYG	71.4196	M	CC	past	no	20.0692	0.910891	169.333	61.3333	3.73	5.85	1.1	9.092	491.841	12.04	10.55	95.8939	4.416	99.2	9.239	19.9028	112.177	112.248	9.985	143.86	73.321	FALSE	FALSE	1	1	0	0	0	FALSE	a	0	421
YY021420	LYG	71.4579	M	CC	no	no	20.1769	0.887755	190.667	70	0.64	5.24	1.81	5.076	362.474	14.37	5.8	61.4202	7.606	39	9.834	21.7747	128.463	84.1675	8.2275	138.535	70.2533	FALSE	FALSE	1	0	0	0	0	FALSE	a	1	421
YY021317	LYG	74.3573	F	TT	no	no	25.9695	0.887755	183.333	96	3	7.13	1.12	11.117	369.21	13.1	6.85	73.2491	14.644	116.9	13.947	19.6434	90.725	109.43	6.465	152.493	80.7961	FALSE	FALSE	1	1	0	0	0	FALSE	b	0	422
YY021458	LYG	73.692	F	TT	no	no	26.635	0.867347	210	93.3333	2.61	4.87	1.2	3.769	380.173	12.51	6.25	89.5209	8.962	89.1	9.061	19.4238	93.3375	83.865	8.735	160.998	97.6113	FALSE	TRUE	1	1	0	0	0	FALSE	b	1	422
YY021242	LYG	67.5373	M	CC	past	no	22.6003	0.870588	157.333	76.6667	1.29	4.82	1.33	5.85	630.956	16.19	4.71	83.2887	9.75	63.8	29.688	20.6855	77.4125	90.43	8.325	138.314	68.6474	FALSE	FALSE	0	0	0	0	0	FALSE	a	0	423
YY021535	LYG	67.6112	M	CC	past	past	26.9274	0.854369	186.667	100.667	1.3	6.01	1.07	7.387	368.802	16.04	6.76	90.8665	11.272	68.7	21.224	19.118	84.7425	79.0425	6.2275	154.965	80.0203	FALSE	TRUE	1	1	0	0	0	FALSE	a	1	423
YY021615	LYG	72.5996	F	CT	no	no	22.0492	0.8	186.667	102.667	0.72	5.4	1.47	4.613	463.667	10.2	6.3	91.3397	8.913	45.3	7.728	17.9539	96.87	100.455	5.61	148.57	81.2275	FALSE	TRUE	1	1	0	0	0	FALSE	a	1	424
YY022302	LYG	72.4654	F	CC	current	no	22.7731	0.826531	186.667	100	1.82	8.64	1.57	7.949	419.523	11.91	8.42	87.5032	13.066	90.8	17.352	21.7873	102.847	132.868	8.9725	141.622	81.0377	FALSE	FALSE	0	1	0	0	0	FALSE	a	0	424
YY021634	LYG	62.5024	F	CT	no	no	23.1385	0.873563	201.333	96	0.98	5.09	1.23	9.183	396.668	11.28	5.48	99.9934	9.446	71.4	18.834	18.7219	103.255	125.95	6.4825	128.505	77.6785	FALSE	FALSE	1	1	0	0	0	FALSE	a	1	425
YY022190	LYG	62.4668	F	TT	no	no	27.993	0.820755	204.667	106.667	5.85	4.09	0.92	7.989	441.3	10.77	8.11	99.42	9.447	92.9	18.15	20.2074	97.51	88.8775	8.7475	141.999	81.2104	FALSE	FALSE	1	1	0	0	0	FALSE	a	0	425
YY021764	LYG	73.9849	M	TT	no	no	28.8044	0.87963	156	90.6667	1.27	4.32	1.35	4.767	291.71	57.49	5.91	92.0121	7.49	26.2	3.604	18.5778	110.752	62.4625	4.01	123.463	80.0634	FALSE	TRUE	0	0	0	0	0	FALSE	a	1	426
YY022386	LYG	74.4559	M	CT	current	current	21.7738	0.865979	194	100	1.15	4.3	1.2	4.676	373.741	12.61	7.32	73.0238	4.801	79.4	13.52	22.5504	111.397	114.665	10.04	151.828	79.7574	FALSE	FALSE	1	1	0	0	0	FALSE	a	0	426
YY021782	LYG	60.5613	M	CC	past	past	28.7552	0.95	201.333	100	1.65	6.38	1.98	7.867	336.353	9.81	7.09	103.282	6.409	53.2	23.024	19.9152	124.282	83.6625	7.1725	146.502	87.0929	FALSE	FALSE	1	1	0	0	0	FALSE	a	1	427
YY022359	LYG	60.6516	M	CT	no	past	24.6094	0.826531	158	101.333	0.9	6.08	1.84	6.294	526.914	10.72	5.32	76.2947	5.413	51.9	20.051	19.781	76.5175	94.2625	7.6575	127.256	84.6546	FALSE	FALSE	1	1	0	0	0	FALSE	a	0	427
YY021614	LYG	52.6188	F	CT	no	no	25.204	0.787879	242.667	90	1.54	5.67	1.75	6.238	425.919	7.6	5.55	113.947	10.924	46.1	18.327	17.3014	94.095	129.968	6.8825	145.992	81.5837	FALSE	TRUE	1	1	0	0	0	FALSE	a	0	428
YY021811	LYG	52.6215	F	CC	no	no	26.0584	0.84375	190.667	103.333	1.43	6.56	1.37	7.246	348.321	10.31	5	109.991	7.941	56	14.104	19.6585	95.53	90.39	4.955	129.253	90.9534	FALSE	FALSE	1	1	0	0	0	FALSE	a	1	428
YY021822	LYG	69.8919	F	CT	no	no	21.4844	1.01	181.333	101.333	0.83	6.18	1.53	10.361	446.1	10.53	5.57	91.2791	9.802	47.8	19.033	18.2738	109.252	71.4075	4.27	161.902	86.9148	FALSE	FALSE	1	1	0	0	0	FALSE	a	1	429
YY022582	LYG	69.9658	F	TT	no	no	28.9901	0.852941	158.667	96.6667	1.08	6.6	1.3	8.09	533.539	19.06	5.35	91.1773	13.999	79.3	10.223	20.5799	90.1675	87.945	8.7025	148.35	88.2372	FALSE	FALSE	1	1	0	0	0	FALSE	a	0	429
YY021855	LYG	46.6776	F	TT	no	no	32.4661	0.834862	170	110	1.67	6.84	1.05	5.919	485.193	8.26	5.92	114.266	10.316	56.2	22.276	17.4749	110.418	79.4125	7.6575	161.905	94.8926	FALSE	FALSE	1	1	0	0	0	FALSE	a	1	430
YY022661	LYG	46.7652	F	TT	no	no	28.3039	0.873684	129.333	90	2.33	NA	1.04	5.07	389.81	21.47	NA	NA	9.496	61.7	19.616	18.4255	125.623	83.0275	8.8825	138.54	92.8846	FALSE	TRUE	0	0	0	0	0	FALSE	a	0	430
YY021952	LYG	59.9699	F	CC	no	no	34.4496	0.913043	142	90	3.48	6.29	1.01	8.403	380.231	11.6	12.39	103.634	9.881	63.2	10.213	17.5688	106.422	262.902	5.4575	145.977	84.2628	FALSE	TRUE	1	1	0	0	0	FALSE	a	1	431
YY022357	LYG	60.0082	F	CT	no	no	22.9398	0.836957	171.333	100	1.25	4.88	1.73	7.403	366.672	12.25	5.59	89.5969	7.825	65.2	18.635	19.918	85.4225	109.86	8.0475	137.382	83.5793	FALSE	FALSE	1	0	0	0	0	FALSE	a	0	431
YY021984	LYG	64.9062	M	CT	current	current	26.3465	0.9	163.333	102	0.99	7.22	1.17	5.771	366.053	16.68	5.32	89.8386	8.892	58.3	10.162	22.5788	105.105	90.1475	10.0825	149.938	97.0384	FALSE	FALSE	1	0	0	0	0	FALSE	b	1	432
YY022940	LYG	64.9144	M	CT	current	current	26.0262	0.865979	158.667	98.6667	1.56	5.95	1.1	5.827	588.089	13.66	5.51	95.5759	9.803	70.7	12.043	18.8242	66.3	115.487	6.42	141.173	79.3624	FALSE	FALSE	1	0	0	0	0	FALSE	b	0	432
YY021809	LYG	64.3587	M	TT	no	no	24.974	0.852273	162	100	1.99	6.92	1.34	4.253	321.685	35.43	5.35	97.5707	12.155	79.7	18.495	19.1783	92.4925	81.3025	7.475	131.069	79.887	FALSE	FALSE	0	1	0	0	0	FALSE	b	0	433
YY021992	LYG	64.3888	M	TT	current	current	28.5156	0.876289	182	78	1.26	4.71	1.23	7.132	365.588	27.56	6.27	93.5822	7.23	84.8	14.31	18.6753	71.4925	90.99	7.4275	132.667	70	FALSE	TRUE	1	1	0	0	0	FALSE	b	1	433
YY022032	LYG	47.729	F	CC	no	no	26.6667	0.824742	184	124.667	1.16	5.23	1.15	9.421	470.638	9.61	5.66	103.201	7.995	47.8	19.031	17.5639	97.97	89.15	7.165	163.921	110.253	FALSE	FALSE	0	1	0	0	0	FALSE	a	1	434
YY022328	LYG	47.6167	F	CT	no	no	18.9036	0.775281	140	96	0.9	4.1	1.44	9.731	512.467	8.14	4.98	108.383	7.045	31.5	17.856	18.1017	90.3875	77.1575	8.3925	112.014	76.636	FALSE	FALSE	0	0	0	0	0	FALSE	a	0	434
YY021663	LYG	73.1636	M	CT	current	current	24.1588	0.81	190	95.3333	1.46	6.84	1.72	6.266	323.512	18.34	6.28	68.6243	12.057	74.7	8.025	19.0812	109.39	79.26	5.4825	171.423	94.6805	FALSE	TRUE	1	1	0	0	0	FALSE	a	0	435
YY022038	LYG	73.1061	M	CC	current	current	21.0938	0.784091	205.333	90	1.04	5.76	1.75	10.214	668.438	14.45	5.21	89.1566	8.753	130.1	20.211	18.7352	94.4	89.055	6.9725	164.062	77.7243	FALSE	FALSE	1	1	0	0	0	FALSE	a	1	435
YY021996	LYG	56.0246	F	CT	no	no	30.0801	0.865385	169.333	100	1.85	6.4	1.15	17.13	486.5	8.29	6.02	104.091	10.908	65.2	14.018	20.4532	111.2	71.105	7.12	130.736	86.4602	FALSE	FALSE	1	0	0	0	0	FALSE	b	0	436
YY022109	LYG	55.8905	F	CT	no	no	28.9341	0.862385	178.667	100.667	NA	NA	NA	11.196	375.989	NA	NA	NA	15.525	98.6	13.656	16.2189	116.34	84.7	7.025	154.066	90.4304	FALSE	FALSE	1	1	0	0	0	FALSE	b	1	436
YY022166	LYG	65.8344	M	CC	no	current	30.4688	0.913462	192.667	90	NA	NA	NA	8.047	491.431	NA	NA	NA	9.631	68.7	11.957	21.198	89.3175	82.31	7.155	141.139	81.8145	FALSE	TRUE	1	1	0	0	0	FALSE	a	1	437
YY022640	LYG	65.911	M	TT	no	no	24.974	0.891304	163.333	98.6667	1.28	NA	1.31	5.625	298.781	15.73	NA	NA	7.177	57.8	19.74	20.0478	97.5225	100.9	9.2925	130.383	79.7658	FALSE	FALSE	1	0	0	0	0	FALSE	a	0	437
YY022239	LYG	70.8857	F	CT	no	no	23.9621	0.83871	240	111.333	2.88	6.59	1.48	4.772	274.965	17.62	7.01	87.8507	10.268	70.7	19.955	22.5329	124.127	133.09	7.18	166.519	83.559	FALSE	FALSE	1	1	0	0	0	FALSE	a	1	438
YY022983	LYG	70.7379	F	CC	no	past	29.9643	0.887755	160	80	3.8	6.38	0.99	4.555	565.151	9.73	6.41	92.8968	9.319	45.8	10.713	18.6396	140.965	102.5	9.21	133.846	75.6876	FALSE	FALSE	1	1	0	0	0	FALSE	a	0	438
YY021951	LYG	45.3361	F	CC	no	no	22.4766	0.769231	159.333	90	0.99	5.34	0.95	5.537	319.857	12.77	4.58	86.5194	8.252	67.7	14.517	19.3899	103.353	103.132	5.76	115.772	81.2546	FALSE	FALSE	1	0	0	0	0	TRUE	b	0	439
YY022261	LYG	45.2156	F	CT	no	no	23.5556	0.844444	180	109.333	1.4	7.48	1.55	9.459	430.013	10.77	21.67	111.353	12.7	72.6	12.251	17.4838	118.475	87.54	9.185	161.333	85.6667	FALSE	TRUE	1	1	0	0	0	FALSE	b	1	439
YY021880	LYG	64.6407	F	CC	no	no	22.1893	0.861386	175.333	98.6667	1.67	5.58	1.16	8.536	287.044	14.23	5.31	100.939	9.226	48.6	8.962	19.0026	92.5975	70.94	4.8275	131.942	84.4205	FALSE	FALSE	1	1	0	0	0	FALSE	b	0	440
YY022327	LYG	64.6708	F	CT	no	no	25.7812	0.918367	175.333	69.3333	1.28	6.04	1.55	9.112	435.72	12.58	5.36	79.3639	11.6	117.8	17.934	20.1262	88.3775	86.6875	8.7125	148.231	76.1243	FALSE	TRUE	1	0	0	0	0	FALSE	b	1	440
YY022291	LYG	53.013	F	CT	no	no	31.9805	0.811321	178.667	90	1.16	4.92	1.51	16.314	341.817	14.57	5.01	84.8052	11.171	36.8	13.429	21.4682	103.225	90.815	7.935	141.708	82.9335	FALSE	TRUE	1	0	0	0	0	FALSE	b	0	441
YY022402	LYG	53.0404	F	CT	no	no	29.0131	0.978261	172	104	1.29	5.58	1.09	8.189	577.308	9.33	6.45	102.144	10.755	76.4	18.33	20.4299	114.082	126.457	8.235	147.59	91.3443	FALSE	FALSE	1	1	0	0	0	FALSE	b	1	441
YY021842	LYG	66.5489	F	TT	no	no	25.7778	0.77451	158.667	90	0.95	5.47	1.99	5.978	856.801	12.26	6.04	94.07	9.021	37	10.409	17.8173	79.935	69.3175	5.115	137.561	81.8235	FALSE	FALSE	1	1	0	0	0	FALSE	b	0	442
YY022432	LYG	66.5407	F	CT	no	no	24.5949	1	184.667	119.333	NA	NA	NA	11.435	286.348	NA	NA	NA	8.633	61	14.624	19.0358	103.677	97.48	5.3375	143.423	97.8034	FALSE	TRUE	1	1	0	0	0	FALSE	b	1	442
YY021791	LYG	73.0787	M	CT	current	no	22.1003	0.827957	190	80	1.03	5.93	1.49	6.941	306.29	15.96	5.33	97.0827	7.905	27.4	14.003	18.5182	110.978	63.8225	6.2825	141.891	82.9167	FALSE	FALSE	1	1	0	0	0	FALSE	b	0	443
YY022435	LYG	73.1554	M	CT	current	current	24.7676	1	180	90	NA	NA	NA	9.862	314.226	NA	NA	NA	10.191	105.4	25.507	22.0228	95.15	104.362	8.3025	151.663	70.5568	FALSE	FALSE	1	1	0	0	0	FALSE	b	1	443
YY022455	LYG	65.3525	F	CT	no	past	26.0417	0.886364	210.667	120	NA	NA	NA	8.207	626.145	NA	NA	NA	8.288	50.3	9.361	22.481	115.897	93.08	10.83	164.484	95.6758	FALSE	TRUE	1	1	0	0	0	FALSE	a	1	444
YY022776	LYG	65.3388	F	CC	no	no	22.5586	0.813187	168	94.6667	1.61	6.08	0.91	5.976	325.207	10.58	6.54	93.1467	10.529	45.6	12.955	21.147	92.965	107.495	7.01	135.205	86.0594	FALSE	TRUE	1	0	0	0	0	FALSE	a	0	444
YY022563	LYG	72.3943	M	CT	current	no	18.6851	0.818182	156	78.6667	1.55	5.64	1.75	4.798	478.559	14.6	4.13	89.816	13.407	93.8	8.578	21.4833	107.338	99.56	8.83	125.673	72.7006	FALSE	FALSE	0	0	0	0	0	FALSE	a	1	445
YY022803	LYG	72.3422	M	CT	current	current	26.5731	0.90099	150	63.3333	1.64	4.78	1.38	4.014	410.866	12.46	5.35	87.1165	6.938	42.3	6.516	20.0946	96.5775	105.933	6.8375	133.068	64.8893	FALSE	FALSE	0	1	0	0	0	FALSE	a	0	445
YY021740	LYG	62.0287	M	TT	current	no	29.0945	0.951456	138	88.6667	1.34	5	1.17	4.871	503.175	39.83	9.74	80.8921	6.18	52.1	8.728	20.5575	94.4325	101.047	7.345	131.941	81.963	FALSE	TRUE	1	0	0	0	0	TRUE	a	0	446
YY022568	LYG	62.0315	M	CC	current	no	31.6443	1.06931	148	94	3.43	5.52	0.63	3.692	286.123	20.92	5.6	86.5731	4.115	62.8	13.435	21.9295	84.7125	101.925	6.48	129.333	90	FALSE	TRUE	1	0	0	0	0	FALSE	a	1	446
YY022335	LYG	52.7556	F	TT	no	no	25.2081	0.892473	170	90	1.85	5.46	1.25	9.421	345.04	11.68	6.62	103.39	6.92	67.1	27.928	18.6389	77.0475	100.965	6.8425	127.29	80.6429	FALSE	FALSE	0	0	0	0	0	FALSE	b	0	447
YY022610	LYG	52.6571	F	CC	no	no	30.2222	0.885714	189.333	100.667	1.67	NA	1.04	6.546	311.893	10.5	NA	NA	11.072	64.9	17.198	19.0267	124.228	95.62	7.9875	156.667	103	FALSE	TRUE	0	0	0	0	0	FALSE	b	1	447
YY022526	LYG	55.0938	M	CT	no	current	27.0641	0.852941	179.333	103.333	1.82	5.36	1	9.348	544.688	14.85	5.41	104	10.674	98.1	20.826	20.6122	67.5475	125.282	9.405	130.439	79.0101	FALSE	TRUE	1	0	0	0	0	FALSE	a	0	448
YY022636	LYG	55.258	M	CT	past	no	22.3081	0.872549	220	110	1.54	NA	1.23	6.164	323.974	14.32	NA	NA	11.306	65	20.123	21.9611	75.3375	120.41	7.275	147.147	86.7723	FALSE	TRUE	1	1	0	0	0	FALSE	a	1	448
YY021763	LYG	53.6427	F	CT	no	no	27.3556	0.828571	160.667	91.3333	3.02	7.78	1.88	8.355	311.838	8.98	4.95	106.129	14.197	51.8	15.996	20.7928	86.77	110.573	7	129.608	75.9144	FALSE	FALSE	0	0	0	0	0	FALSE	b	0	450
YY022662	LYG	53.6372	F	CT	no	no	24.2188	0.904255	152.667	94	1.31	NA	1.63	9.961	1736.05	9.61	NA	NA	12.521	43.9	20.437	19.9413	89.0025	95.8525	6.8325	158.831	87.473	FALSE	TRUE	0	0	0	0	0	FALSE	b	1	450
YY022292	LYG	59.2444	M	TT	no	no	28.9062	0.989691	164.667	106.667	1.69	3.35	0.79	4.622	388.915	43.37	4.89	86.8922	7.61	92.2	17.799	21.688	100.312	116.63	8.905	128.73	86.0888	FALSE	TRUE	0	0	0	0	0	FALSE	b	0	451
YY022695	LYG	59.206	M	TT	current	no	24.4956	0.869565	178	100	0.68	NA	1.29	6.05	502.873	14.52	NA	NA	13.624	62.3	15.461	23.5835	86.0225	101.767	9.05	142.062	80.9775	FALSE	TRUE	1	1	0	0	0	FALSE	b	1	451
YY021635	LYG	61.3717	F	CT	no	no	31.36	0.855422	154.667	76	1.26	6.44	1.87	11.474	460.956	9.6	14.93	84.7553	12.197	89.4	15.997	19.6521	108.843	80.67	9.1975	133.672	71.8385	FALSE	FALSE	0	0	0	0	0	TRUE	b	0	452
YY022709	LYG	61.4675	F	TT	no	no	28.5075	0.920792	165.333	110.667	0.87	NA	1.31	9.476	343.863	12.12	NA	NA	10.689	114.4	37.194	20.1577	121.257	86.7525	8.095	144.487	87.4925	FALSE	FALSE	1	0	0	0	0	FALSE	b	1	452
YY022322	LYG	74.2478	M	CT	past	past	23.7118	0.957447	189.333	110	1.63	5.45	1.04	4.057	407.016	18.66	6.3	85.489	7.248	57.6	20.085	19.2735	88.905	89.5	6.605	134.086	80.9838	FALSE	FALSE	1	1	0	0	0	FALSE	b	0	453
YY022781	LYG	74.0671	M	TT	no	no	26.5731	0.96875	192	100	1.18	4.93	1.43	5.816	367.537	13.73	9.14	52.9879	11.887	54.7	13.022	21.4984	89.285	84.525	8.36	147	86	FALSE	FALSE	0	0	0	0	0	FALSE	b	1	453
YY022165	LYG	62.7899	M	CT	current	no	23.0112	0.804348	159.333	93.3333	NA	NA	NA	3.023	395.392	NA	NA	NA	6.579	49.7	19.111	19.8028	67.44	90.4375	7.4525	123.653	77.8293	FALSE	TRUE	1	0	0	0	0	FALSE	a	0	454
YY022783	LYG	62.8145	M	TT	no	no	25.7344	0.968421	180.667	111.333	0.9	5.97	1.61	3.166	293.156	47.97	5.1	83.0674	7.297	35	27.983	19.8954	94.595	99.8875	7.1275	140.667	95.3333	FALSE	TRUE	1	0	0	0	0	FALSE	a	1	454
YY022821	LYG	51.6879	F	TT	no	no	28.3039	0.803738	179.333	100.667	1.35	8.01	1.23	11.139	699.126	12.87	7.91	88.4812	11.339	62.5	16.009	20.2208	86.3875	108.485	6.78	147.658	87.3416	FALSE	TRUE	1	1	0	0	0	FALSE	b	0	455
YY022905	LYG	51.7563	F	TT	no	current	26.6667	0.821053	150	100	1.55	5.67	2.06	7.103	355.427	13.47	5.39	106.011	8.161	33.3	8.927	21.2908	99.9325	89.73	8.2075	153.893	94.6395	FALSE	FALSE	1	1	0	0	0	FALSE	b	1	455
YY022561	LYG	61.3771	F	TT	no	no	27.5556	0.934783	162.667	100.667	1.56	4.09	0.81	6.87	323.087	15.01	9.37	75.9011	11.209	168.9	11.277	20.4524	88.8725	89.7325	7.6825	146.836	81.8023	TRUE	TRUE	1	1	1	0	0	FALSE	a	0	456
YY022924	LYG	61.358	F	TT	no	no	24.653	0.811111	187.333	108.667	1.05	5.02	1.64	7.009	343.917	12.6	4.33	97.0344	11.929	18.1	12.346	17.548	90.315	142.618	6.54	156.861	90.4997	FALSE	FALSE	1	1	0	0	0	FALSE	a	1	456
YY022053	LYG	52.3669	F	CT	no	no	22.9398	0.793478	218.667	100	1.04	5.81	1.63	5.158	674.775	7.74	5.42	105.829	11.964	79.2	12.373	19.7354	100.332	88.4525	6.3525	146.527	86.6394	FALSE	FALSE	1	1	0	0	0	FALSE	b	0	457
YY022949	LYG	52.3614	F	CT	no	no	24.6669	0.808511	262.667	130.667	1.2	6.51	1.74	7.707	347.744	10.36	5.43	106.384	9.242	42.7	20.506	15.1257	104.347	92.4375	6.425	203	118.333	FALSE	TRUE	1	1	0	0	0	FALSE	b	1	457
YY023051	LYG	71.6194	F	CT	no	no	23.2834	0.817204	196	94	2.12	5.08	0.93	4.654	318.651	13.11	5.26	89.8574	10.54	36.9	24.366	19.4461	103.055	107.733	6.59	182.807	76.1069	FALSE	FALSE	1	1	0	0	0	FALSE	a	1	458
YY023653	LYG	71.7755	F	CT	no	past	18.4202	0.802469	193.333	90	0.8	5.06	1.95	5.223	460.16	11.33	5.38	87.3033	8.975	49.4	14.561	23.2615	127.567	114.58	11.1725	138.225	72.6148	FALSE	TRUE	1	1	0	0	0	FALSE	a	0	458
YY023073	LYG	53.295	M	TT	current	current	29.9116	0.94898	228.667	130	1.81	6.65	1.37	8.016	305.257	16.19	5.59	94.5222	10.416	72.3	16.925	17.9593	66.995	91.2075	6.9025	139.983	94.0523	FALSE	FALSE	1	1	0	0	0	FALSE	a	1	459
YY023131	LYG	53.5359	M	TT	no	no	23.2434	0.923913	122	89.3333	0.92	5.32	1.29	16.93	499.738	13.78	6.21	98.2395	9.486	54.2	38.727	18.5404	79.52	110.737	7.39	124.962	79.4839	FALSE	TRUE	1	0	0	0	0	FALSE	a	0	459
YY023069	LYG	68.0849	F	CT	no	no	30.4878	0.972222	220.667	110	2.74	4.92	1	7.925	342.544	15.97	6.31	89.9393	11.177	52.9	20.369	17.8368	73.43	161.468	7.305	181.1	92.2032	FALSE	TRUE	0	1	0	0	0	FALSE	b	0	460
YY023074	LYG	68.1396	F	TT	no	no	28.441	0.902913	180	86.6667	2.29	6.95	1.37	4.499	332.637	14.68	5.88	87.2319	12.417	60.9	19.777	20.2739	108.22	110.25	7.03	144.378	77.6028	FALSE	TRUE	1	0	0	0	0	FALSE	b	1	460
YY023083	LYG	68.3669	M	TT	current	current	20.0046	0.788235	142.667	76	1.52	5.05	1.35	7.714	651.646	12.09	5.15	90.3346	13.008	38.2	22.872	19.9889	83.085	132.778	6.4425	148.462	81.7041	FALSE	TRUE	0	1	0	0	0	FALSE	a	1	461
YY023807	LYG	68.3614	M	CT	current	current	23.4337	0.875	200.667	88	0.78	5.08	1.39	14.885	784.26	12.36	7.86	91.0067	8.508	69.1	22.58	20.7728	109.71	72.9075	9.5325	146.192	75.9837	FALSE	FALSE	1	1	0	0	0	FALSE	a	0	461
YY023149	LYG	71.1184	F	TT	no	no	17.8536	0.716049	174	105.333	2.11	6.83	2.1	3.929	319.433	22.19	5.23	85.4255	13.463	69.4	9.476	20.8494	131.243	83.82	8.3375	158.31	88.4378	FALSE	FALSE	1	1	0	0	0	FALSE	a	1	462
YY023696	LYG	71.091	F	CT	no	no	28.3987	0.895238	198	120.667	1.57	5.51	0.98	13.189	332.594	13.98	7.35	87.9154	10.183	58.7	21.895	19.3636	104.427	89.64	9.385	155.093	94.9811	FALSE	FALSE	1	1	0	0	0	FALSE	a	0	462
YY023061	LYG	55.822	M	CC	current	no	28.2138	0.887755	160	90	1.08	4.64	1.08	5.955	381.288	12.88	5.3	86.2738	8.31	35.9	21.195	20.278	75.0725	83.005	5.9775	135.607	79.7991	FALSE	TRUE	1	1	0	0	0	FALSE	a	0	463
YY023152	LYG	55.9562	M	CC	current	no	24.8591	0.927083	161.333	111.333	1.28	5.6	1.04	4.389	592.535	13.54	5.33	75.8837	8.765	46.7	31.669	19.0063	135.903	87.2375	8.03	164.575	89.4163	FALSE	TRUE	1	1	0	0	0	FALSE	a	1	463
YY023159	LYG	58.3272	M	CC	no	no	26.8544	0.893204	160	108	3.05	7.34	1.01	6.848	326.756	11.57	5.45	98.2175	17.067	75.9	26.408	16.5506	60.905	432.025	6.98	132.1	87.8623	FALSE	TRUE	1	1	0	0	0	FALSE	a	1	464
YY023261	LYG	58.1629	M	CT	no	no	25.8264	0.891089	160	107.333	1	NA	1.04	10.756	281.786	NA	NA	NA	5.099	36.7	22.886	17.7003	68.8175	92.535	6.0825	145.344	93.0835	FALSE	TRUE	1	0	0	0	0	FALSE	a	0	464
YY023233	LYG	73.0103	F	CC	no	no	22.4444	0.831461	160	99.3333	1.87	5.59	1.27	7.215	851.283	8.67	7	80.5665	9.207	52.4	14.4	20.0876	107.65	73.48	6.6775	153.891	85.7663	FALSE	FALSE	1	1	0	0	0	FALSE	a	1	466
YY023713	LYG	72.8296	F	TT	no	no	25.4459	0.88172	200	80	2.2	7.08	1.4	5.728	291.039	28.99	5.89	89.8461	9.026	62.8	12.547	21.1593	126.225	100.507	9.1725	166.235	86.5842	FALSE	TRUE	1	1	0	0	0	FALSE	a	0	466
YY023234	LYG	71.3238	M	CC	no	current	20.727	0.963415	180	88	1.71	4.77	1.29	6.27	412.578	14.78	6.98	86.9801	7.176	85.2	39.741	18.2912	82.78	92.0225	6.6925	120.667	60.6667	FALSE	FALSE	1	0	0	0	0	FALSE	a	1	467
YY023329	LYG	71.1622	M	CC	past	past	24.7934	0.967033	158.667	86.6667	1.76	5.04	1.45	9.873	410.721	9.01	6.11	91.1404	6.121	58.9	24.741	17.583	70.575	116.097	7.1675	135.945	78.4946	FALSE	TRUE	1	0	0	0	0	FALSE	a	0	467
YY023242	LYG	63.2252	M	CT	current	current	28.306	0.98	182.667	100	1.39	6.67	1.91	10.466	427.065	16.12	7.36	85.4769	10.9	71.1	9.446	20.3099	103.513	115.683	12.355	141.904	88.0322	FALSE	TRUE	1	0	0	0	0	FALSE	a	1	468
YY023550	LYG	63.1403	M	TT	current	current	28.7109	0.978261	178	100	1.32	5.26	1.46	6.245	1084.98	11.04	6.46	96.8334	7.833	76.2	25.498	21.5797	98.7225	91.37	9.84	152.376	88.2393	FALSE	FALSE	1	1	0	0	0	FALSE	a	0	468
YY023244	LYG	70.5051	M	TT	no	current	20.4491	0.784091	167.333	84.6667	1.25	4.66	1.43	5.29	365.946	12.67	13.84	96.1832	6.841	35.7	9.194	17.3639	106.668	98.4075	6.7775	142.208	75.4528	FALSE	FALSE	1	1	0	0	0	FALSE	a	1	469
YY023310	LYG	70.5352	M	CT	current	current	24.4646	0.946809	180	108	1.75	4.44	0.86	2.649	445.819	17.85	6.42	103.491	3.465	48.8	9.3	21.9344	117.688	110.595	8.29	154.367	92.0397	FALSE	FALSE	1	1	0	0	0	FALSE	a	0	469
YY023248	LYG	71.2991	M	CC	past	past	23.7118	0.933333	195.333	76	1.34	NA	1.46	7.855	919.845	NA	NA	NA	11.725	100.2	23.194	19.8627	119.79	101.33	8.23	159.924	61.8464	FALSE	TRUE	1	1	0	0	0	TRUE	b	1	470
YY023829	LYG	71.6879	M	CT	past	no	20.7756	0.938272	168	84	0.76	5.1	1.53	6.31	921.525	23.15	5.35	85.9747	11.383	52.7	33.69	18.7212	52.7725	70.9925	9.69	134.632	73.3912	FALSE	FALSE	1	1	0	0	0	FALSE	b	0	470
YY023251	LYG	56.1889	M	CC	past	past	33.4622	1.02804	190	110	2.06	NA	0.95	5.862	392.225	NA	NA	NA	6.914	71.2	17.294	22.2922	83.295	108.855	8.6675	149.333	90	FALSE	FALSE	1	1	0	0	0	FALSE	b	1	471
YY023586	LYG	56.3559	M	CC	no	current	21.0797	0.880952	142	84	1.06	4.45	1.15	10.498	323.559	8.39	7.16	111.315	7.216	44.2	19.69	22.482	119.013	108.478	8.8275	136.568	89.7444	FALSE	FALSE	0	0	0	0	0	FALSE	b	0	471
YY023257	LYG	68.8953	M	CC	no	current	24.1965	0.964706	180.667	81.3333	1.21	NA	1.67	7.243	368.865	NA	NA	NA	7.236	61.3	14.437	20.6517	92.1525	96.3275	7.75	146.873	73.1245	FALSE	FALSE	1	0	0	0	0	FALSE	b	1	472
YY023502	LYG	69.1581	M	TT	past	past	29.9054	0.947917	192.667	120	3.13	6.67	1.32	NA	NA	34.23	5.66	86.4803	9.952	86.7	10.584	21.246	113.755	105.795	6.0475	152.549	86.525	FALSE	TRUE	1	1	0	0	0	FALSE	b	0	472
YY023267	LYG	60.345	F	CT	no	no	33.7838	0.950495	226.667	132	2.29	5	0.83	7.724	215.335	17.26	5.29	76.8329	6.749	57.5	12.208	16.193	107.323	83.8375	3.4675	184.667	104	FALSE	TRUE	1	1	0	0	0	FALSE	b	1	473
YY023574	LYG	60.3012	F	TT	no	no	33.0559	0.971154	162	93.3333	1.7	5.34	1.38	8.64	621.656	9.85	5.96	102.812	6.594	41.6	7.696	22.5042	91.665	93.0025	8.9325	130.789	81.048	FALSE	FALSE	1	1	0	0	0	FALSE	b	0	473
YY023270	LYG	61.128	F	CT	no	no	23.6013	0.886364	174.667	84.6667	1.23	5.3	1.02	9.678	383.655	8.87	5.97	98.3852	5.942	37.1	6.766	25.1395	140.915	141.322	9.3325	132.881	71.1893	FALSE	TRUE	0	1	0	0	0	FALSE	b	1	474
YY023304	LYG	61.1006	F	CC	no	no	24.8889	0.910112	205.333	94	0.93	3.82	1.47	10.118	547.125	7.96	6.8	97.6806	6.721	38.5	17.018	20.3117	131.507	95.8525	7.7175	135.359	78.747	FALSE	FALSE	1	1	0	0	0	FALSE	b	0	474
YY023314	LYG	65.2402	M	TT	current	past	31.5102	0.964286	212	118	2.78	2.32	0.9	8.41	837.445	26.99	3.59	132.794	9.804	68.6	22.932	22.1937	105.04	107.18	8.1575	147.153	87.51	FALSE	TRUE	1	1	0	0	0	FALSE	b	1	475
YY023476	LYG	65.2129	M	CT	no	current	23.6509	0.885057	152.667	78.6667	0.72	3.73	1.34	8.315	254.679	13.61	6.02	97.9236	7.642	71.7	25.351	16.9278	72.69	81.0875	5.49	136.648	77.2213	FALSE	FALSE	1	0	0	0	0	FALSE	b	0	475
YY023321	LYG	48.8597	M	CT	past	past	25.4327	0.938776	171	128.667	1.11	6	0.91	7.994	253.565	20	5.24	101.52	7.756	62	16.556	19.944	76.995	92.8675	5.9425	150	90	FALSE	TRUE	1	1	0	0	0	FALSE	a	1	476
YY023646	LYG	48.7639	M	CT	no	past	27.3909	0.909091	180	100	1	5.11	1.29	5.673	409.307	10.8	9.33	109.989	8.657	94.4	27.21	20.216	70.245	115.138	7.1425	128.066	79.4121	FALSE	FALSE	1	1	1	0	0	TRUE	a	0	476
YY023323	LYG	56.4326	M	CT	no	no	23.1911	0.921348	168	89.3333	2.67	4.31	0.95	9.582	500.063	6.91	16.38	133.749	10.246	69.6	16.965	16.3836	94.7025	104.082	8.995	132.667	81.6667	TRUE	FALSE	0	0	0	0	0	TRUE	a	1	477
YY023680	LYG	56.4928	M	TT	current	current	19.9219	0.924051	179.333	98.6667	3.96	7.39	1.52	NA	NA	14.94	5.45	127.391	14.085	251.3	13.43	18.7061	102.463	193.655	8.1575	153.731	87.5687	FALSE	FALSE	1	0	0	0	0	FALSE	a	0	477
YY023250	LYG	55.0691	F	CC	no	no	29.0487	0.90099	176	106.667	3.41	5.41	0.93	4.557	445.492	8.65	8	110.587	12.988	59.5	17.388	20.6156	94.19	106.86	9.4325	139.096	88.7159	FALSE	FALSE	1	1	0	0	0	FALSE	b	0	478
YY023361	LYG	55.0664	F	CT	no	no	25.3203	0.896552	138	70	2.81	6.63	1.25	7.074	448.633	13.27	5.5	90.8846	8.5	88.5	26.663	29.2031	164.255	172.93	13.8375	136.714	81.7046	FALSE	TRUE	1	1	0	0	0	FALSE	b	1	478
YY023238	LYG	58.8501	M	CT	current	current	27.6361	0.942308	206	119.333	2.09	5.79	1.05	5.242	455.906	15.49	7.33	86.6354	7.845	69	20.172	22.6575	121.65	89.7475	8.5275	125.909	78.054	FALSE	FALSE	1	0	0	0	0	FALSE	b	0	484
YY023459	LYG	58.7899	M	CT	current	current	23.9188	0.903226	147.333	104	2.03	NA	1.48	NA	NA	NA	NA	NA	6.285	63.2	10.934	23.501	94.8175	115.1	7.455	146.143	90.6831	FALSE	TRUE	1	1	0	0	0	FALSE	b	1	484
YY023367	LYG	59.8412	F	TT	no	no	26.7405	0.898876	144	95.3333	0.77	6.73	2.99	7.194	324.962	17.62	5.67	75.973	6.625	32.6	21.011	19.9987	124.168	82.565	8.5	129.961	84.0619	FALSE	TRUE	0	1	0	0	0	FALSE	b	0	485
YY023480	LYG	59.8522	F	TT	no	no	23.8054	0.88172	154	98	0.9	5.52	1.37	5.704	314.143	9.43	5.13	75.9671	8.231	25.7	33.494	26.5274	177.972	107.77	11.0075	132.456	86.3098	FALSE	TRUE	1	1	0	0	0	FALSE	b	1	485
YY023525	LYG	56.0055	M	TT	current	current	23.7024	0.869565	170.667	91.3333	2.09	5.03	1	11.086	409.263	11.39	9.97	96.6017	10.332	107.6	27.539	19.8697	98.6225	101.16	8.3275	131.923	85.0238	FALSE	TRUE	1	1	1	0	0	FALSE	a	1	486
YY023666	LYG	55.9343	M	CC	current	current	19.8141	0.865854	171.333	96.6667	2.06	NA	2.27	12.335	988.116	NA	NA	NA	13.505	190.5	17.834	22.7106	135.38	102.85	10.2675	145.804	89.0598	FALSE	FALSE	1	1	0	0	0	FALSE	a	0	486
YY023556	LYG	50.7433	F	CT	no	no	33.9836	0.959184	196	110	2.05	5.89	1.39	10.504	396.933	5.76	5.2	119.466	10.991	59.1	7.495	18.4079	105.9	107.145	7.44	155.333	87	FALSE	TRUE	1	1	0	0	0	FALSE	b	1	487
YY023820	LYG	50.8255	F	CT	no	no	22.3133	0.885417	160.667	89.3333	0.48	4.16	1.32	12.932	485.211	10.85	5.42	97.3894	10.251	68.6	11.493	23.6471	130.59	109.79	11.97	137.408	86.5368	FALSE	TRUE	0	0	0	0	0	FALSE	b	0	487
YY023684	LYG	66.9651	F	CT	no	no	24.7796	0.906977	200.667	98.6667	0.84	4.02	1.3	13.305	239.663	10.39	6.06	89.9632	9.641	99.7	28.13	21.8014	119.207	97.0075	8.7225	149.333	70.6667	FALSE	FALSE	1	1	0	0	0	FALSE	b	1	490
YY023772	LYG	66.9514	F	CT	no	no	26.1742	0.904255	162.667	70	1.24	6.1	1.88	11.872	378.465	7.91	5.66	86.465	14.157	68.8	17.375	20.5358	115.485	102.362	8.0625	130.365	82.0017	FALSE	TRUE	0	0	0	0	0	FALSE	b	0	490
YY023681	LYG	68.0794	F	TT	no	no	21.7778	0.963855	170.667	100	1	5.83	1.09	12.261	441.922	8.58	6.21	92.3386	8.81	53.5	11.09	21.5779	138.278	108.573	8.495	132.631	87.5389	FALSE	TRUE	1	1	0	0	0	FALSE	a	0	491
YY023688	LYG	67.9535	F	TT	no	no	26.2509	0.957447	210.667	100	1.09	NA	1.05	18.212	334.046	NA	NA	NA	12.05	66.9	17.749	19.7603	101.433	80.7975	7.5775	148.203	78.815	FALSE	FALSE	1	1	0	0	0	FALSE	a	1	491
YY023185	LYG	65.6153	M	TT	current	current	18.7305	0.841463	160	91.3333	0.97	5.73	1.26	3.994	282.28	55.53	5.16	77.4918	9.436	44.5	9.386	18.9088	97.5225	83.3825	6.2725	127.958	78.7371	FALSE	FALSE	1	0	0	0	0	FALSE	b	0	492
YY023709	LYG	65.6783	M	TT	current	no	23.7954	0.930233	190	110	1.26	5.21	1.04	5.72	231.668	29.27	5.68	91.5442	11.524	81	21.006	19.6364	103.938	89.4925	7.3975	138.458	87.8509	FALSE	FALSE	1	0	0	0	0	FALSE	b	1	492
YY023322	LYG	59.4059	M	CT	past	current	25.3444	0.967742	179.333	100	1.1	5.83	1.42	9.517	413.971	9.28	10.37	98.1054	8.769	46.7	14.981	21.0417	104.515	98.9425	7.5425	129.388	77.3811	TRUE	TRUE	1	1	0	0	0	TRUE	b	0	493
YY023742	LYG	59.4853	M	CT	current	current	26.4463	0.9375	198.667	140	2.73	7.16	1.33	NA	NA	9.02	5.38	110.948	8.326	130.3	14.729	24.4049	127.97	104.993	8.82	140.326	95.597	FALSE	FALSE	1	1	0	0	0	FALSE	b	1	493
YY023859	LYG	60.8898	M	CT	current	current	24.0055	0.964706	162	81.3333	1.4	5.88	1.55	5.226	174.331	24.28	6.64	94.5711	11.788	133.2	15.335	19.4369	98.62	84.145	6.47	154.977	70.9268	FALSE	FALSE	1	1	0	0	0	FALSE	b	1	494
YY023943	LYG	60.9528	M	CC	current	current	24.3418	0.810526	152.667	86	1.69	5.54	1.6	5.791	466.645	12.86	6.77	93.3522	7.658	101.4	24.245	19.3177	92.4225	97.9175	9.8875	134.054	77.5691	FALSE	FALSE	1	1	0	0	0	FALSE	b	0	494
YY023864	LYG	58.0342	F	CT	no	past	22.4444	0.855556	150	86	0.79	4.94	1.21	7.779	381.807	9.53	5.59	100.298	9.65	84.5	14.338	20.9453	109.54	90.31	9.085	120	76.6667	FALSE	TRUE	1	1	0	0	0	FALSE	a	1	495
YY024749	LYG	57.9877	F	CT	no	no	25.821	0.896907	143.333	70	2.68	4.64	1.43	8.574	446.526	6.61	5.48	109.552	12.24	56.8	10.81	19.4981	121.01	108.335	7.2675	133.605	75.697	FALSE	TRUE	1	0	0	0	0	FALSE	a	0	495
YY023881	LYG	70.9295	M	TT	no	current	23.858	0.967033	188	100	0.68	4.79	1.48	10.13	957.095	11.3	6.19	93.5258	7.268	82	16.79	19.751	102.32	101.515	9.02	147.374	85.8316	FALSE	FALSE	1	1	0	0	0	FALSE	a	1	496
YY024692	LYG	71.1184	M	CT	current	no	23.7954	0.865169	144.667	80.6667	0.74	3.44	1.14	5.52	296.688	12.95	5.73	91.1135	6.89	68.4	11.665	15.2212	98.285	89.865	3.4325	135.479	82.9006	FALSE	TRUE	1	1	0	0	0	FALSE	a	0	496
YY023884	LYG	64.6242	M	CT	no	no	23.833	0.855556	238.667	96	1.61	5.53	1.12	7.09	319.407	9.38	5.51	98.3294	14.021	89.1	25.454	19.3092	42.34	106.252	7.685	186.515	81.9693	FALSE	TRUE	1	1	0	0	0	FALSE	a	1	497
YY024145	LYG	64.627	M	CC	past	past	24.3418	0.957447	153.333	80	1.09	4.62	1.52	22.061	888.188	8.91	5.79	98.2003	9.769	71.5	17.161	24.3526	209.555	96.8025	11.4875	148.034	81.3448	FALSE	FALSE	0	0	0	0	0	FALSE	a	0	497
YY023952	LYG	66.8912	F	TT	no	no	24.1608	0.913043	181.333	110.667	0.93	4.62	1.2	6.59	1012.68	11.08	4.9	90.7465	2.977	82.9	23.414	21.6523	101.203	107.615	8.31	128	75	FALSE	TRUE	1	1	0	0	0	FALSE	b	1	498
YY024954	LYG	66.7789	F	CT	no	no	23.2816	0.901099	165.333	85.3333	2.15	3.92	1.82	9.735	1043.61	7.66	5.44	95.3335	10.064	43.5	14.914	19.9894	93.4875	108.67	7.485	131.87	77.0809	FALSE	TRUE	1	1	0	0	0	FALSE	b	0	498
YY024022	LYG	65.4702	M	TT	current	no	26.6934	0.989691	161.333	80.6667	0.96	5.05	1.21	5.327	457.2	18.91	7.36	74.3348	10.02	60.5	16.886	19.461	103.453	76.94	10.09	148.897	82.7179	FALSE	FALSE	1	0	0	0	0	FALSE	b	1	499
YY024703	LYG	65.3224	M	CT	current	no	24.0484	0.895833	154.667	94.6667	1.13	5.85	1.43	8.731	392.336	11.78	5.35	91.7734	11.952	104.6	29.04	22.0285	148.398	188.192	12.6	133.597	80.8405	FALSE	TRUE	0	0	0	0	0	FALSE	b	0	499
YY024023	LYG	62.4613	F	CT	no	no	30.4811	0.927835	180.667	84.6667	1.48	5.04	1.32	14.382	365.287	8.85	6.19	99.1625	6.893	52.5	12.293	24.826	108.245	123.775	10.645	131.029	74.5365	FALSE	TRUE	1	0	0	0	0	FALSE	a	1	500
YY024638	LYG	62.4723	F	CT	no	no	28.1969	0.907407	179.333	95.3333	1.71	5.58	1.65	9.293	206.765	17.24	4.98	76.0706	11.244	88.2	12.125	22.0714	117.985	86.56	9.5225	110.667	70.6667	FALSE	TRUE	0	0	0	0	0	FALSE	a	0	500
YY024053	LYG	55.9754	F	CT	no	no	27.2633	0.919192	174.667	84	4.67	8.79	1.16	5.954	220.252	11.25	8.1	113.06	10.23	91.6	15.079	28.4515	139.94	137.803	13.0225	138.062	83.8441	FALSE	FALSE	1	1	0	0	0	TRUE	a	1	501
YY025072	LYG	56.0137	F	TT	no	no	22.9038	0.865169	161.333	82	1.18	4.18	1.3	4.966	219.483	10.26	4.98	108.682	8.337	55.8	15.97	20.8137	115.41	95.2875	6.89	137.977	84.4136	FALSE	FALSE	1	0	0	0	0	FALSE	a	0	501
YY023975	LYG	61.6208	M	CT	current	current	23.346	0.904255	148	80.6667	3.43	6.53	1.02	NA	NA	10.95	6.13	100.231	6.551	100.4	20.934	23.8473	150.893	127.177	9.7425	135.278	78.5943	FALSE	FALSE	1	1	0	0	0	FALSE	b	0	502
YY024119	LYG	61.6126	M	TT	current	current	29.3947	0.981308	158.667	98	0.93	5.48	1.1	8.917	435.914	11.21	5.93	93.6789	10.416	77.9	21.123	22.7269	137.312	88.8475	9.81	135.758	80.2941	FALSE	FALSE	1	1	0	0	0	FALSE	b	1	502
YY023851	LYG	67.3457	M	CC	current	past	24.7475	0.868132	160	90	0.9	6.23	1.54	10.903	307.2	11.72	5.2	96.4675	14.789	94.9	16.789	20.94	77.65	80.825	6.59	121.574	82.7616	FALSE	FALSE	1	1	0	0	0	FALSE	a	0	503
YY024124	LYG	67.3484	M	CT	no	no	26.7229	0.978947	177.333	100	1.68	5.81	1.19	5.18	405.192	14.1	5.5	95.786	11.358	106.4	22.608	24.911	91.7875	108.108	10.36	149.333	100.667	FALSE	FALSE	1	1	0	0	0	FALSE	a	1	503
YY024178	LYG	55.2033	F	TT	no	no	23.8728	0.833333	155.333	90.6667	1.89	4.77	1.08	4.454	246.096	18.2	5.7	99.677	10.409	79.1	15.83	24.3526	142.407	113	9.84	139.825	89.4733	FALSE	TRUE	1	0	0	0	0	FALSE	b	1	504
YY024443	LYG	55.2197	F	CC	no	no	31.2554	0.932692	147.333	99.3333	0.99	5.39	1.14	9.186	260.003	10.94	4.76	78.0969	6.477	37.3	24.682	20.9267	108.275	96.8825	7.8925	158.336	104.878	FALSE	FALSE	1	1	0	0	0	FALSE	b	0	504
YY024015	LYG	72.3723	F	CT	no	no	27.9976	0.868687	182.667	99.3333	1.01	5.12	1.24	11.083	366.072	9.7	5.54	93.0457	10.108	65.1	19.693	23.0067	109.278	NA	6.875	146.333	89.3919	FALSE	TRUE	1	1	0	0	0	FALSE	a	0	505
YY024191	LYG	72.4107	F	CT	no	no	23.4566	1.03297	191.333	92	1.8	6.3	1.81	11.857	325.674	14.72	18.79	85.9738	8.386	56.6	12.645	17.6522	95.61	72.1675	7.3375	162.218	96.324	FALSE	FALSE	1	0	1	0	0	TRUE	a	1	505
YY024009	LYG	63.7125	F	CC	no	no	25.4877	0.867347	164	80	1.18	5.55	1.37	NA	NA	7.98	6.58	90.5089	13.026	94.2	32.573	18.062	89.3625	84.1375	8.3225	132.792	73.5001	FALSE	FALSE	1	0	0	0	0	FALSE	b	0	506
YY024202	LYG	63.6167	F	TT	no	no	18.9745	0.783133	180	90	0.94	4.58	1.87	16.965	440.356	8.8	6.22	94.1179	10.909	28.6	13.152	21.4914	128.28	84.9275	11.01	137.849	84.0634	FALSE	FALSE	1	1	0	0	0	FALSE	b	1	506
YY024041	LYG	51.3128	F	CT	no	no	25.7778	0.951807	154.667	82.6667	1.37	3.44	0.78	12.511	307.22	9.46	10.11	106.41	9.814	75.1	24.563	23.2739	108.282	99.1825	9.545	120.561	77.8347	FALSE	FALSE	0	0	0	0	0	FALSE	a	0	507
YY024235	LYG	51.321	F	TT	no	no	35.0862	0.927273	180	111.333	1.86	6.68	1.07	3.994	254.695	36.11	5.12	101.628	10.882	58.2	12.433	21.3573	120.582	120.832	8.1175	157.303	100.792	FALSE	TRUE	1	1	0	0	0	FALSE	a	1	507
YY024308	LYG	64.2902	F	CC	no	no	21.7001	0.888889	148	78.6667	1.29	4.91	2	10.492	327.222	12.35	4.81	93.1429	6.737	64.3	20.164	22.8729	107.248	86.5775	9.485	126.765	76.4891	FALSE	FALSE	0	1	0	0	0	FALSE	b	0	508
YY024325	LYG	64.3039	F	CT	no	no	31.2554	1.03883	211.333	101.333	2.82	5.39	0.89	11.256	301.178	14.18	6.09	101.772	10.801	70	4.912	20.6371	113.995	131.053	5.1125	150.03	83.7873	FALSE	TRUE	1	1	0	0	0	FALSE	b	1	508
YY024278	LYG	72.0465	F	CT	no	no	24	0.98913	188.667	74.6667	1.51	5.68	1.95	7.884	288.136	11.73	5.13	94.2118	10.811	81	6.958	18.2187	97.345	146.17	7.9325	135.913	65.8283	FALSE	TRUE	1	1	0	0	0	FALSE	b	0	509
YY024376	LYG	72.0301	F	CT	no	no	23.0871	0.946809	152.667	84	1.08	4.02	1.3	3.281	444.177	10.35	8.4	97.044	5.646	50.6	6.952	21.7061	125.535	98.8125	7.16	170.667	100.667	FALSE	TRUE	1	0	0	0	0	FALSE	b	1	509
YY024390	LYG	59.6441	F	CT	no	no	27.7639	0.887755	160	98.6667	0.87	3.84	1.2	10.428	509.673	9.66	5.21	87.8466	3.804	44	17.507	21.4534	114.422	87.625	7.89	119.595	81.3777	FALSE	TRUE	1	1	0	0	0	FALSE	a	1	510
YY024398	LYG	59.5346	F	CC	no	no	24.4248	0.924731	150	89.3333	1.38	4.86	1.13	15.067	577.769	7.42	5.84	103.368	9.406	61.2	18.928	18.5157	60.22	104.823	7.4325	141.31	86.0651	FALSE	FALSE	1	1	0	0	0	FALSE	a	0	510
YY024456	LYG	69.243	M	CC	current	current	32.3232	0.946429	158.667	82	0.87	4.19	1.22	14.907	299.156	14.65	6.37	94.3995	5.324	38.3	17.225	20.1524	115.888	75.765	5.93	140.23	89.363	FALSE	TRUE	1	1	0	0	0	FALSE	a	1	511
YY024622	LYG	68.7858	M	CT	current	past	27.2853	1	184.667	100.667	0.94	3.79	0.94	4.938	331.261	11.54	7.12	89.3204	4.597	61.4	17.927	21.5878	94.9075	89.3975	8.0075	127.341	77.4961	FALSE	TRUE	1	1	0	0	0	FALSE	a	0	511
YY024505	LYG	66.245	F	CT	no	no	22.1421	0.825581	192	82	0.69	4.31	1.64	15.117	234.847	20.31	5.05	88.7416	1.957	22.9	13.939	22.479	154.882	78.28	7.2025	143.421	74.9204	FALSE	TRUE	1	1	0	0	0	FALSE	b	1	512
YY024848	LYG	66.2286	F	TT	no	no	24.7246	0.931818	178.667	80.6667	1.46	5.06	1.42	7.702	179.629	12.71	7.08	67.016	9.017	56.8	10.328	18.8141	112.625	113.105	6.76	162.277	72.5085	FALSE	TRUE	1	1	0	0	0	FALSE	b	0	512
YY024251	LYG	67.4278	M	CT	no	no	26.986	0.956989	184	88	3	4.55	0.98	7.619	245.41	14.94	5.45	98.8242	6.939	73.5	25.225	24.3919	105.545	100.147	7.715	141.051	76.1651	FALSE	TRUE	0	1	0	0	0	FALSE	a	0	513
YY024536	LYG	67.447	M	CT	current	current	17.5781	0.831325	160.667	80	0.73	5.7	2.19	5.4	317.806	19.25	5.69	91.4364	7.596	88.3	16.675	20.2721	86.7575	90.075	10.3525	135	80.6667	FALSE	FALSE	0	0	0	0	0	FALSE	a	1	513
YY024274	LYG	67.9316	M	CT	past	past	29.0579	1.03093	183.333	90.6667	1.14	4.77	1.6	5.747	333.545	9.86	4.23	105.316	7.928	83.7	19.684	22.7338	78.675	94.1125	9.0975	143.025	79.4736	FALSE	FALSE	1	1	0	0	0	FALSE	b	0	514
YY024647	LYG	68.0712	M	TT	no	no	23.7387	0.817204	160	100	0.73	4.97	1.37	7.011	255.954	19.34	5.76	94.2874	9.186	61.5	15.541	19.9032	109.612	84.88	6.54	140.618	85.4981	FALSE	TRUE	1	1	0	0	0	FALSE	b	1	514
YY024244	LYG	56.7118	F	TT	no	no	21.7844	0.954023	187.333	97.3333	0.96	3.86	0.81	7.315	477.165	13.51	5.28	100.862	5.671	47.2	11.93	23.6766	122.302	103.91	7.205	133.207	81.1619	FALSE	FALSE	1	1	0	0	0	FALSE	a	0	515
YY024684	LYG	56.742	F	TT	no	no	23.6512	0.902174	159.333	110.667	1.38	7.06	1.23	12.65	956.325	18.55	6.06	99.6389	11.417	76	17.422	25.7858	129.528	147.655	8.32	135.699	82.7556	FALSE	FALSE	1	1	0	0	0	FALSE	a	1	515
YY024693	LYG	56.2738	F	CT	no	no	25.7531	0.90625	201.333	107.333	1.57	6.62	1.3	11.929	378.707	11.16	6.81	99.6166	10.831	64	13.881	18.3497	64.1675	106.688	4.5975	169.638	100.36	FALSE	FALSE	1	1	0	0	0	FALSE	b	1	516
YY024723	LYG	56.3039	F	CT	no	no	28.9901	0.94	161.333	80.6667	2.1	5	1.04	7.656	280.147	12.1	6.59	102.942	7.3	48.6	14.98	21.1781	126.3	179.15	6.4325	126.754	79.156	FALSE	TRUE	1	0	0	0	0	FALSE	b	0	516
YY024761	LYG	52.9117	M	CT	current	current	22.1727	0.909091	180.667	98.6667	1.03	5.77	1.14	6.032	402.855	9.52	9.01	99.912	7.635	43.1	17.606	20.933	163.29	110.47	10.93	143.057	87.7429	FALSE	FALSE	1	0	0	0	0	FALSE	b	1	517
YY024871	LYG	52.8843	M	CC	current	current	30.3019	1.0098	176	120	0.85	5.15	1.58	5.788	259.503	12.41	5.88	99.9864	7.1	84	22.001	20.3485	101.685	97.9	9.0325	132.214	87.0498	FALSE	FALSE	1	1	0	0	0	FALSE	b	0	517
YY024193	LYG	70.7077	F	CT	no	current	27.2959	0.913978	196.667	88	1.73	8.15	2.08	8.014	373.883	11.6	5.97	88.4434	12.58	63.4	14.138	22.8011	147.792	84.86	7.265	129.565	69.3385	FALSE	FALSE	1	1	0	0	0	FALSE	a	0	518
YY024846	LYG	70.653	F	CC	past	no	22.6659	0.896552	222.667	100	1.8	7.74	1.29	8.933	317.406	12.46	5.18	91.7334	10.373	72.5	10.205	22.1822	154.743	106.112	6.9475	133.195	74.128	FALSE	FALSE	1	1	0	0	0	FALSE	a	1	518
YY024926	LYG	70.4093	F	CC	no	no	19.7724	0.85	161.333	80	1.3	5.84	1.31	22.705	383.205	14.16	5.34	91.3313	8.8	45.8	10.334	21.9297	96.7025	95.445	9.38	137.998	76.1918	FALSE	TRUE	1	1	0	0	0	FALSE	a	1	519
YY025079	LYG	70.3737	F	TT	no	no	26.5754	0.822917	161.333	80	1.9	7.75	1.08	4.61	270.766	21.18	5.16	68.4252	9.089	86	17.575	22.3234	107.545	85.45	7.92	133.063	77.342	FALSE	TRUE	1	0	0	0	0	FALSE	a	0	519
YY024528	LYG	45.4702	F	CT	no	no	24.4561	0.827586	170	102.667	2.17	5.38	1.02	9.202	428.231	12.03	5.59	96.6874	6.279	76.3	10.071	21.5826	113.89	118.243	9.7725	140.039	91.0439	FALSE	TRUE	1	0	0	0	0	FALSE	a	0	520
YY024938	LYG	45.4127	F	CT	no	no	27.3399	0.886598	153.333	91.3333	2.49	NA	1.07	4.435	1654.36	NA	NA	NA	5.515	45.1	18.524	19.6277	100.065	157.145	7.6275	142.418	86.2251	FALSE	TRUE	1	0	0	0	0	FALSE	a	1	520
YY024105	LYG	65.0623	F	CC	no	no	29.6158	0.933333	160	86	1.12	4.49	1.09	13.309	369.867	7.78	5.22	105.357	7.221	52.9	12.251	27.8187	183.005	121.502	12.61	133.69	82.2141	FALSE	TRUE	1	0	0	0	0	FALSE	a	0	521
YY024941	LYG	65.065	F	CT	no	no	29.7607	0.933333	167.333	80.6667	1.84	4.33	1.26	5.216	217.842	12.01	7.25	98.0777	6.142	35.8	6.63	20.5204	103.99	112.802	6.395	162.612	84.8068	FALSE	TRUE	1	1	0	0	0	FALSE	a	1	521
YY024135	LYG	72.8104	M	TT	no	no	25.0634	0.863158	150.667	80	0.85	4.56	1.02	4.801	266.415	24.32	4.96	97.7646	7.594	72.8	20.287	21.7947	98.0275	91.1525	7.5725	123.078	69.2513	FALSE	TRUE	1	0	0	0	0	FALSE	b	0	522
YY024992	LYG	72.8104	M	CC	current	current	25.2712	0.945652	211.333	89.3333	1.11	3.99	0.75	2.644	293.303	37.68	5.49	74.6836	4.541	45.6	11.978	19.5785	94.645	280.553	5.1525	151.671	78.2785	FALSE	TRUE	1	1	0	0	0	FALSE	b	1	522
YY024028	LYG	56.3258	F	CC	no	no	19.7796	0.835294	179.333	90	0.83	5.31	2.02	8.836	406.035	10.25	5.63	100.951	12.174	77.1	11.027	19.1115	114.618	90.4775	7.5375	136.726	78.2314	FALSE	TRUE	1	0	0	0	0	FALSE	a	0	523
YY024997	LYG	56.345	F	CT	no	no	34.2936	0.963636	160	88.6667	3.85	4.86	0.86	5.611	450.2	12.29	10.55	109.6	9.618	36.6	15.174	18.1898	112.85	283.938	7.4325	136.573	82.8654	FALSE	TRUE	1	1	0	0	0	FALSE	a	1	523
YY024440	LYG	54.7817	F	TT	no	no	27.2096	0.902174	161.333	80.6667	0.83	4.57	2	11.253	350.7	18.21	5.04	98.2661	7.675	53.2	17.634	22.7733	118.188	128.447	9.0875	134.834	83.0098	FALSE	FALSE	1	0	0	0	0	FALSE	b	0	524
YY025007	LYG	54.7461	F	CT	no	no	28.3795	0.858586	175.333	83.3333	1.42	5.76	1.22	12.272	347.226	10.6	6.1	103.025	6.845	65.3	15.302	18.8474	101.817	96.775	7.3175	137.497	82.4802	FALSE	TRUE	1	1	0	0	0	FALSE	b	1	524
YY024844	LYG	52.8077	M	CT	current	current	28.3036	0.951923	140	99.3333	9.02	3.59	0.8	5.812	327.574	12.95	5.71	82.1085	9.815	96.8	14.319	22.2462	107.735	82.3425	7.205	134.809	87.7933	FALSE	FALSE	0	0	0	0	0	FALSE	b	0	525
YY025036	LYG	52.8159	M	TT	current	no	27.1484	0.959184	167.333	108.667	1.2	3.69	0.72	3.293	312.999	42.49	5.37	99.4871	5.68	30.4	24.588	21.0493	111.543	102.752	7.1475	110.667	71.3333	FALSE	TRUE	1	1	0	0	0	FALSE	b	1	525
YY024421	LYG	58.7159	F	TT	no	no	33.2031	0.927928	151.333	103.333	1.88	4.35	0.81	9.604	312.575	15.68	6.17	88.9118	8.65	69.5	13.735	20.2178	101.44	144.558	10.4975	127.382	83.5864	FALSE	TRUE	1	1	0	0	0	FALSE	a	0	526
YY025087	LYG	58.705	F	CC	no	no	24.8875	0.804348	218.667	120	0.96	5.8	1.06	7.907	203.198	14.85	4.83	78.6326	6.908	51.5	8.285	21.1607	124.703	89.8925	5.8225	134.302	81.2664	FALSE	TRUE	1	1	0	0	0	FALSE	a	1	526
YY025110	LYG	64.7091	F	TT	no	no	26.9357	0.94	188	86	2.62	4.38	1.61	2.924	391.64	8.15	4.55	101.259	9.799	63.8	17.604	21.0196	128.815	134.285	8.98	163.424	86.5	FALSE	TRUE	1	1	0	0	0	FALSE	a	1	527
YY025515	LYG	64.8241	F	CT	no	no	20.0777	0.882353	160.667	87.3333	0.75	4.93	1.62	16.103	303.176	13.47	6.3	98.2438	8.462	38.4	13.684	25.1162	108.6	91.6725	6.0425	133.226	77.668	FALSE	FALSE	0	0	0	0	0	FALSE	a	0	527
YY025179	LYG	64.7255	M	CT	past	current	22.1297	0.968085	145.333	85.3333	0.96	3.59	0.96	5.21	435.413	12.03	6.3	80.0341	6.103	77.1	13.062	20.6679	102.565	141.727	7.2475	160.333	85.6667	FALSE	FALSE	1	0	0	0	0	FALSE	b	1	528
YY025443	LYG	64.7365	M	CT	current	past	26.5089	0.89899	154.667	100	2.12	7.52	0.98	3.164	214.219	11.67	4.81	102.718	9.762	58.6	11.301	24.144	78.255	127.157	8.2175	144.698	93.8203	FALSE	TRUE	1	1	0	0	0	FALSE	b	0	528
YY025209	LYG	69.9466	F	TT	no	no	26.0417	0.849462	150	70	1.13	5.92	1.95	9.566	304.301	14.3	5	86.9667	14.833	73.2	10.744	19.777	98.4425	84.7375	5.6525	146.904	77.9447	FALSE	TRUE	1	1	0	0	0	FALSE	b	1	529
YY025524	LYG	69.7577	F	CT	no	no	25.1675	0.907216	196.667	107.333	2.26	4.64	1.52	6.436	348.694	7.64	3.94	90.404	9.662	52.8	12.018	22.9595	126.385	97.5125	8.1275	149.109	84.5193	FALSE	FALSE	1	1	0	0	0	FALSE	b	0	529
YY025220	LYG	60.9774	M	CT	current	no	27.3475	0.911765	148.667	80	2	6.25	1.13	3.655	377.43	10.21	6.85	97.9589	9.449	67.9	20.257	20.826	89.1125	132.602	9.0275	132.854	78.3872	FALSE	FALSE	1	0	0	0	0	FALSE	a	1	530
YY025490	LYG	61.8371	M	TT	current	past	29.7608	1.10204	148.667	110	1.96	5.93	1.24	4.322	250.404	44.65	5.41	103.138	12.301	59.5	14.698	NA	NA	NA	NA	143.734	95.2423	FALSE	FALSE	1	1	0	0	0	FALSE	a	0	530
YY025241	LYG	72.7556	M	CC	current	current	18.2795	0.788235	200.667	90.6667	1.07	6.33	2.16	5.5	358.666	15.29	7.25	77.0291	10.846	123	12.776	21.0304	109.64	80.655	8.195	140.667	70.6667	FALSE	TRUE	1	1	0	0	0	FALSE	a	1	531
YY025608	LYG	73.2621	M	CT	current	no	18.5798	0.845238	155.333	64.6667	1.11	4.84	1.55	5.201	262.519	45.36	4.94	94.1468	7.799	45	23.28	22.4607	109.07	97.9325	10.1425	137.838	58.1976	FALSE	FALSE	0	0	0	0	0	FALSE	a	0	531
YY025299	LYG	60.6133	M	CT	no	no	25.9408	0.873684	168	102.667	1.16	4.83	1.22	NA	NA	14.84	5.09	93.7261	8.171	63.2	19.615	22.4962	94.665	100.82	8.2325	135.872	87.7657	FALSE	FALSE	1	1	0	0	0	FALSE	a	1	532
YY025379	LYG	60.2765	M	TT	no	no	26.9531	0.845361	156	94	1.16	6.15	1.52	4.825	306.628	22.32	5.23	90.4016	7.584	57.2	24.479	20.6441	96.84	100.995	7.965	129.525	80.977	FALSE	FALSE	0	1	0	0	0	FALSE	a	0	532
YY025302	LYG	55.3511	F	CT	no	no	22	0.818182	181.333	100	2.05	5.9	0.95	5.53	310.034	12.33	5.63	88.4166	9.999	48.7	24.406	20.1482	112.078	99.675	6.505	161.714	85.2499	FALSE	FALSE	1	0	0	0	0	FALSE	b	1	533
YY025314	LYG	55.4606	F	TT	no	no	23.4019	0.875	160	100	1.19	6.22	1.33	9.383	383.751	11.22	6.28	89.1524	8.332	59.6	21.602	20.6761	126.795	102.183	8.485	132.463	87.3871	FALSE	TRUE	1	0	0	0	0	FALSE	b	0	533
YY025318	LYG	64.4928	M	CT	no	no	25.2994	0.911111	196.667	90	1.41	5.16	1.39	7.525	280.837	15.38	6.69	98.6765	8.422	47.1	22.217	19.1108	122.07	108.865	6.59	158.811	76.8198	FALSE	TRUE	1	1	0	0	0	FALSE	b	1	534
YY025588	LYG	64.6051	M	CT	past	no	24.8833	0.861702	166.667	96	1.15	4.76	1.17	6.192	324.764	12.55	5.49	93.601	7.979	78.6	21.476	21.1715	103.19	98.1525	9.685	147.204	91.486	FALSE	FALSE	1	1	0	0	0	FALSE	b	0	534
YY025369	LYG	68.7529	F	TT	no	no	20.4998	0.844444	207.333	98	1.48	5.32	1.19	7.316	361.028	15.22	8.13	83.4758	12.873	59.6	20.914	23.5724	127.945	99.7325	7.8875	175.561	90.3879	FALSE	TRUE	1	1	0	0	0	FALSE	b	1	535
YY025605	LYG	68.8077	F	CT	no	no	29.5299	0.921569	198.667	98	1.16	6.01	1	8.203	306.415	11.01	10.8	96.7812	8.659	53.3	19.914	20.3208	128.01	136.838	9.13	161.011	79.7653	FALSE	TRUE	1	1	1	0	0	FALSE	b	0	535
YY025330	LYG	55.2635	M	TT	current	no	20.8308	0.851064	146	102	0.77	2.86	1.13	4.953	333.643	41.09	5.94	19.8281	4.288	148.2	17.724	23.096	86.9525	75.65	7.835	153.333	107	FALSE	FALSE	1	0	0	0	0	FALSE	b	0	536
YY025449	LYG	55.2663	M	CC	no	current	22.913	0.935484	200.667	124.667	1.6	4.64	0.99	11.226	394.39	11.75	12.65	104.337	7.692	77.5	19.725	23.6957	115.275	87.3125	6.605	133.038	90.9004	FALSE	FALSE	1	0	0	0	0	FALSE	b	1	536
YY025301	LYG	60.5038	F	CT	no	no	31.4349	0.889908	138	78.6667	1.04	7.12	1.66	4.816	487.295	11.02	5.99	88.952	9.184	50.5	23.001	20.8292	137.373	85.485	9.4375	129.805	79.9219	FALSE	TRUE	1	1	0	0	0	FALSE	a	0	537
YY025516	LYG	60.3778	F	TT	no	no	27.1968	0.907216	210.667	108.667	1.88	6.36	1.08	5.693	423.454	12.27	5.3	103.633	9.33	49.8	15.069	24.1327	107.72	119.51	9.1525	152.151	85.8643	FALSE	TRUE	1	0	0	0	0	FALSE	a	1	537
YY025530	LYG	55.3785	F	CT	no	no	29.8446	0.862745	187.333	100	1.24	6.36	1.28	9.05	332.096	7.88	5.87	109.168	10.776	49.3	18.396	22.083	96.985	106.795	7.4175	140.6	86.5447	FALSE	TRUE	1	1	0	0	0	FALSE	a	1	538
YY025598	LYG	55.488	F	CT	no	no	25.9234	0.918367	149.333	80	0.97	5.68	1.19	3.476	223.373	11.9	4.65	98.0457	9.14	42.8	23.126	23.7183	120.395	96.5425	7.9825	129.667	79.2066	FALSE	FALSE	1	1	0	0	0	FALSE	a	0	538
YY025429	LYG	57.7796	M	CT	current	no	28.3673	0.921569	203.333	114	1.3	4.6	0.9	4.361	323.569	12.58	4.2	98.3113	6.079	43.3	22.825	21.337	77.105	105.123	8.13	161.056	97.7706	FALSE	FALSE	1	1	0	0	0	FALSE	b	0	539
YY025542	LYG	57.7604	M	CT	past	no	23.0112	0.976471	159.333	100.667	1.33	7.73	1.34	4.215	618.17	14.2	4.83	95.5205	10.039	61.1	29.862	22.1673	91.205	97.5975	11.765	154.62	109.312	FALSE	FALSE	1	1	0	0	0	FALSE	b	1	539
YY025150	LYG	62.1437	F	CT	no	no	24.7737	0.851064	168.667	90	1.29	10.74	2.3	11.51	1361.4	17.32	9.54	53.2284	9.757	68.7	12.621	19.9267	136.675	116.472	7.8825	139.547	77.5262	FALSE	FALSE	1	0	0	0	0	FALSE	a	0	540
YY025564	LYG	62.1739	F	CT	past	no	41.1173	0.852632	150.667	80.6667	1.08	5.96	1.08	5.283	323.577	19.28	6.05	83.5248	7.97	38.4	14.86	20.425	133.968	100.448	8.4475	130.667	80.6667	FALSE	FALSE	1	0	0	0	0	FALSE	a	1	540
YY025173	LYG	72.9446	F	TT	no	no	26.1626	0.979381	157.333	79.3333	1.25	7.12	1.63	5.262	365.838	17.87	5.16	80.1583	13.219	54.3	22.973	20.1268	110.035	103.19	8.0375	127.464	72.7984	FALSE	FALSE	1	1	0	0	0	FALSE	b	0	541
YY025603	LYG	72.7556	F	CT	current	no	21.9939	0.902174	168.667	98	1.19	9.26	2.09	5.057	251.692	24.76	8.15	41.0189	12.854	67.4	5.167	22.5698	123.405	95.0325	6.7925	172.646	81.9307	FALSE	TRUE	1	1	0	0	0	FALSE	b	1	541
YY025612	LYG	65.0212	F	CC	no	no	26.0375	0.958333	196.667	90	1.31	6.86	1.06	8.56	359.238	20.02	9.98	33.9206	9.976	94	10.15	25.3011	128.127	97.85	7.5475	172.358	74.502	TRUE	TRUE	1	1	0	0	0	TRUE	a	0	542
YY025631	LYG	65.0294	F	TT	no	no	28.1476	0.930693	197.333	108	1.58	5.33	1.24	6.984	472.964	10.26	5.71	89.849	10.659	48.6	17.696	22.5857	125.422	115.403	9.2625	166.15	106.309	FALSE	TRUE	1	1	0	0	0	FALSE	a	1	542
YY025659	LYG	62.4066	F	TT	no	no	24.136	0.955056	155.333	93.3333	0.85	5.65	1.21	4.924	178.712	10.44	6.06	97.6881	6.289	49.3	16.919	22.5389	113.877	127.74	7.19	156.304	93.4214	FALSE	FALSE	1	1	0	0	0	FALSE	a	1	543
YY025679	LYG	62.5133	F	TT	no	no	20.214	0.882353	174	94	1.24	5.18	1.01	9.779	271.549	15.08	4.92	97.4324	6.896	41.2	20.899	27.3846	187.65	123.125	7.895	135.652	82.8818	FALSE	FALSE	0	0	0	0	0	FALSE	a	0	543
YY025671	LYG	64.7995	M	CC	no	no	20.2627	0.895349	232.667	138	1.16	4.52	1.22	5.024	231.67	36.64	6.13	40.6888	6.71	49.4	28.005	22.3716	106.025	167.265	6.7925	194.462	125.646	FALSE	FALSE	1	0	0	0	0	FALSE	a	1	544
YY026064	LYG	64.4162	M	CT	no	no	32.4354	1.09804	190.667	110	1.17	4.5	0.87	8.125	265.303	14.23	5.8	93.6715	6.572	56.9	19.02	22.0338	111.433	136.105	8.7375	129.508	82.815	FALSE	FALSE	1	1	0	0	0	FALSE	a	0	544
YY025738	LYG	66.9459	F	TT	no	no	25.2241	0.861702	219.333	102	0.68	4.89	1.38	4.69	254.954	15.47	5.03	84.6997	7.682	41.6	15.206	23.199	122.683	108.653	6.6825	187.301	104.84	FALSE	TRUE	1	1	0	0	0	FALSE	a	1	545
YY025829	LYG	66.9405	F	CT	no	no	32.2567	0.925234	171.333	90.6667	1.19	5.28	1.14	8.209	266.266	13.73	5.88	91.7884	9.058	64.2	11.389	21.4483	109.435	83.8	7.86	132.087	81.0436	FALSE	TRUE	1	1	0	0	0	FALSE	a	0	545
YY025770	LYG	66.9459	M	TT	current	current	20.6042	0.877778	230	118	0.96	5.1	1.65	2.941	232.238	47.36	5.15	88.33	7.12	79.8	20.637	23.1371	96.8425	115.37	8.2875	139.294	83.1171	FALSE	FALSE	1	1	0	0	0	FALSE	a	1	546
YY026149	LYG	67.2115	M	CT	no	no	27.9297	1.05208	145.333	85.3333	2.28	6.8	1.3	8.187	353.687	12.52	6.88	95.6955	8.297	65.7	17.549	19.3181	101.415	114.44	8.34	139.761	73.2797	FALSE	TRUE	1	1	0	0	0	FALSE	a	0	546
YY025839	LYG	68.7693	F	CT	current	current	19.2901	0.8	180.667	100	0.97	6.89	1.99	4.688	315.896	13.59	5.85	93.4765	7.051	39.6	7.359	23.2137	121.035	125.743	7.7075	160.032	83.3066	FALSE	FALSE	1	0	0	0	0	FALSE	b	1	547
YY025864	LYG	68.7912	F	CT	no	no	28.6412	0.84466	170	90	2.35	3.58	1.45	4.208	279.254	10.49	5.31	97.8263	9.712	78.5	17.875	17.9258	111.748	109.83	7.865	160.652	89.5077	FALSE	TRUE	1	1	0	0	0	FALSE	b	0	547
YY025919	LYG	58.0424	M	TT	past	past	27.9431	0.91	172	102	1.21	5.92	1.42	4.647	297.541	14.32	4.86	91.8315	6.751	52.5	15.766	23.5077	87.2725	109.267	7.32	138.675	84.8106	FALSE	TRUE	1	1	0	0	0	FALSE	a	1	548
YY026146	LYG	58.1437	M	TT	no	no	27.6398	1.06522	171.333	100.667	1.46	6.88	1.33	8.962	411.959	12.7	6.55	100.231	10.282	53.7	24.471	22.9997	101.01	131.185	9.1975	145.431	82.1632	FALSE	FALSE	1	1	0	0	0	FALSE	a	0	548
YY025720	LYG	58.4203	F	CT	no	no	24.4494	0.908163	130	99.3333	1.02	5.79	1.28	5.014	363.874	11.36	5.64	98.0688	7.02	40.5	15.382	22.652	106.703	102.075	7.265	134.519	86.1179	FALSE	FALSE	0	1	0	0	0	FALSE	a	0	549
YY025964	LYG	58.4449	F	CT	no	no	28.512	0.866667	159.333	100	3.08	6.08	1.56	5.268	254.463	22.12	6.51	95.4097	12.116	70.6	6.58	24.0296	123.168	171.472	7.2575	138.731	86.4405	FALSE	TRUE	1	1	0	0	0	FALSE	a	1	549
YY025973	LYG	64.2765	M	CT	no	current	27.6095	0.92233	150.667	96	2.15	5.65	1.29	8.705	813.98	12.03	5.18	87.5048	12.038	62.3	24.102	25.9053	91.5925	138.79	9.1	139.611	90.2786	FALSE	FALSE	1	0	0	0	0	FALSE	a	0	550
YY025982	LYG	64.449	M	CT	no	no	24.4646	0.945055	176	84.6667	1.72	4.64	1.48	8.37	602.555	13.09	5.39	99.4241	7.672	50.8	20.031	20.4829	73.95	101.885	8.3575	158.46	80.7235	FALSE	FALSE	1	1	0	0	0	FALSE	a	1	550
YY025666	LYG	48.0301	F	CT	no	no	21.6413	0.823529	159.333	98	0.69	4.58	1.27	7.027	371.93	9.66	5.68	102.928	5.536	38.3	13.339	20.3701	111.24	98.0325	7.1975	143.078	95.1348	FALSE	FALSE	1	1	0	0	0	FALSE	b	0	551
YY026043	LYG	47.8576	F	TT	no	no	27.3845	0.84466	153.333	99.3333	0.67	4.68	1.71	4.407	330.24	16.55	5.74	90.2557	5.461	31	15.821	19.6821	93.44	100.365	7.145	138.741	92.6778	FALSE	TRUE	1	1	0	0	0	FALSE	b	1	551
YY026060	LYG	55.885	F	TT	no	no	29.4467	0.89899	170	90	1.3	5.65	1.19	4.945	441.991	17.04	6.23	106.88	0.761	33.5	9.625	27.5279	135.028	118.748	9.9525	128.973	82.2043	FALSE	TRUE	1	0	0	0	0	FALSE	a	1	552
YY026169	LYG	55.8631	F	TT	current	no	24.4873	0.858696	158	91.3333	1.08	6.85	1.53	5.402	350.593	12.94	4.75	88.9007	9.672	46.9	16.535	21.4223	106.02	103.485	7.73	129.972	78.2367	FALSE	FALSE	1	0	0	0	0	FALSE	a	0	552
YY026139	LYG	65.2621	M	TT	past	past	29.4076	0.950495	145.333	90	1.21	7.81	1.16	4.348	300.85	27.77	5.73	88.0785	9.386	42.2	16.73	19.5912	172.38	105.382	9.245	139.333	84	FALSE	TRUE	0	0	0	0	0	FALSE	a	1	553
YY026241	LYG	65.5359	M	TT	current	past	25.815	0.967391	160.667	99.3333	1.26	4.4	0.88	2.019	254.663	32.06	9.13	93.422	7.09	24.5	13.173	19.0359	82.28	117.472	7.3525	135.828	79.6798	FALSE	TRUE	1	0	0	0	0	FALSE	a	0	553
YY025970	LYG	55.8604	F	CT	no	no	23.9043	0.9	159.333	96	1.73	7.16	1.42	4.489	339.901	17.54	9.96	44.5338	14.883	44.1	6.407	22.0257	106.235	137.257	6.87	137.474	77.267	FALSE	TRUE	1	1	0	0	0	FALSE	b	0	554
YY026190	LYG	55.7782	F	CC	no	no	35.544	0.963303	181.333	103.333	2.14	5.84	0.96	12.941	314.826	9.67	5.6	110.644	11.045	33.3	16.385	23.2833	132.222	98.045	8.3125	134.551	84.7054	FALSE	TRUE	1	1	0	0	0	FALSE	b	1	554
YY026049	LYG	60.8487	F	CC	no	no	25.3942	0.866667	172	76	0.9	5.12	1.26	5.527	303.053	13.68	5.46	71.6733	6.635	27.4	16.891	17.7218	109.08	77.5875	7.385	124.586	70.6197	FALSE	FALSE	1	1	0	0	0	FALSE	a	0	555
YY026203	LYG	60.9665	F	CT	no	no	26.5089	0.902913	141.333	86	1.34	5.89	1.15	8.606	366.74	8.99	6.83	94.2928	11.7	36.2	22.227	21.0665	114.487	111.775	9.395	144.847	89.5596	FALSE	TRUE	1	1	0	0	0	FALSE	a	1	555
YY026182	LYG	68.7803	F	CC	no	no	25.1953	0.959184	178.667	112	1.68	7.57	1.2	12.547	276.798	10.02	5.06	89.5996	12.797	55.5	13.857	23.4022	108.567	133.465	6.225	151.115	91.3772	FALSE	TRUE	1	1	0	0	0	FALSE	b	0	557
YY026356	LYG	68.7365	F	TT	no	no	27.9513	0.980583	191.333	103.333	0.73	5.12	1.12	4.584	332.67	14.41	5.53	75.5471	6.189	34.5	14.39	22.9114	137.958	107.772	9.3475	144.386	90.8864	FALSE	FALSE	1	1	0	0	0	FALSE	b	1	557
YY026381	LYG	67.499	M	TT	past	no	25.58	0.951456	172.667	90	2.3	6.17	0.88	2.9	420.767	81.47	5.24	89.3006	8.433	56.4	18.407	19.5184	102.103	114.103	7.5275	151.581	89.832	FALSE	TRUE	1	1	0	0	0	FALSE	b	1	558
YY026424	LYG	67.5592	M	TT	current	current	24.9581	0.93617	161.333	93.3333	1.59	5.2	1.03	5.329	252.591	16.42	4.56	90.2426	8.817	70.6	22.831	20.7939	90.04	105.02	8.95	136.334	89.0141	FALSE	FALSE	0	1	0	0	0	FALSE	b	0	558
YY025667	LYG	65.5003	F	CT	no	no	24.1546	0.911111	181.333	90.6667	1.74	6.29	1.45	7.747	451.106	10.93	5.52	78.2209	8.683	59.9	19.938	23.7843	114.76	93.8675	7.1525	141.903	80.783	FALSE	TRUE	1	0	0	0	0	FALSE	a	0	559
YY026401	LYG	65.4346	F	TT	no	no	25.8477	0.892473	182	100	1.88	6.89	1.33	6.509	294.117	17.94	5.81	93.6267	12.446	53.1	18.443	21.5651	116.15	94.6625	8.86	136.144	80.3844	FALSE	FALSE	0	0	0	0	0	FALSE	a	1	559
YY026027	LYG	74.2806	F	CT	no	no	21.9261	0.88764	142	81.3333	2.32	4.32	1.02	5.333	370.708	22.38	6.13	62.1882	6.307	54	10.949	23.3371	77.76	87.69	6.44	127.614	75.7513	FALSE	TRUE	0	0	0	0	0	FALSE	a	0	560
YY026416	LYG	73.8946	F	CT	no	no	23.4628	0.893617	181.333	94	1.28	5.58	1.2	4.641	342.24	7.93	4.94	91.2119	4.345	33.5	7.515	24.6347	109.168	108.855	8.22	160.667	90.6667	FALSE	FALSE	1	0	0	0	0	FALSE	a	1	560
YY026425	LYG	56.668	F	CC	no	no	31.1516	0.990741	179.333	85.3333	2.32	4.6	1.06	4.607	360.177	9.91	5.15	98.8827	9.626	50	15.143	18.8485	89.795	117.875	8.575	131.651	72.4014	FALSE	TRUE	1	0	0	0	0	FALSE	a	0	561
YY026461	LYG	56.6653	F	CC	no	no	29.4467	0.89899	160	94	1.19	5.17	1.21	4.617	293.664	11.25	5.58	98.1024	8.471	36.6	17.625	22.1611	97.5725	109.657	9.9575	152.717	91.3451	FALSE	TRUE	1	1	0	0	0	FALSE	a	1	561
YY026150	LYG	70.5763	F	TT	no	no	21.7784	0.868132	164	84.6667	0.83	4.9	1.41	10.813	357.894	12.87	5.35	64.2142	7.759	52.8	15.247	19.4693	109.067	99.36	6.26	146.298	80.7017	FALSE	FALSE	1	1	0	0	0	FALSE	b	0	562
YY026475	LYG	70.5024	F	CT	no	no	20.7725	0.954023	171.333	91.3333	1.16	5.46	1.04	4.281	297.583	17.07	4.63	81.8469	7.555	31.4	15.388	18.2665	109.188	142.907	9.4825	159.023	88.2057	FALSE	TRUE	1	1	0	0	0	FALSE	b	1	562
YY026494	LYG	73.5606	M	TT	current	current	23.6275	0.933333	192.667	100	1.37	3.57	1.13	3.596	343.079	16.79	4.88	72.1108	4.642	82.1	23.723	21.4222	78.55	139.845	8.785	150.333	86.3333	FALSE	TRUE	1	1	0	0	0	FALSE	a	1	563
YY026618	LYG	73.5195	M	TT	no	no	20.1562	0.806818	150.667	66.6667	1.1	4.32	1.12	5.245	308.699	20.03	4.19	88.4299	5.394	28.5	28.964	20.0898	122.293	117.085	7.7	147.808	80.8145	FALSE	FALSE	1	1	0	0	0	FALSE	a	0	563
YY026555	LYG	46.757	F	TT	no	no	30.7004	0.884615	177.333	108.667	1.24	5.02	1.06	8.872	327.837	8.33	5.42	104.247	7.511	41.6	16.825	24.0906	106.4	122.293	5.4975	173.238	97.6853	FALSE	TRUE	1	1	0	0	0	FALSE	b	1	564
YY026678	LYG	46.7734	F	TT	no	no	25.4013	0.875	157.333	99.3333	1.99	4.77	1.45	1.139	342.238	13.66	4.8	106.616	6.154	46	19.161	19.822	97.0325	128.148	8.215	133.06	88.9112	FALSE	TRUE	0	1	0	0	0	TRUE	b	0	564
YY026632	LYG	67.7947	M	CT	past	past	24.8501	0.93	182.667	100	1.22	5.15	1.17	10.856	323.369	14.58	4.47	91.1614	8.213	51.6	13.666	22.3597	89.3375	130.88	8.93	130.925	75.1385	FALSE	TRUE	1	0	0	0	0	FALSE	b	1	565
YY026715	LYG	67.3977	M	TT	current	past	20.0777	0.879518	160	89.3333	1.6	5.81	1.37	5.768	308.059	34.13	5.68	84.2274	7.566	45	14.91	22.2195	90.9625	127.793	8.4425	144.387	83.2055	FALSE	TRUE	0	0	0	0	0	FALSE	b	0	565
YY026638	LYG	74.4969	F	TT	no	no	29.2142	0.93	211.333	96	2.06	4.92	1.37	11.09	219.777	24.48	4.72	85.5573	10.178	41.7	7.162	24.0906	106.4	122.293	5.4975	142.667	83	FALSE	TRUE	1	0	0	0	0	FALSE	a	1	566
YY026705	LYG	74.8446	F	CT	no	no	19.8392	0.929412	180.667	80.6667	2.08	3.86	0.72	3.838	325.445	14.05	5	91.3828	6.701	29.2	13.177	20.6142	103.493	126.21	7.62	145.692	72.4688	FALSE	TRUE	1	1	0	0	0	FALSE	a	0	566
YY026701	LYG	67.729	M	CC	current	past	25.3083	0.9375	222	104	0.6	3.91	1.06	12.404	321.57	16.43	6	62.5434	3.569	37.6	24.94	23.202	114.32	144.572	9.68	176.333	92.5726	FALSE	FALSE	1	1	0	0	0	FALSE	b	1	567
YY026937	LYG	67.9124	M	TT	no	no	18.5547	0.783133	150.667	70.6667	0.74	5.43	1.4	9.182	399.667	12.79	4.89	80.4863	7.653	56.7	27.219	20.3656	70.7525	117.155	7.8175	136.049	81.2687	FALSE	TRUE	1	1	0	0	0	FALSE	b	0	567
YY026667	LYG	62.1218	F	TT	no	no	24.3418	0.95	200.667	91.3333	1.36	5.1	1.7	8.75	248.745	12.91	5.14	95.057	7.631	42.2	18.617	23.7107	136.852	126.69	11.4325	142.658	83.1107	FALSE	TRUE	1	1	0	0	0	FALSE	b	0	568
YY026734	LYG	62.4476	F	CT	no	no	28.251	0.93	162	85.3333	1.31	4.62	1.72	13.847	302.11	14.59	5.59	90.6162	9.799	45.5	16.98	24.5373	157.08	145.357	7.08	170.69	82.4283	FALSE	TRUE	1	1	0	0	0	FALSE	b	1	568
YY026787	LYG	49.5962	M	CC	current	no	24.5748	0.946809	198	125.333	1.85	8.05	0.98	4.496	454.635	15.1	4.37	113.591	11.507	69	30.636	23.4872	100.838	137.923	7.895	152	92	FALSE	TRUE	1	1	0	0	0	FALSE	a	1	569
YY026963	LYG	49.4346	M	CT	past	past	22.9568	0.882979	178	104.667	0.9	5	1.21	4.819	370.424	12.66	5.24	101.878	4.814	55.8	22.199	16.8483	101.265	106.535	5.73	131.56	88.5537	FALSE	FALSE	1	1	0	0	0	FALSE	a	0	569
YY026496	LYG	54.9021	F	CT	no	no	22.3596	0.869565	159.333	92	0.73	4.05	1.68	10.919	396.624	8.71	5.28	98.183	7.596	38.4	19.867	23.4003	116.198	102.395	8.69	140.535	88.191	FALSE	FALSE	1	1	0	0	0	FALSE	a	0	570
YY026811	LYG	54.872	F	CC	no	no	34.4729	0.909091	169.333	100.667	3.01	7.26	1.04	5.289	476.588	8.2	6.58	101.926	11.283	59.4	19.842	22.3172	122.472	130.863	13.685	136.51	82.5029	FALSE	FALSE	1	1	0	0	0	FALSE	a	1	570
YY026745	LYG	50.2888	F	CC	no	no	22.6085	0.84375	156	100	2.54	5.74	0.91	11.783	326.954	15.17	5.1	105.646	12.406	65	30.241	21.133	111.22	126.843	8.46	142.989	90.307	FALSE	TRUE	0	1	0	0	0	FALSE	b	0	571
YY026818	LYG	50.4285	F	CT	no	no	33.5834	0.944954	170.667	101.333	1.88	5.56	0.67	4.558	422.502	8.17	5.22	110.119	11.706	38.3	23.491	18.4261	113.005	104.767	6.6075	165.462	102.559	FALSE	TRUE	1	1	0	0	0	FALSE	b	1	571
YY026827	LYG	57.692	M	TT	current	no	24.5322	0.913978	182	100	0.85	5.36	1.65	3.187	319.125	36.25	4.75	92.7496	8.069	41.7	25.504	20.2943	70.8625	124.418	7.865	147.131	89.4966	FALSE	FALSE	1	1	0	0	0	FALSE	a	1	572
YY026931	LYG	57.6153	M	CT	current	past	22.3432	0.857143	146.667	86.6667	1.24	5.38	1.27	6.154	296.72	31.16	5.42	34.658	6.93	72.9	21.604	23.2264	107.502	102.058	8.54	149.711	80.79	FALSE	TRUE	1	1	0	0	0	FALSE	a	0	572
YY026748	LYG	61.128	M	CT	current	no	23.4339	0.860215	184	105.333	0.74	4.64	1.65	7.492	297.376	14.2	5.35	99.6213	9.28	51.6	28.124	19.2129	82.79	128.5	12.3375	154.246	85.8049	FALSE	FALSE	1	1	0	0	0	FALSE	b	0	573
YY026865	LYG	61.1718	M	TT	no	current	27.4302	1	170	100	0.84	6.72	1.97	7.193	282.088	17.16	12.66	96.9532	9.789	69.1	28.671	21.8723	117.552	114.175	9.9025	182.997	100.662	FALSE	FALSE	1	0	0	0	0	FALSE	b	1	573
YY026810	LYG	64.4572	M	CT	current	current	22.7175	0.847826	142	86.6667	1.32	5.81	1.37	4.559	350.968	13.28	5.58	92.2817	9.851	65.9	41.604	20.8876	97.5425	90.05	7.4475	137.79	84.3279	FALSE	FALSE	0	0	0	0	0	FALSE	a	0	574
YY026911	LYG	64.2491	M	CC	current	current	19.6593	0.88764	166	97.3333	0.52	6.15	2.7	6.965	323.614	8.44	5.14	95.3887	6.47	60.3	37.304	20.4208	111.047	109.028	7.825	167.435	86.3933	FALSE	FALSE	0	1	0	0	0	FALSE	a	1	574
YY027018	LYG	51.9726	M	CT	current	past	16.456	0.878049	188.667	112	1.19	3.8	1.33	3.553	444.415	12.79	4.59	117.241	4.333	44.5	8.593	19.2584	99.365	120.38	6.1675	156.922	106.772	FALSE	FALSE	1	1	0	0	0	FALSE	a	0	575
YY027074	LYG	52.104	M	CT	current	no	25.4088	0.959596	160.667	119.333	1.44	3.31	0.92	NA	NA	22.62	5.74	77.0905	4.092	42.1	25.294	21.9643	104.13	137.708	20.6225	136.593	97.597	FALSE	TRUE	1	1	0	0	0	FALSE	a	1	575
YY027101	LYG	46.7159	F	CT	no	past	24.4616	0.876404	143.333	90	0.73	6.17	1.08	10.111	197.562	6.57	6.7	118.483	5.72	34.5	13.652	19.1041	99.49	121.532	7.335	160.281	99.6935	FALSE	FALSE	1	1	0	0	0	FALSE	a	1	576
YY027492	LYG	46.6146	F	CT	no	no	23.7088	0.726316	136.667	98	0.97	3.52	0.82	2.501	364.824	7.72	4.98	110.622	5.166	30.9	23.855	19.553	115.052	104.835	7.6	117.35	77.6864	FALSE	FALSE	0	0	0	0	0	FALSE	a	0	576
YY027147	LYG	74.6174	F	CC	current	current	23.9025	0.98913	148.667	82.6667	1.58	5.07	0.86	4.486	342.993	17.38	5.09	66.7343	4.142	32.6	11.308	21.8642	119.02	116.993	7.085	145.333	86.3333	FALSE	TRUE	1	1	0	0	0	FALSE	a	1	577
YY027882	LYG	74.9158	F	CT	no	no	27.9103	1	180	91.3333	1.19	3.88	1.05	4.702	380.93	17.76	5.87	40.6158	5.141	80.1	17.382	21.2237	101.095	97.7525	6.825	154.579	83.6814	FALSE	TRUE	1	1	0	0	0	FALSE	a	0	577
YY027156	LYG	53.8836	F	CC	no	no	22.3703	0.873563	201.333	92	1.35	11.52	0.91	12.37	311.881	11.48	4.71	99.9821	4.747	49.6	22.09	19.629	92.5475	116.838	6.045	154.048	81.5504	FALSE	TRUE	1	1	0	0	0	FALSE	b	1	578
YY027192	LYG	53.8179	F	TT	no	no	27.1203	0.94898	166.667	94.6667	1.56	5.36	0.97	6.794	496.248	15.03	5.19	80.0404	6.997	69	25.985	21.5355	109.058	119.54	10.905	125.351	81.0209	FALSE	TRUE	1	0	0	0	0	FALSE	b	0	578
YY027157	LYG	52.8652	M	CC	no	no	18.9036	0.813953	141.333	86.6667	1.48	5.67	1.15	9.74	316.183	19.33	5.17	46.9857	6.612	83.5	14.3	20.048	103.375	106.573	6.3675	122.746	76.9134	FALSE	TRUE	1	1	0	0	0	FALSE	a	1	579
YY027805	LYG	53.0075	M	CT	current	current	22.2222	0.921348	130	101.333	0.75	4.57	1.8	10.455	915.525	9.72	5.91	103.042	10.313	93.1	40.562	22.4668	73.3025	119.248	8.5725	131.453	94.0078	FALSE	FALSE	1	1	0	0	0	FALSE	a	0	579
YY027218	LYG	70.5681	M	CT	current	past	23.38	0.925532	134	83.3333	1.88	5.87	1.31	10.101	469.054	18.51	6.16	87.3489	5.553	41.3	19.429	21.9453	111.5	113.103	9.265	138.281	84.9531	FALSE	TRUE	1	0	0	0	0	FALSE	a	1	580
YY027287	LYG	70.5927	M	TT	past	no	19.735	0.851852	168	80.6667	0.81	2.99	0.89	11.836	225.851	46.61	5.59	87.3808	4.248	34.6	15.161	NA	NA	NA	NA	135.767	82.6886	FALSE	FALSE	1	1	0	0	0	FALSE	a	0	580
YY027060	LYG	74.9021	M	CC	past	past	22.6318	0.934066	169.333	98	0.8	3.85	1.19	11.783	332.257	15.8	4.99	82.4355	3.113	26.1	11.005	20.2126	101.112	138.023	8.5175	137.447	80.3779	FALSE	TRUE	1	0	0	0	0	FALSE	a	0	581
YY027233	LYG	74.8857	M	CC	current	current	21.4326	0.863636	185.333	103.333	1.04	6.23	1.53	10.748	505.635	13.16	6.19	84.0206	8.295	46.9	21.955	19.5463	122.805	109.935	15.7175	151.271	83.4836	FALSE	FALSE	1	1	0	0	0	FALSE	a	1	581
YY027226	LYG	59.5044	M	CT	no	no	28.1969	0.919192	156.667	90	1.58	3.91	0.8	16.98	356.041	8.62	4.82	98.1534	9.291	95.6	39.137	23.1458	104.4	137.863	11.1775	153.162	90.6279	FALSE	TRUE	1	1	0	0	0	FALSE	b	0	582
YY027280	LYG	59.7755	M	CC	current	past	20.8954	0.863636	188	121.333	0.76	4	0.84	4.969	227.78	15.89	5.07	75.7794	4.615	41	17.898	22.6735	119.825	120.782	6.43	110	80	FALSE	FALSE	1	1	0	0	0	FALSE	b	1	582
YY027291	LYG	64.3778	F	CC	no	no	28.7268	0.959184	180	83.3333	1.16	4.38	0.93	6.031	243.502	15.01	6.08	92.211	5.047	30.1	15.609	21.8171	122.537	135.03	6.91	186.543	88.4358	FALSE	FALSE	1	1	0	0	0	FALSE	a	1	583
YY027641	LYG	64.4025	F	TT	no	no	25.8477	0.989247	170.667	130	2.56	4.7	1.1	6.149	246.739	14.3	4.51	104.223	8.106	61.6	26.76	19.6177	90.765	153.218	5.84	139.874	91.2688	FALSE	FALSE	1	1	0	0	0	FALSE	a	0	583
YY027296	LYG	46.987	F	CT	no	past	25.0292	0.894737	171.333	103.333	0.72	4.64	1.18	9.182	408.111	12.22	5.88	101.793	3.844	26	17.258	21.7357	126.875	110.44	8.7225	171.364	103.857	FALSE	TRUE	1	1	0	0	0	FALSE	b	1	584
YY027566	LYG	46.9514	F	CT	no	no	23.1006	0.78125	160	99.3333	0.99	5.74	1.59	4.541	342.821	7.77	5.01	107.368	6.651	42.7	15.576	17.3472	131.315	134.472	10.9575	135.313	88.6176	FALSE	TRUE	1	1	0	0	0	FALSE	b	0	584
YY027341	LYG	55.2936	M	CC	past	no	28.0277	0.970297	170	120.667	1.77	3.77	0.73	7.978	287.487	12.84	5.69	107.396	4.533	76.3	34.059	19.8614	89.3775	114.64	6.49	177.657	115.229	FALSE	TRUE	1	1	0	0	0	FALSE	a	1	585
YY027424	LYG	55.4059	M	CT	no	past	25.1621	0.95	130.667	100	1.16	3.56	0.89	4.619	368.587	9.29	5.01	104.435	6.214	50	21.917	16.1539	78.825	101.935	6.855	133.461	87.9709	FALSE	TRUE	1	1	0	0	0	FALSE	a	0	585
YY027358	LYG	55.488	F	CT	no	no	22.4273	0.835165	219.333	120.667	0.93	NA	1.42	8.149	351.984	NA	NA	NA	9.677	42.5	24.676	18.515	91.6975	114.983	7.095	161.333	104.667	FALSE	FALSE	1	1	0	0	0	FALSE	a	1	586
YY027439	LYG	55.4579	F	CC	no	no	27.9561	0.896907	169.333	90	2	6.09	1.04	6.38	390.48	9.17	6.47	107.9	11.135	79.4	31.778	22.0138	123.862	145.153	9.655	132.658	85.0577	FALSE	FALSE	0	1	0	0	0	FALSE	a	0	586
YY027479	LYG	50.527	F	TT	no	no	26.1307	0.794118	180	110	0.89	5.09	1.35	4.433	273.536	24.12	5.05	101.97	7.152	42.8	24.058	19.4581	102.1	112.815	8.6075	147.991	101.01	FALSE	TRUE	1	1	0	0	0	FALSE	b	1	587
YY027850	LYG	50.7105	F	CT	no	no	19.4258	0.814815	164	106	0.68	4.89	1.73	7.74	685.14	7.61	5.37	105.921	9.274	40.2	23.229	20.0747	97.4575	115.183	8.4825	130.108	87.4917	FALSE	FALSE	1	1	0	0	0	FALSE	b	0	587
YY027499	LYG	60.9582	M	TT	current	no	29.7551	0.933333	200	108.667	0.95	5.07	0.8	4.865	297.707	40.73	5.75	87.9958	4.087	43.1	30.819	21.9948	119.002	118.215	9.9025	176.495	92.3026	FALSE	FALSE	1	1	0	0	0	FALSE	b	1	588
YY027548	LYG	60.9062	M	TT	no	current	20.5049	0.939024	150.667	91.3333	1.5	4.95	1.21	3.859	412.725	20.79	6.21	96.7355	7.078	70.1	32.979	19.2621	112.105	124.668	9.165	135.254	89.5192	FALSE	FALSE	1	1	0	0	0	FALSE	b	0	588
YY027518	LYG	55.0116	F	CT	no	no	30.0217	0.891304	200	102	1.4	5.13	0.97	7.761	272.055	12.95	5.74	97.5823	5.958	47.4	30.423	20.5072	179.865	113.442	12.02	187.226	100.653	FALSE	FALSE	1	1	0	0	0	FALSE	a	1	589
YY027725	LYG	55.0445	F	CT	no	no	26.2378	0.910891	150.667	97.3333	1.25	4.69	1.26	5.638	229.119	9.33	5.19	108.135	7.248	61.6	25.889	21.7986	148.33	133.1	12.545	144.328	86.9359	FALSE	TRUE	1	0	0	0	0	FALSE	a	0	589
YY027242	LYG	52.6133	M	TT	no	no	24.4785	0.935484	131.333	99.3333	0.91	3.45	1.37	12.62	1261.43	11.54	4.59	110.504	5.228	54.1	24.451	18.6134	90.515	135.028	9.1575	129.249	91.412	FALSE	FALSE	1	1	0	0	0	FALSE	b	0	590
YY027522	LYG	52.7118	M	CC	no	past	26.9751	0.970588	138.667	90	2.51	4.11	0.72	7.715	953.285	12.99	6.01	102.348	7.973	62.5	18.651	18.9224	71.28	122.835	6.1125	132.618	90.9062	FALSE	FALSE	1	0	0	0	0	FALSE	b	1	590
YY027591	LYG	58.3765	F	TT	no	no	25.3203	0.904255	140	90	2.81	5.82	1.26	4.226	317.991	14.64	5.56	99.8725	6.174	72.1	18.781	21.2247	77.6725	133.028	6.1675	152.858	93.0817	FALSE	TRUE	1	1	0	0	0	FALSE	b	0	591
YY027602	LYG	58.4586	F	CT	no	no	27.1918	0.938776	154	70	1.72	4.84	1.2	6.76	337.8	17.18	5.6	101.658	5.636	52.3	29.422	20.5003	115.73	149.485	8.3875	149.887	72.0496	FALSE	FALSE	1	0	0	0	0	FALSE	b	1	591
YY027748	LYG	61.5715	M	CC	current	no	28.5483	0.92	160.667	120.667	1.08	4.38	0.93	8.575	677.4	18.1	4.97	97.8469	11.153	52.6	26.09	22.6072	84.94	119.355	6.165	141.472	88.8284	FALSE	TRUE	1	1	0	0	0	FALSE	b	0	592
YY027756	LYG	61.5441	M	CT	current	past	28.0064	0.950495	158	104	1.14	4.93	1.19	6.251	238.833	13.68	5.64	70.1269	7.179	49.3	34.578	20.1191	101.252	125.198	6.0775	134.19	86.3766	FALSE	FALSE	1	1	0	0	0	FALSE	b	1	592
YY027696	LYG	55.9151	M	TT	past	current	22.9112	0.922222	131.333	79.3333	1.88	5.79	1.1	3.805	273.241	51.56	6.16	94.9114	4.451	48.9	21.979	22.2177	116.29	132.13	9.7575	147.16	87.1816	FALSE	TRUE	1	1	0	0	0	FALSE	a	0	593
YY027813	LYG	55.8248	M	CC	current	current	27.0993	1.0202	140	98	2.14	6.6	1.53	7.765	309.292	15.84	6.61	98.4886	9.33	145.7	28.144	20.2524	117.612	146.285	11.695	133.006	89.8659	FALSE	FALSE	1	1	0	0	0	FALSE	a	1	593
YY027225	LYG	59.7673	M	TT	no	no	29.1386	1	146.667	100	1.45	2.75	0.82	9.135	1161.74	15.49	5.02	97.7415	3.867	56	21.104	21.5916	90.11	126.047	7.165	134.275	91.3927	FALSE	FALSE	0	1	0	0	0	FALSE	a	0	594
YY027822	LYG	59.707	M	CT	no	current	25.9701	0.909091	200.667	120.667	1.03	5.42	1.96	9.527	262.4	15.3	4.91	85.6257	7.868	98.4	42.355	21.1384	108.078	130.69	9.9225	150	100	FALSE	TRUE	1	1	0	0	0	FALSE	a	1	594
YY027663	LYG	53.347	M	CT	no	no	21.988	0.891304	161.333	100	0.94	4.8	1.3	4.234	225.148	13.37	5.92	100.613	10.1	58.1	29.158	19.7572	73.655	105.94	7.56	138.005	91.2927	FALSE	TRUE	1	1	0	0	0	FALSE	b	0	595
YY027835	LYG	53.3771	M	TT	no	current	26.8122	0.989583	162	120	1.21	5.2	1.31	5.514	247.967	NA	6.19	109.99	9.673	98	21.824	21.5116	107.895	125.34	12.1975	149.918	99.4032	FALSE	FALSE	1	1	0	0	0	FALSE	b	1	595
YY027864	LYG	59.4962	M	CT	no	current	25.6276	0.95	170	100.667	1.81	5.16	0.9	4.672	203.346	11.16	8.7	101.347	6.543	67.8	24.267	19.4	86.0375	100.96	9.7	138.667	88.6667	FALSE	TRUE	0	0	0	0	0	FALSE	a	1	596
YY027976	LYG	59.5647	M	TT	current	no	33.0016	0.965517	168	103.333	1.88	5.74	0.98	9.553	263.488	15.93	8.55	97.4807	11.306	55.2	25.664	21.5035	113.88	113.67	6.5	131.471	86.0767	FALSE	TRUE	1	0	0	0	0	FALSE	a	0	596
YY027275	LYG	58.2368	F	CT	no	no	36.2229	0.956522	158	102	2.07	5.68	1.05	6.639	253.355	12.19	5.77	109.097	5.9	37.1	20.123	19.6202	96.19	108.645	7.6025	148.964	95.3506	FALSE	FALSE	1	0	0	0	0	FALSE	a	0	597
YY027902	LYG	58.2177	F	TT	no	no	26.8814	1	163.333	98.6667	2.05	6.62	1.17	6.203	366.937	14.66	10.7	100.922	9.275	52.9	25.908	20.4037	96.7225	120.445	6.9725	148.818	81.2264	FALSE	TRUE	1	1	0	0	0	TRUE	a	1	597
YY027911	LYG	57.5715	M	CT	current	current	26.5629	0.92	157.333	100	0.89	5.19	1.31	11.32	1025.69	11.17	6.13	98.9705	7.242	91.1	22.69	20.6111	90.79	385.832	9.3575	139.88	89.4469	FALSE	FALSE	0	1	0	0	0	FALSE	a	0	598
YY028012	LYG	57.5551	M	CT	no	no	26.6518	0.94898	124.667	83.3333	1.47	2.52	0.87	NA	NA	8.15	7.72	103.605	8.966	71.1	20.319	22.3075	97.905	122.445	8.525	145.775	88.5078	FALSE	TRUE	1	1	0	0	0	TRUE	a	1	598
YY027105	LYG	71.7837	M	CC	no	no	23.0204	0.884211	140	97.3333	3.03	5.2	0.89	9.195	1177.14	15.51	6.17	91.7464	5.536	49.3	17.07	18.3156	84.25	115.825	7.2225	126.822	73.5658	FALSE	TRUE	0	0	0	0	0	FALSE	b	0	599
YY028016	LYG	71.8303	M	CT	past	past	25.6696	1.0099	143.333	96	1.23	5.58	1.18	5.311	357.757	19.03	5.86	84.3607	8.102	66.3	14.308	22.0657	138.99	127.075	8.78	139.422	89.6976	FALSE	TRUE	1	1	0	0	0	FALSE	b	1	599
YY027868	LYG	63.3867	F	TT	no	no	27.884	0.939394	151.333	91.3333	1.84	4.73	1.28	4.705	690.92	25.07	5.27	98.7145	7.887	43.8	24.59	20.6931	118.123	133.165	7.0975	136.385	80.1692	FALSE	FALSE	0	1	0	0	0	FALSE	b	0	600
YY028027	LYG	63.3895	F	CT	no	no	27.5873	0.93	158.667	87.3333	2.47	6.24	1.3	4.455	374.692	21.65	6.45	61.6179	7.994	76.9	24.032	21.2106	129.373	154.565	7.4575	140.608	85.8017	FALSE	TRUE	0	1	0	0	0	FALSE	b	1	600
YY027337	LYG	57.9932	F	CT	no	no	21.5019	0.863636	142.667	67.3333	0.8	3.92	0.93	9.009	421.767	10.54	5.27	87.1051	4.077	48.8	17.683	25.248	129.055	185.27	8.64	148.344	65.7576	FALSE	TRUE	1	1	0	0	0	FALSE	a	0	601
YY028046	LYG	58.0014	F	CC	no	no	26.4024	0.917526	176	108	1.92	3.05	0.81	4.682	288.934	17.39	5.46	90.3606	4.948	61.9	27.296	21.0933	95.23	110.165	7.405	153.915	94.3277	FALSE	TRUE	1	1	0	0	0	FALSE	a	1	601
YY028048	LYG	46.5982	F	TT	no	no	34.5758	0.9	180	107.333	2.49	5.18	0.62	6.803	272.889	21.76	6.42	110.419	6.575	56.8	13.665	22.3596	105.77	137.278	7.325	152.286	89.2383	FALSE	FALSE	1	0	0	0	0	FALSE	a	0	602
YY028062	LYG	46.59	F	CC	no	no	27.7778	0.857143	174.667	110	2.19	5.32	1.28	10.15	200.731	7.69	5.92	107.449	6.955	53.3	19.154	21.9064	83.15	120.885	8.305	125.592	89.3187	FALSE	FALSE	1	1	0	0	0	FALSE	a	1	602
YY028081	LYG	56.8706	F	TT	no	no	32.05	0.909091	158	98	2.3	5.02	1.11	8.792	354.48	8.73	7.22	104.666	9.95	77.1	25.451	18.2019	94.1225	141.845	7.2875	153.891	96.3458	FALSE	TRUE	1	1	0	0	0	FALSE	b	1	603
YY028175	LYG	56.9774	F	CT	no	no	23.1796	0.952381	150.667	86	2.57	6.06	1.37	3.33	205.351	13	5.26	97.8327	10.445	65.3	19.547	20.2136	148.595	109.817	9.1925	139.174	74.2868	FALSE	TRUE	1	1	0	0	0	FALSE	b	0	603
YY028111	LYG	56.3532	F	CC	no	no	18.8889	0.829268	169.333	86.6667	0.81	3.59	1.29	5.671	276.445	12.19	4.08	67.7698	7.135	62.1	26.203	19.9509	101.362	114.608	6.6825	172.333	87	FALSE	TRUE	1	1	0	0	0	TRUE	a	1	604
YY028536	LYG	56.3532	F	TT	no	no	28.8589	0.962264	188	98.6667	1.56	4.91	1.04	9.315	412.935	13.46	6.04	101.427	8.555	67.9	17.482	20.639	85.015	114.81	6.4075	158.725	90.1053	FALSE	TRUE	1	0	0	0	0	FALSE	a	0	604
YY028141	LYG	68.0821	F	CT	no	no	20.8051	0.882353	145.333	62	1.24	6.98	1.67	4.31	352.905	11.27	5.41	70.4321	10.944	47.3	16.737	22.4227	117.705	109.873	7.6975	127.986	68.8081	FALSE	TRUE	0	0	0	0	0	FALSE	b	0	605
YY028165	LYG	68.0712	F	CC	no	no	25.2826	0.855769	185.333	73.3333	1.46	6.15	1.29	6.782	222.146	14.6	6.44	69.1004	8.466	40.7	25.289	21.0589	114.85	108.627	7.5725	175.843	70.2057	FALSE	FALSE	1	1	0	0	0	FALSE	b	1	605
YY028180	LYG	61.6509	F	CT	no	no	27.8293	0.884615	154	88.6667	1.35	6.67	1.45	9.056	296.27	9.6	5.97	95.98	13.842	39.3	24.135	20.3056	163.577	115.912	10.2075	99.3333	60.6667	FALSE	FALSE	1	0	0	0	0	FALSE	b	1	606
YY028563	LYG	61.2704	F	CT	no	no	28.6016	0.915094	182	90	1.51	4.33	0.89	4.545	277.21	12.53	6.56	99.4127	4.286	34	19.022	20.047	101.755	94.9775	6.3875	136.992	78.9903	FALSE	FALSE	1	1	0	0	0	FALSE	b	0	606
YY028185	LYG	62.7543	F	CC	no	no	23.4337	0.831579	152	92	1.35	6.7	1.37	10.29	110.67	7.75	6.46	95.0178	10.185	57.2	14.548	19.7843	99.655	125.703	4.89	124.89	78.535	FALSE	FALSE	1	1	0	0	0	FALSE	b	1	607
YY028257	LYG	62.7625	F	CT	no	no	23.2117	0.836957	166	88.6667	1.4	3.49	1.12	9.598	336.556	14.16	5.65	36.0457	8.31	40.9	14.137	20.426	120.99	158.637	8.675	148.557	81.3665	FALSE	TRUE	1	1	0	0	0	FALSE	b	0	607
YY028077	LYG	73.9302	M	CT	no	no	24.9937	0.857143	120	80	0.92	6.89	1.4	NA	NA	15.47	5.78	70.8798	9.647	47.4	22.617	20.4235	105.127	101.707	7.825	114.226	76.1451	FALSE	TRUE	1	0	0	0	0	FALSE	a	0	608
YY028254	LYG	73.6646	M	CC	past	current	28.3447	0.933333	173.333	98.6667	1.92	4.85	1.05	7.838	295.99	14.81	5.41	73.5306	9.053	77.3	19.341	19.7477	103.388	123.88	6.1	180.667	91	FALSE	TRUE	1	1	0	0	0	FALSE	a	1	608
YY028172	LYG	63.5756	F	TT	no	no	25.6837	0.905263	163.333	86.6667	1.66	4.83	1.38	9.947	237.492	9.03	5.39	101.331	9.141	58.6	14.758	20.0384	138.502	142.745	8.755	142.748	81.9742	FALSE	TRUE	1	0	0	0	0	FALSE	b	0	609
YY028269	LYG	63.5811	F	CT	current	past	23.7449	0.842105	182	105.333	2.56	4.55	1.17	4.288	368.836	13.28	5.12	62.1446	6.994	94.9	11.031	23.5337	134.15	158.032	10.16	131.333	70.6667	FALSE	TRUE	1	1	0	0	0	FALSE	b	1	609
YY028276	LYG	54.6311	F	TT	no	no	34.012	0.990741	156.667	96.6667	6.07	4.45	1.01	9.234	595.676	6.8	8.39	78.2931	9.84	60.7	27.76	20.7313	115.062	126.71	6.535	141.881	83.8845	FALSE	TRUE	1	1	0	0	0	FALSE	b	1	610
YY028409	LYG	54.6229	F	TT	no	no	26.8889	0.897959	162	90	1.74	4.55	1	4.428	359.485	17.95	5.31	82.5718	7.466	65.8	20.272	22.031	129.002	137.412	9.26	140.973	81.1659	FALSE	FALSE	1	1	0	0	0	FALSE	b	0	610
YY028300	LYG	46.9021	F	CT	no	no	23.7449	0.869565	154.667	96	1.94	3.66	1.04	14.497	378.397	6.14	4.78	115.26	8.006	47.8	19.209	21.0373	162.787	134.735	8.645	139.771	89.2578	FALSE	TRUE	1	0	0	0	0	FALSE	b	1	611
YY028501	LYG	46.8172	F	CT	no	no	23.1594	0.842697	126.667	86.6667	1.23	3.38	0.84	7.032	256.383	8.68	5.45	107.47	6.26	39.6	20.387	19.5663	113.912	118.025	6.855	144.018	87.2841	FALSE	TRUE	1	0	0	0	0	FALSE	b	0	611
YY028078	LYG	61.8125	F	CT	no	no	28.9461	0.901961	160	90	1.56	6.5	1.38	7.42	605.495	13.31	5.2	96.1524	9.918	66.6	22.466	20.4154	111.24	114.545	9.025	141.969	82.4513	FALSE	TRUE	1	0	0	0	0	FALSE	a	0	612
YY028325	LYG	61.9959	F	CT	no	past	30.259	1	196.667	88.6667	1.13	4.46	0.89	11.525	959.255	9.32	10.18	98.0932	8.529	47.7	19.455	21.6507	146.007	141.553	9.3575	157.461	77.0441	FALSE	TRUE	1	0	0	0	0	FALSE	a	1	612
YY028346	LYG	71.4634	F	TT	no	no	24.7582	0.977778	148.667	80	0.91	5.64	1.16	10.985	627.875	6.68	12.05	98.6341	11.914	57.3	15.663	19.1706	104.405	133.185	9.0975	154.378	75.2918	FALSE	FALSE	1	1	0	0	0	TRUE	a	1	613
YY028534	LYG	71.6386	F	CT	no	no	26.9357	0.846939	208	90.6667	2	4.72	1.2	13.66	184.868	25.84	4.82	87.5779	9.66	54.8	20.092	21.3263	108.445	141.998	6.43	150.451	80.9889	FALSE	TRUE	1	1	0	0	0	FALSE	a	0	613
YY028240	LYG	71.9151	M	TT	no	past	22.7371	0.923913	190.667	100	1.26	4.99	1.1	2.761	570.092	20.73	5.26	86.6663	5.715	47	25.973	19.5738	99.4625	154.415	6.875	170.484	90.108	FALSE	TRUE	1	1	0	0	0	FALSE	a	0	614
YY028359	LYG	71.7864	M	CT	current	current	25.1486	0.897727	200	74.6667	1.39	5.18	1.12	NA	NA	11.14	7.26	83.5046	8.5	93.6	27.721	20.774	101.25	116.888	6.92	152.851	63.6196	FALSE	TRUE	1	1	0	0	0	FALSE	a	1	614
YY028381	LYG	59.2279	M	TT	past	current	24.3646	0.958333	168	98.6667	1.16	4.91	1.34	11.738	445.763	8.28	5.65	109.258	10.603	60.8	22.526	18.6417	131.298	144.127	13.33	142.333	82	FALSE	FALSE	1	0	0	0	0	FALSE	a	1	615
YY028612	LYG	59.1759	M	TT	current	current	27.2311	0.95098	150	82.6667	2.69	5.31	0.87	10.157	292.142	15.71	8.18	107.671	7.951	77.6	28.255	20.1065	81.955	112.853	7.67	134.323	81.8083	FALSE	FALSE	0	0	0	0	0	FALSE	a	0	615
YY028178	LYG	63.2088	M	CT	no	no	24.5617	0.958333	144	90	1.02	NA	1.8	15.087	237.21	NA	NA	NA	9	76	32.602	20.5027	95.5625	148.07	7.5225	130.75	77.1077	FALSE	TRUE	1	1	0	0	0	FALSE	b	0	616
YY028482	LYG	63.0198	M	CC	no	no	21.9939	0.905882	194.667	125.333	0.79	4.55	1	NA	NA	23.66	7.01	93.6344	6.146	37.3	19.998	21.4082	92.69	122.69	6.9375	168.437	98.6293	FALSE	TRUE	1	1	0	0	0	FALSE	b	1	616
YY028558	LYG	66.5873	M	CC	past	current	24.0238	0.935484	180	91.3333	2.28	3.84	0.89	7.882	193.629	14.51	6.85	92.8968	5.536	100.1	32.284	22.0671	77.24	137.76	9.4975	151.98	89.1929	FALSE	FALSE	1	1	0	0	0	FALSE	b	0	617
YY028581	LYG	65.4018	M	CT	past	no	30.8444	0.951456	151.333	100	4.93	4.3	0.85	3.524	308.701	12.87	6.55	94.904	8.121	49.6	18.606	20.6022	85.21	199.305	7.07	151.312	83.2869	FALSE	TRUE	1	1	0	0	0	TRUE	b	1	617
YY028372	LYG	53.9055	F	TT	no	past	22.4379	0.815217	158.667	80.6667	1.27	5.89	1.65	8.771	421.817	9.67	15.11	108.221	10.627	70.9	18.657	17.0906	89.2675	108.847	8.625	150.354	73.0945	FALSE	TRUE	1	0	0	0	0	FALSE	a	0	618
YY028599	LYG	53.8398	F	CT	no	no	31.3798	0.833333	200.667	128	2.02	6.25	1.27	8.72	346.15	9.65	5.97	104.943	9.161	56.4	26.06	21.7241	112.882	122.233	7.4925	178	115.667	FALSE	FALSE	1	1	0	0	0	FALSE	a	1	618
YY028168	LYG	57.9932	F	CT	no	no	31.4465	0.963636	183.333	101.333	2.4	4.35	0.91	4.759	306.604	13.01	6.59	96.9746	7.082	45.4	21.117	19.49	102.575	133.458	7.63	151.237	80.5893	FALSE	TRUE	1	1	0	0	0	FALSE	a	0	619
YY028609	LYG	57.6181	F	TT	no	no	28.6412	0.93	148.667	96.6667	1.9	3.92	0.9	2.349	479.502	16.25	5.92	97.2305	5.07	67.1	27.805	23.3391	108.77	126.625	7.7625	111.333	71.3333	FALSE	TRUE	1	1	0	0	0	FALSE	a	1	619
YY028655	LYG	61.3443	F	CT	no	no	26.1066	0.891089	182.667	103.333	1.67	5.47	1.31	5.649	291.81	10.86	5.27	93.5362	7.02	50	22.679	18.6086	118.015	115.907	7.1225	150.963	76.3907	FALSE	TRUE	1	1	0	0	0	FALSE	a	1	620
YY029153	LYG	61.3881	F	CT	no	no	27.1616	0.965517	197.333	96.6667	1.38	5.89	0.76	NA	NA	12.19	5.38	95.8232	8.355	54.2	31.426	23.3022	117.825	96.3075	7.2925	170.439	93.81	FALSE	FALSE	1	1	0	0	0	FALSE	a	0	620
YY028693	LYG	59.3867	M	TT	no	current	24.7475	0.989011	158	94.6667	0.85	6.43	0.93	4.234	307.562	65.03	6.44	90.0269	7.736	54.6	27.918	18.978	112.5	108.198	6.7075	146.018	90.0775	FALSE	FALSE	1	1	0	0	0	FALSE	a	1	621
YY028933	LYG	59.3073	M	CT	past	current	25.7812	0.947368	151.333	98	1.12	5.03	1.35	6.634	314.738	11.03	5.95	89.4151	9.15	109.1	25.348	20.1885	105.235	122.108	11.1025	152.725	114.944	FALSE	TRUE	1	1	0	0	0	FALSE	a	0	621
YY028728	LYG	57.7577	F	TT	no	no	30.3302	0.92	157.333	88.6667	0.94	4.71	1.05	8.44	244.88	13.96	5.7	78.3717	4.95	27.8	21.983	21.2554	124.347	147.49	7.3575	141.389	81.5548	FALSE	FALSE	0	1	0	0	0	FALSE	a	1	622
YY028827	LYG	57.9767	F	CT	no	no	27.6795	0.94	171.333	110.667	1.81	5.4	1.26	8.582	352.39	8.24	5.06	97.3668	10.62	62.8	64.019	20.1155	97.3675	158.745	6.915	144.267	90.8771	FALSE	TRUE	1	1	0	0	0	FALSE	a	0	622
YY028731	LYG	59.8823	F	CT	no	no	23.2816	0.911111	168.667	88.6667	1.83	7.05	1.26	5.913	817.793	11.1	5.83	85.4924	8.247	80.2	19.249	22.5658	101.987	117.065	9.58	155.439	85.4437	FALSE	TRUE	1	0	0	0	0	FALSE	b	1	623
YY028813	LYG	59.9069	F	CC	no	no	24.3845	0.894737	190	100	1.33	5.95	1.11	13.549	363.654	6.74	6.08	98.9871	8.104	48.3	21.108	20.9901	106.198	121.195	9.43	137.971	77.9255	FALSE	TRUE	1	0	0	0	0	FALSE	b	0	623
YY028749	LYG	62.7077	F	CT	no	no	25.9695	0.915789	152.667	90	0.94	4.57	1.49	NA	NA	12.29	5.25	97.7885	7.148	52.3	25.661	18.9313	126.965	135.095	5.97	142.667	89.237	FALSE	TRUE	1	1	0	0	0	FALSE	a	1	624
YY028916	LYG	62.6694	F	CT	no	no	21.9816	0.944444	154	85.3333	2.62	7.06	1.23	7.582	306.766	9.12	9.42	101.4	16.071	82.7	20.319	21.4713	122.4	154.393	10.055	135.473	81.4379	FALSE	FALSE	0	1	0	0	0	FALSE	a	0	624
YY028788	LYG	67.4908	M	CT	current	current	27.7967	0.942308	177.333	90.6667	0.87	4.56	1.39	5.229	323.188	8.15	5.36	104.139	6.872	50.2	23.101	20.2922	59.1375	135.678	6.5525	146.667	89.3333	FALSE	FALSE	0	0	0	0	0	FALSE	b	1	625
YY028902	LYG	67.7207	M	TT	no	no	20.4452	0.896552	163.333	98	0.76	5	1.05	4.166	357.447	41.6	5.69	86.1814	7.447	46.1	18.267	20.3728	142.185	139.54	9.82	144.547	82.5083	FALSE	FALSE	1	1	0	0	0	FALSE	b	0	625
YY028793	LYG	58.4504	M	TT	past	current	29.9308	0.990291	160	90.6667	1.82	6.84	0.99	2.401	262.985	88.44	6.47	107.124	13.81	66.4	23.035	18.0003	77.6725	114.005	5.6875	151.333	88	FALSE	FALSE	1	1	0	0	0	FALSE	b	1	626
YY029183	LYG	58.4504	M	CT	no	current	24.577	0.945055	160.667	98.6667	1.22	6.87	1.03	8.775	321.697	11.03	5.49	100.755	9.761	78.8	23.533	18.3345	134.183	75.535	7.5125	137.557	84.7523	FALSE	FALSE	1	0	0	0	0	FALSE	b	0	626
YY028807	LYG	55.6988	F	CC	no	no	30.0914	0.925234	178	107.333	2.58	4.87	1.13	12.952	384.278	9.93	5.21	105.604	11.847	50.7	14.305	21.5603	104.787	172.43	7.9825	159.035	95.8398	FALSE	TRUE	1	1	0	0	0	FALSE	a	1	627
YY028987	LYG	55.8056	F	CT	no	no	27.0954	0.938776	161.333	94.6667	1.92	3.52	0.67	5.671	405.645	13.4	5.4	94.7625	4.37	47.1	9.859	21.6432	135.523	163.327	7.6075	134.242	86.659	FALSE	TRUE	1	1	0	0	0	FALSE	a	0	627
YY028811	LYG	74.4778	M	TT	past	current	25.6245	0.989362	162	94	1.61	5.83	1.02	2.778	307.203	53.32	6.53	86.6853	5.238	48.4	28.829	21.0282	95.4575	151.882	7.99	147.399	83.8674	FALSE	FALSE	1	1	0	0	0	FALSE	b	0	628
YY028869	LYG	74.9624	M	CT	current	no	32.4587	1.02857	182.667	80.6667	2.04	NA	0.78	8.659	333.972	NA	NA	NA	7.705	54.1	19.557	23.8442	131.093	157.84	8.29	156.49	82.2055	FALSE	TRUE	1	0	0	0	0	FALSE	b	1	628
YY028768	LYG	53.1061	M	CT	past	past	23.0914	0.848837	147.333	98	1.34	7.27	1.61	6.596	347.841	8.91	5.52	111.222	12.508	115.4	38.485	19.5356	85.49	118.47	8.26	132.132	95.7359	FALSE	TRUE	1	1	0	0	0	FALSE	a	0	629
YY028887	LYG	52.9281	M	CT	no	past	24.841	0.903226	210	130	1.37	NA	0.97	9.332	425.043	NA	NA	NA	6.258	77.8	34.388	20.3281	99.99	121.272	7.3125	155.844	100.464	FALSE	TRUE	1	1	0	0	0	FALSE	a	1	629
YY028812	LYG	72.5996	M	CC	no	current	21.5448	0.872093	182.667	90.6667	0.88	5.09	1.33	6.87	317.465	10.24	7.76	90.553	5.646	56.1	23.799	17.4291	82.395	127.66	7.855	139.287	77.2949	FALSE	FALSE	1	1	0	0	0	TRUE	a	0	630
YY028957	LYG	72.8378	M	CC	current	current	23.426	1	157.333	86.6667	1.83	5.71	1.1	5.949	364.277	16.7	5.64	78.4155	6.427	86.5	31.721	20.6595	110.317	97.27	6.585	135.862	83.5811	FALSE	TRUE	0	1	0	0	0	FALSE	a	1	630
YY028885	LYG	52.1862	F	CT	no	no	26.2715	0.911765	161.333	110.667	0.81	6.16	1.11	11.818	337.866	12.5	5.41	88.0165	10.093	42.8	21.041	19.6554	124.627	115.74	11.98	157.086	100.552	FALSE	TRUE	1	1	0	0	0	FALSE	a	0	631
YY028986	LYG	52.2026	F	CC	no	no	21.0828	0.847059	212.667	103.333	0.54	5.5	2.06	10.659	457.017	9.58	5.11	108.983	8.284	43.2	17.66	20.5988	63.365	122.175	6.5	179.08	99.502	FALSE	FALSE	1	1	0	0	0	FALSE	a	1	631
YY028996	LYG	69.5797	F	TT	no	no	25.1545	0.865979	159.333	86.6667	1.32	5.38	1.25	NA	NA	8.78	6.13	83.6141	10.392	45.2	16.155	21.7607	129.065	99.66	8.83	138.633	77.2904	FALSE	TRUE	0	0	0	0	0	FALSE	b	1	632
YY029034	LYG	69.5168	F	CC	no	no	27.8061	0.977778	178.667	108.667	1.77	5.45	0.82	5.83	268.729	9.91	5.32	79.7541	4.72	54.8	19.714	19.1363	100.668	111.315	5.62	142.294	77.5269	FALSE	TRUE	1	1	0	0	0	FALSE	b	0	632
YY028881	LYG	72.6105	F	CC	no	no	18.7292	0.819277	186.667	82.6667	1	4.05	1.05	8.286	475.446	15.57	6.59	63.4952	4.946	48.2	12.442	19.6772	178.377	105.05	7.6075	160.027	76.1539	FALSE	TRUE	1	1	0	0	0	FALSE	a	0	633
YY029001	LYG	72.8077	F	CT	no	no	23.6476	0.954545	159.333	100.667	1.95	7.07	1.15	7.966	337.293	15.68	10.03	88.7451	6.404	74.4	24.924	17.71	119.585	140.665	7.395	148.679	82.2489	FALSE	FALSE	0	1	0	0	0	FALSE	a	1	633
YY029014	LYG	51.9124	M	CT	current	current	23.8304	0.914894	150	100	2	6.07	1.16	4.662	336.685	12.05	6.24	99.6871	6.901	63.7	37.874	19.7315	95.93	156.238	8.52	159.425	107.239	FALSE	TRUE	1	1	0	0	0	FALSE	a	0	634
YY029037	LYG	51.8576	M	CC	no	current	30.8532	1	132	77.3333	1.95	5.46	0.86	5.433	252.852	11.85	5.29	103.144	5.849	50.3	14.226	24.9405	118.438	139.312	8.5225	134.97	80.6096	FALSE	TRUE	1	0	0	0	0	FALSE	a	1	634
YY029063	LYG	47.6632	F	TT	no	no	28.0401	0.88	158.667	88	0.9	4.48	1.56	6.97	515.918	13.6	5.28	101.31	8.772	47.3	23.005	20.4361	49.7875	79.095	8.0525	132.18	85.66	FALSE	TRUE	1	1	0	0	0	FALSE	b	0	635
YY029137	LYG	47.6413	F	CC	no	no	26.1374	0.932584	135.333	96	2.03	5.21	1.04	3.439	284.497	13.39	5.41	105.66	7.76	58.2	27.225	18.1345	115.185	116.93	8.8525	136.218	83.053	FALSE	FALSE	1	0	0	0	0	FALSE	b	1	635
