# Supplementary material for: Plasma Vitamin E and the Risk of First Stroke in Hypertensive Patients: A Nested Case-Control Study
Source: Front Nutr. 2021 Nov 3;8:734580. doi: 10.3389/fnut.2021.734580 (PMC8595403; doi:10.3389/fnut.2021.734580)
Supplement: Supplementary file 3 [file Data_Sheet_2.XLSX]

## Sheet: Sheet1
Variables	Meanings
ID
center
age
sex	F: female M: male
c677t	MTHFR CC Genotype
smk.grp	Smoking status
alh.grp	Alcohol drinking
bmi	Body mass index
wh.ratio	Waist-hip ratio
sbp	Baseline SBP
dbp	Baseline DBP
stroke_time_sbp	Time averaged SBP
stroke_time_dbp	Time averaged DBP
tg	Triglycerides, mmol/L
tcho	Total cholesterol, mmol/L
hdl	HDL cholesterol, mmol/L
fa	Folate, ng/mL
b12	Vitamin B12, pg/mL
hcy	Total homocysteine, μmol/L
glu	Fasting glucose, mmol/L
egfr	eGFR, ml/min/1.73m2
VitE	Vitamin E, μg/mL
VitA	Retinol, μg/dL
VitD3	Vitamin D3, ng/m
Mg	Magnesium, mg/L
Cu	Copper, μg/dL
Zn	Zinc, μg/dL
Se	Selenium, μg/dL
drug.glu	Glucose-lowering drugs
drug.hyt	Antihypertensive drugs
usage.ccb	Calcium channel blockers
usage.du	Diuretics 1: TRUE 2: FALSE	during the treatment period
usage.glu.lowering	Glucose-lowering drugs 1: TRUE 2: FALSE
usage.anti.plt	Antiplatelet drugs 1: TRUE 2: FALSE
usage.lipid.lowering	Lipoprotein-lowering drugs 1: TRUE 2: FALSE
hist.dm	history of diabetic
group	a: Enalapril Group b: Enalapril–Folic Acid Group
stroke	first stroke 1: TRUE 2: FALSE
pair
